# Supplementary material for: Deciphering phylogenetic relationships and delimiting species boundaries using a Bayesian coalescent approach in protists: A case study of the ciliate genus Spirostomum (Ciliophora, Heterotrichea)
Source: PubMed Central journal article supplement (PMC6841689; doi:10.1038/s41598-019-52722-4), 2019-11-08
Supplement: 41598_2019_52722_MOESM1_ESM.pdf [file 41598_2019_52722_MOESM1_ESM.pdf]

# Supplementary material

for DOI : 10.1038/s41598-019-52722-4 in **Scientific Reports**

## **Deciphering phylogenetic relationships and delimiting species boundaries using a Bayesian coalescent approach in protists: A case study of the ciliate genus *Spirostomum* (Ciliophora, Heterotrichea)**

**Shahed Uddin Ahmed Shazib<sup>1,a</sup>, Peter Vd'ačný<sup>2,a</sup>, Marek Slovák<sup>3,4</sup>, Eleni Gentekaki<sup>5</sup> & Mann Kyoon Shin<sup>1\*</sup>**

<sup>1</sup>Department of Biological Science, University of Ulsan, Ulsan 44610, South Korea. <sup>2</sup>Department of Zoology, Comenius University in Bratislava, 842 15 Bratislava, Slovakia. <sup>3</sup>Plant Science and Biodiversity Centre, Institute of Botany, Slovak Academy of Sciences, 845 23 Bratislava, Slovakia. <sup>4</sup>Department of Botany, Charles University, 128 01 Prague, Czech Republic. <sup>5</sup>School of Science, Mae Fah Luang University, Chiang Rai 57100, Thailand. Correspondence and requests for materials should be addressed to M.K.S. (email: [mkshin@ulsan.ac.kr](mailto:mkshin@ulsan.ac.kr))

<sup>a</sup>Both authors contributed equally.

**Pages:** 36

**Figures:** 2

**Tables:** 22





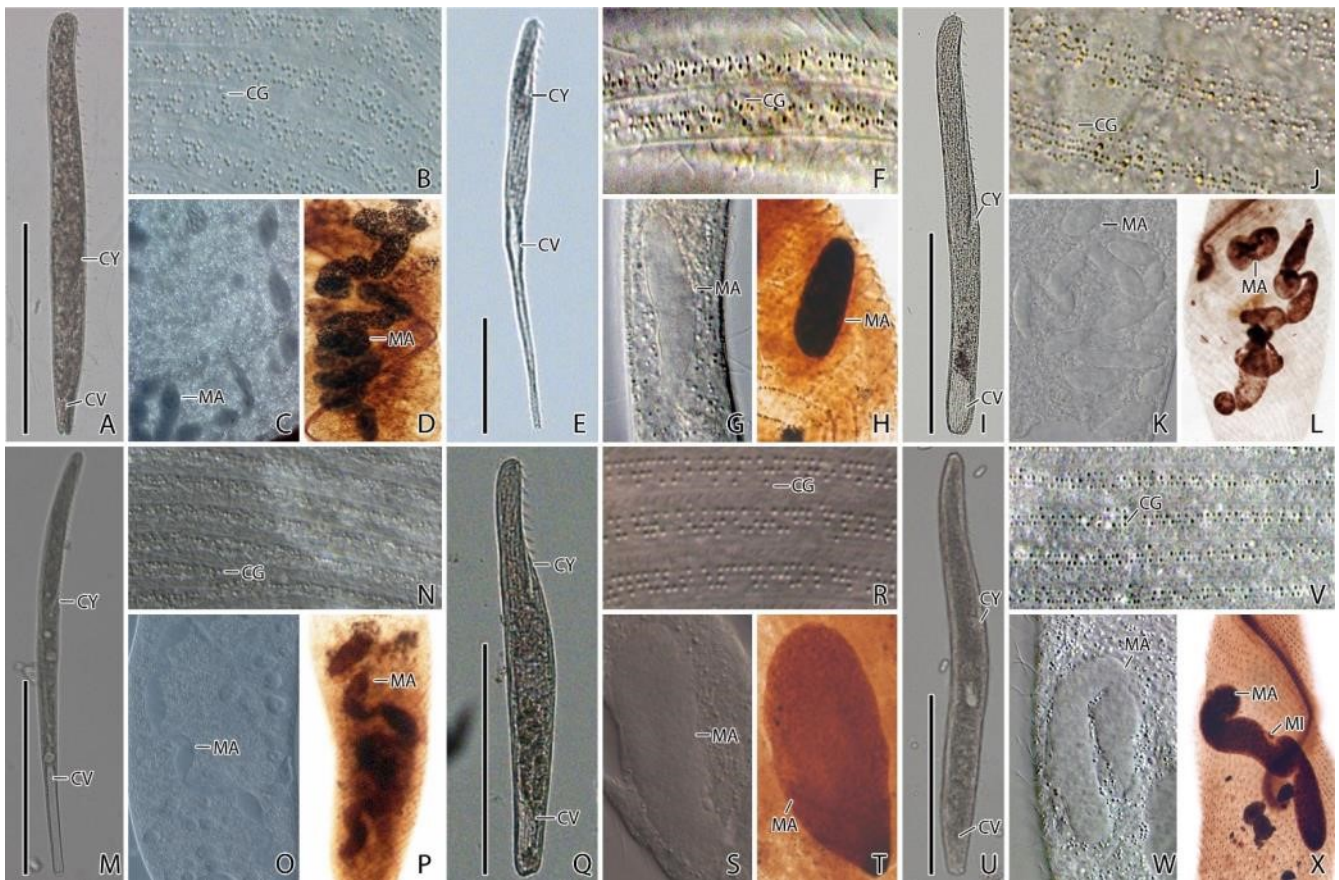

**Supplementary Figure S2.** Six *Spirostomum* species in vivo and after protargol impregnation investigated in the present study. Overviews showing the body shape (A, E, I, M, Q, U), arrangement of cortical granules (B, F, J, N, R, V), nuclear apparatus in vivo (C, G, K, O, S, W) and after protargol impregnation (D, H, L, P, T, X). (A–D) *Spirostomum ambiguum* is characterized by having a peristome occupying about 45–78% of the body length, a moniliform macronucleus, a truncated posterior body end, and 2–5 cortical granule rows between adjacent somatic kineties. (E–H) *Spirostomum caudatum* is distinguished by having a peristome occupying about 18–20% of the body length, an ellipsoid macronucleus, a tail-like posterior body end, and 2–3 cortical granule rows between adjacent somatic kineties. (I–L) *Spirostomum minus* has a peristome occupying about 40–65% of the body length, a moniliform macronucleus, a truncated posterior body end, and 2–5 cortical granule rows between adjacent somatic kineties. (M–P) *Spirostomum subtilis* is characterized by having a peristome occupying about 28–61% of the body length, a moniliform macronucleus, a truncated posterior body end, and 1–4 cortical granule rows between adjacent somatic kineties. (Q–T) *Spirostomum teres* has a peristome occupying about 31–56% of the body length, an ellipsoid macronucleus, a truncated posterior body end, and 2–6 cortical granule rows between adjacent somatic kineties. (U–X) *Spirostomum yagiui* is characterized by having a peristome occupying about 21–59% of the body length, a curved cylindroid macronucleus, a truncated posterior body end, and 2–6 cortical granule rows between adjacent somatic kineties. CG, cortical granules; CV, contractile vacuole; CY, cytotome; MA, macronucleus; MI, micronucleus. Scale bars: Scale bars: 100  $\mu\text{m}$  (E), 200  $\mu\text{m}$  (I, Q, U), and 500  $\mu\text{m}$  (A, M).

**Supplementary Table S1.** Sampling sites and characterisation of the 18S rRNA gene, ITS region, D1D2 domain of the 28S rRNA gene, alpha-tubulin gene and mitochondrial COI gene for a total of 86 *Spirostomum* populations. Species are arranged alphabetically, and new sequences are in bold face. Sequence information has been updated for the SKS026 and SKS085 populations previously described by Shazib *et al.* (2014).

| Population ID | Species name                  | 18S rRNA            |             |        | ITS1-5.8S-ITS2      |             |        | 28S rRNA            |             |        | a-tubulin           |             |        | COI                 |             |        | Habitat and collection location                                                        | Collection date | References                     |
|---------------|-------------------------------|---------------------|-------------|--------|---------------------|-------------|--------|---------------------|-------------|--------|---------------------|-------------|--------|---------------------|-------------|--------|----------------------------------------------------------------------------------------|-----------------|--------------------------------|
|               |                               | GB accession number | Length (nt) | GC (%) | GB accession number | Length (nt) | GC (%) | GB accession number | Length (nt) | GC (%) | GB accession number | Length (nt) | GC (%) | GB accession number | Length (nt) | GC (%) |                                                                                        |                 |                                |
| QinCHN        | <i>Anigsteinia clarissima</i> | KM222109            | 1705        | 46.3   | KM222077            | 263         | 47.5   | KM222166            | 700         | 50.3   | ----                | ----        | ----   | ----                | ----        | ----   | No. 1 Bathing Beach, Qingdao, China                                                    | Not provided    | Gao <i>et al.</i> (2016)       |
| SKS670        | <i>Anigsteinia</i> sp.        | KU848241            | 1669        | 46.5   | KR861718            | 257         | 48.2   | KU848225            | 792         | 51.0   | ----                | ----        | ----   | ----                | ----        | ----   | Brackish water from Taehwa river, Bangudong, Ulsan, South Korea                        | March 2014      | Shazib <i>et al.</i> (2016)    |
| SKS686        | <i>Anigsteinia</i> sp.        | KU848242            | 1676        | 46.6   | KR861719            | 256         | 48.8   | KU848226            | 785         | 51.2   | <b>MK721466</b>     | 993         | 54.5   | <b>MK721498</b>     | 744         | 26.7   | Brackish water from Taehwa river, Taehwadong, Ulsan, South Korea                       | March 2014      | Shazib <i>et al.</i> (2016)    |
| SKS167        | <i>Spirostomum ambiguum</i>   | KJ651819            | 1598        | 48.6   | KJ651852            | 257         | 56.0   | KJ651836            | 686         | 57.0   | <b>MK721467</b>     | 950         | 59.8   | <b>MK721503</b>     | 654         | 31.2   | Freshwater pond (Meonmulkkak pond), Seonheul-ri, Jocheon-eup, Jeju, South Korea        | February 2012   | Shazib <i>et al.</i> (2014)    |
| SKS363        | <i>Spirostomum ambiguum</i>   | KU848236            | 1670        | 48.1   | KR861713            | 257         | 56.0   | KU848220            | 766         | 55.2   | <b>MK721470</b>     | 950         | 59.5   | <b>MK721505</b>     | 654         | 33.2   | Freshwater pond (Jeonggol pond), Mugeodong, Ulsan, South Korea                         | July 2013       | Shazib <i>et al.</i> (2016)    |
| SKS1050       | <i>Spirostomum ambiguum</i>   | <b>MK688526</b>     | 1670        | 48.1   | <b>MK721438</b>     | 257         | 56.0   | <b>MK713380</b>     | 694         | 56.3   | ----                | ----        | ----   | ----                | ----        | ----   | Freshwater pond (Jeonggol pond), Mugeodong, Ulsan, South Korea                         | March 2016      | Present study                  |
| SKS947        | <i>Spirostomum ambiguum</i>   | <b>MK688523</b>     | 1624        | 48.2   | <b>MK721435</b>     | 257         | 56.0   | <b>MK713377</b>     | 694         | 56.3   | ----                | ----        | ----   | <b>MK721501</b>     | 696         | 32.9   | Freshwater pond (Jeonggol pond), Mugeodong, Ulsan, South Korea                         | April 2015      | Present study                  |
| SKS949        | <i>Spirostomum ambiguum</i>   | <b>MK688524</b>     | 1637        | 48.3   | <b>MK721436</b>     | 257         | 56.0   | <b>MK713378</b>     | 694         | 56.3   | <b>MK721472</b>     | 950         | 59.5   | <b>MK721502</b>     | 642         | 32.6   | Freshwater pond (Jeonggol pond), Mugeodong, Ulsan, South Korea                         | April 2015      | Present study                  |
| EU201         | <i>Spirostomum ambiguum</i>   | AM398201            | 1701        | 47.8   | AM398201            | 257         | 56.0   | AM398201            | 583         | 54.5   | ----                | ----        | ----   | ----                | ----        | ----   | Not provided                                                                           | Not provided    | Schmidt <i>et al.</i> (2007)   |
| SS4-2         | <i>Spirostomum ambiguum</i>   | HG939551            | 1702        | 47.8   | HG939551            | 257         | 56.0   | HG939551            | 505         | 53.1   | ----                | ----        | ----   | ----                | ----        | ----   | Freshwater pond inside the Skansen Open Air Museum, Djurgarden, Stockholm, Sweden      | August 2013     | Boscaro <i>et al.</i> (2014)   |
| SA            | <i>Spirostomum ambiguum</i>   | KP970238            | 1605        | 48.4   | KP970292            | 258         | 56.6   | KP970266            | 692         | 56.5   | ----                | ----        | ----   | ----                | ----        | ----   | Freshwater pond near the beach in Ilha Grande, Brazil                                  | Not provided    | Fernandes <i>et al.</i> (2016) |
| SKS185        | <i>Spirostomum ambiguum</i>   | KU848231            | 1611        | 48.3   | KR861708            | 257         | 56.0   | KU848215            | 721         | 55.9   | <b>MK721468</b>     | 950         | 59.5   | <b>MK721500</b>     | 696         | 33.0   | Freshwater from natural wetland in Ulsan Grand Park, Sinjeong-dong, Ulsan, South Korea | June 2012       | Shazib <i>et al.</i> (2016)    |
| SKS204        | <i>Spirostomum ambiguum</i>   | KU848232            | 1601        | 48.5   | KR861709            | 257         | 56.0   | KU848216            | 716         | 56.1   | ----                | ----        | ----   | ----                | ----        | ----   | Freshwater pond in Dongbaekdongsan Hill, Seonheul-ri, Jocheon-eup, Jeju, South Korea   | February 2012   | Shazib <i>et al.</i> (2016)    |
| SKS254        | <i>Spirostomum ambiguum</i>   | KU848233            | 1671        | 48.2   | KR861710            | 257         | 56.0   | KU848217            | 764         | 55.6   | <b>MK721469</b>     | 950         | 59.8   | <b>MK721504</b>     | 696         | 30.7   | Freshwater pond in Dongbaekdongsan Hill, Seonheul-ri, Jocheon-eup, Jeju, South Korea   | September 2012  | Shazib <i>et al.</i> (2016)    |
| SKS779        | <i>Spirostomum ambiguum</i>   | KU848240            | 1671        | 48.0   | KR861717            | 257         | 56.0   | KU848224            | 776         | 55.4   | <b>MK721471</b>     | 950         | 59.5   | <b>MK721506</b>     | 696         | 30.0   | Brackish water from Gyeongpoho pond, Jeodong, Gangneung, Gangwon, South Korea          | June 2014       | Shazib <i>et al.</i> (2016)    |
| SKS169        | <i>Spirostomum ambiguum</i>   | <b>MK688527</b>     | 1671        | 48.1   | <b>MK721433</b>     | 257         | 56.0   | <b>MK713375</b>     | 694         | 56.3   | ----                | ----        | ----   | ----                | ----        | ----   | Freshwater from natural wetland in Ulsan Grand Park, Sinjeong-dong, Ulsan, South Korea | June 2012       | Present study                  |
| SKS184        | <i>Spirostomum ambiguum</i>   | <b>MK688522</b>     | 1675        | 48.2   | <b>MK721434</b>     | 257         | 56.0   | <b>MK713376</b>     | 694         | 56.3   | ----                | ----        | ----   | <b>MK721499</b>     | 696         | 33.0   | Freshwater from natural wetland in Ulsan Grand                                         | June 2012       | Present study                  |



| Population ID | Species name                    | 18S rRNA            |             |        | ITS1-5.8S-ITS2      |             |        | 28S rRNA            |             |        | a-tubulin           |             |        | COI                 |             |        | Habitat and collection location                                                                       | Collection date | References                   |
|---------------|---------------------------------|---------------------|-------------|--------|---------------------|-------------|--------|---------------------|-------------|--------|---------------------|-------------|--------|---------------------|-------------|--------|-------------------------------------------------------------------------------------------------------|-----------------|------------------------------|
|               |                                 | GB accession number | Length (nt) | GC (%) | GB accession number | Length (nt) | GC (%) | GB accession number | Length (nt) | GC (%) | GB accession number | Length (nt) | GC (%) | GB accession number | Length (nt) | GC (%) |                                                                                                       |                 |                              |
|               |                                 |                     |             |        |                     |             |        |                     |             |        |                     |             |        |                     |             |        |                                                                                                       |                 |                              |
| SKS989        | <i>Spirostomum ambiguum</i>     | MK688525            | 1627        | 48.2   | MK721437            | 257         | 56.0   | MK713379            | 694         | 56.3   | MK721473            | 950         | 59.5   | MK721507            | 696         | 32.0   | Park, Sinjeong-dong, Ulsan, South Korea                                                               |                 |                              |
|               |                                 |                     |             |        |                     |             |        |                     |             |        |                     |             |        |                     |             |        | Freshwater pond in Baekdong-ri, Ungsang-eup, Yangsan, Gyeongnam, South Korea                          | May 2007        | Present study                |
| SKS813        | <i>Spirostomum caudatum</i>     | MK688528            | 1670        | 47.8   | MK721439            | 253         | 53.4   | MK713381            | 688         | 56.4   | MK721474            | 950         | 59.8   | ----                | ----        | ----   | Freshwater wetland (Gyeongancheon wetland), Jeongji-ri, Toechon-myeon, Gwangju, Gyeonggi, South Korea | August 2014     | Present study                |
| SKS302        | <i>Spirostomum caudatum</i>     | KJ651820            | 1597        | 48.1   | KJ651853            | 254         | 52.8   | KJ651837            | 685         | 55.8   | ----                | ----        | ----   | MK721508            | 699         | 28.0   | Freshwater pond (Wollangji), Nansan-ri, Seongsan-eup, Seogwipo, Jeju, South Korea                     | November 2012   | Shazib <i>et al.</i> (2014)  |
| SAd           | <i>Spirostomum dharwarensis</i> | HG939537            | 1702        | 48.0   | HG939537            | 251         | 55.0   | HG939537            | 412         | 52.9   | ----                | ----        | ----   | ----                | ----        | ----   | Estuary, Mtenu River, Province of Eastern Cape, South Africa                                          | May 2013        | Boscaro <i>et al.</i> (2014) |
| SmPS          | <i>Spirostomum minus</i>        | HG939546            | 1702        | 47.9   | HG939546            | 254         | 53.5   | HG939546            | 566         | 55.5   | ----                | ----        | ----   | ----                | ----        | ----   | Freshwater waterway close to the Aurelia road, Pisa, Italy                                            | May 2012        | Boscaro <i>et al.</i> (2014) |
| PBG1          | <i>Spirostomum minus</i>        | HG939547            | 1702        | 47.9   | HG939547            | 254         | 53.5   | HG939547            | 528         | 54.5   | ----                | ----        | ----   | ----                | ----        | ----   | Freshwater (artificial) pond, Botanical Garden, Pisa, Italy                                           | May 2013        | Boscaro <i>et al.</i> (2014) |
| SS5           | <i>Spirostomum minus</i>        | HG939548            | 1702        | 47.9   | HG939548            | 254         | 54.2   | HG939548            | 546         | 55.1   | ----                | ----        | ----   | ----                | ----        | ----   | Freshwater pond inside the Skansen Open Air Museum, Djurgarden, Stockholm, Sweden                     | August 2013     | Boscaro <i>et al.</i> (2014) |
| SKS182        | <i>Spirostomum minus</i>        | KU848230            | 1626        | 48.3   | KR861707            | 254         | 53.5   | KU848214            | 735         | 56.3   | MK721476            | 950         | 58.8   | MK721510            | 699         | 29.6   | Freshwater from natural wetland in Ulsan Grand Park, Sinjeong-dong, Ulsan, South Korea                | June 2012       | Shazib <i>et al.</i> (2016)  |
| SKS386        | <i>Spirostomum minus</i>        | KU848237            | 1675        | 48.2   | KR861714            | 254         | 53.5   | KU848221            | 768         | 56.1   | MK721478            | 941         | 58.8   | MK721513            | 699         | 29.6   | Freshwater from Mugeocheon stream, Mugeo-dong, Ulsan, South Korea                                     | April 2013      | Shazib <i>et al.</i> (2016)  |
| GuS1058       | <i>Spirostomum minus</i>        | MK688537            | 1644        | 48.4   | MK721448            | 254         | 54.3   | MK713390            | 513         | 57.1   | MK721486            | 950         | 58.7   | MK721521            | 699         | 30.5   | Freshwater from Asan River, Asan, Guam, Micronesia                                                    | July 2016       | Present study                |
| SKS1018       | <i>Spirostomum minus</i>        | MK688535            | 1671        | 48.2   | MK721446            | 254         | 53.5   | MK713388            | 694         | 57.2   | MK721484            | 950         | 58.8   | MK721519            | 699         | 29.5   | Freshwater marsh (Sinpyeongji), Sinpyeong-ri, Toseong-myeon, Goseong-gun, Gangwon, South Korea        | December 2014   | Present study                |
| SKS1073       | <i>Spirostomum minus</i>        | MK688538            | 1648        | 48.2   | MK721449            | 255         | 53.7   | MK713391            | 517         | 57.1   | MK721487            | 950         | 58.8   | MK721522            | 699         | 29.5   | Freshwater from Mineral spring ditch, Muryongsan Mt., Yeonam-dong, Ulsan, South Korea                 | March 2017      | Present study                |
| EU200         | <i>Spirostomum minus</i>        | AM398200            | 1701        | 47.6   | AM398200            | 257         | 51.8   | AM398200            | 583         | 56.3   | ----                | ----        | ----   | ----                | ----        | ----   | Not provided                                                                                          | Not provided    | Schmidt <i>et al.</i> (2007) |
| Mdg2-2        | <i>Spirostomum minus</i>        | HG939539            | 1702        | 47.6   | HG939539            | 257         | 52.1   | HG939539            | 431         | 52.7   | ----                | ----        | ----   | ----                | ----        | ----   | Freshwater lake (Ambandrika Lake), Sainte Luce, Madagascar                                            | July 2011       | Boscaro <i>et al.</i> (2014) |
| Mdg4          | <i>Spirostomum minus</i>        | HG939540            | 1702        | 47.6   | HG939540            | 257         | 52.1   | HG939540            | 566         | 56.2   | ----                | ----        | ----   | ----                | ----        | ----   | Freshwater swamp in a forest, Mandena, Madagascar                                                     | January 2012    | Boscaro <i>et al.</i> (2014) |
| Gmn           | <i>Spirostomum minus</i>        | HG939543            | 1702        | 47.6   | HG939543            | 257         | 51.8   | HG939543            | 434         | 53.0   | ----                | ----        | ----   | ----                | ----        | ----   | Freshwater stream, Nymphenburg Park, Munich, Germany                                                  | April 2011      | Boscaro <i>et al.</i> (2014) |
| SAm           | <i>Spirostomum minus</i>        | HG939545            | 1702        | 47.6   | HG939545            | 257         | 51.8   | HG939545            | 493         | 54.2   | ----                | ----        | ----   | ----                | ----        | ----   | Estuary, Mtenu River, Province of Eastern Cape, South Africa                                          | May 2013        | Boscaro <i>et al.</i> (2014) |
| SKS215        | <i>Spirostomum minus</i>        | KJ651821            | 1597        | 48.5   | KJ651854            | 254         | 53.5   | KJ651838            | 686         | 57.6   | ----                | ----        | ----   | MK721512            | 699         | 29.5   | Ephemeral freshwater puddle in Gukdang-1-ri,                                                          | July 2012       | Shazib <i>et al.</i> (2014)  |

| Population ID | Species name                     | 18S rRNA            |             |        | ITS1-5.8S-ITS2      |             |        | 28S rRNA            |             |        | a-tubulin           |             |        | COI                 |             |        | Habitat and collection location | Collection date                                                                                | References                                       |                              |  |
|---------------|----------------------------------|---------------------|-------------|--------|---------------------|-------------|--------|---------------------|-------------|--------|---------------------|-------------|--------|---------------------|-------------|--------|---------------------------------|------------------------------------------------------------------------------------------------|--------------------------------------------------|------------------------------|--|
|               |                                  | GB accession number | Length (nt) | GC (%) | GB accession number | Length (nt) | GC (%) | GB accession number | Length (nt) | GC (%) | GB accession number | Length (nt) | GC (%) | GB accession number | Length (nt) | GC (%) |                                 |                                                                                                |                                                  |                              |  |
|               |                                  |                     |             |        |                     |             |        |                     |             |        |                     |             |        |                     |             |        |                                 |                                                                                                | Gangdong-myeon, Gyeongju, Gyeongbuk, South Korea |                              |  |
| SKS161        | <i>Spirostomum minus</i>         | KU848229            | 1604        | 48.5   | KR861706            | 254         | 53.5   | KU848213            | 718         | 56.5   | <b>MK721475</b>     | 950         | 58.8   | <b>MK721509</b>     | 699         | 29.8   |                                 | Brackish water (Deahwacheon stream), Mopo-ri, Janggi-myeon, Pohang, Gyeongbuk, South Korea     | March 2012                                       | Shazib <i>et al.</i> (2016)  |  |
| SKS731        | <i>Spirostomum minus</i>         | KU848238            | 1671        | 48.3   | KR861715            | 254         | 53.1   | KU848222            | 583         | 55.6   | <b>MK721479</b>     | 950         | 58.8   | <b>MK721514</b>     | 699         | 29.6   |                                 | Freshwater pond (Heogiji reservoir), Gumi-ri, Dudong-myeon, Ulsan, South Korea                 | May 2014                                         | Shazib <i>et al.</i> (2016)  |  |
| SKS743        | <i>Spirostomum minus</i>         | KU848239            | 1671        | 48.2   | KR861716            | 254         | 53.5   | KU848223            | 767         | 56.1   | <b>MK721480</b>     | 950         | 58.8   | <b>MK721515</b>     | 699         | 29.8   |                                 | Freshwater in ricefield, Hwajeong-ri, Seosaeng-myeon, Ulsan, South Korea                       | May 2014                                         | Shazib <i>et al.</i> (2016)  |  |
| SKS1044       | <i>Spirostomum minus</i>         | <b>MK688536</b>     | 1669        | 48.2   | <b>MK721447</b>     | 254         | 53.5   | <b>MK713389</b>     | 694         | 57.2   | <b>MK721485</b>     | 950         | 58.8   | <b>MK721520</b>     | 699         | 29.6   |                                 | Freshwater reservoir (Cheonjinho), Bongpo-ri, Toseong-myeon, Goseong-gun, Gangwon, South Korea | January 2016                                     | Present study                |  |
| SKS214        | <i>Spirostomum minus</i>         | <b>MK688529</b>     | 1671        | 48.2   | <b>MK721440</b>     | 254         | 53.5   | <b>MK713382</b>     | 694         | 57.2   | <b>MK721477</b>     | 950         | 58.8   | <b>MK721511</b>     | 699         | 29.5   |                                 | Ephemeral freshwater puddle in Gukdang-1-ri, Gangdong-myeon, Gyeongju, Gyeongbuk, South Korea  | July 2012                                        | Present study                |  |
| SKS794        | <i>Spirostomum minus</i>         | <b>MK688530</b>     | 1670        | 48.2   | <b>MK721441</b>     | 254         | 53.9   | <b>MK713383</b>     | 694         | 57.2   | <b>MK721481</b>     | 944         | 58.9   | <b>MK721516</b>     | 699         | 29.3   |                                 | Freshwater pond (Nonmul pond), Ojo-ri, Seongsan-eup, Seogwipo, Jeju, South Korea               | June 2014                                        | Present study                |  |
| SKS840        | <i>Spirostomum minus</i>         | <b>MK688531</b>     | 1609        | 48.4   | <b>MK721442</b>     | 254         | 53.5   | <b>MK713384</b>     | 694         | 57.2   | <b>MK721482</b>     | 950         | 58.8   | <b>MK721517</b>     | 699         | 29.5   |                                 | Freshwater pond, Naeheung-ri, Gyeryong-myeon, Gongju, Chungnam, South Korea                    | October 2014                                     | Present study                |  |
| SKS939        | <i>Spirostomum minus</i>         | <b>MK688532</b>     | 1670        | 48.2   | <b>MK721443</b>     | 241         | 53.1   | <b>MK713385</b>     | 630         | 57.6   | <b>MK721483</b>     | 950         | 58.8   | <b>MK721518</b>     | 687         | 29.8   |                                 | Freshwater pond, Myeongdo-ri, Uljin-eup, Uljin, Gyeongbuk, South Korea                         | February 2015                                    | Present study                |  |
| SKS940        | <i>Spirostomum minus</i>         | <b>MK688533</b>     | 1671        | 48.2   | <b>MK721444</b>     | 254         | 53.9   | <b>MK713386</b>     | 694         | 57.2   | ----                | ----        | ----   | ----                | ----        | ----   |                                 | Freshwater pond, Myeongdo-ri, Uljin-eup, Uljin, Gyeongbuk, South Korea                         | February 2015                                    | Present study                |  |
| SKS991        | <i>Spirostomum minus</i>         | <b>MK688534</b>     | 1613        | 48.1   | <b>MK721445</b>     | 257         | 51.8   | <b>MK713387</b>     | 579         | 57.7   | ----                | ----        | ----   | ----                | ----        | ----   |                                 | Freshwater wetland (Guemsa wetland), Geumsa-ri, Geumsa-myeon, Yeosu, Gyeonggi, South Korea     | August 2007                                      | Present study                |  |
| DoEng         | <i>Spirostomum semivirescens</i> | MH295830            | 1722        | 47.7   | MH295830            | 254         | 54.3   | MH295831            | 757         | 55.7   | ----                | ----        | ----   | ----                | ----        | ----   |                                 | Freshwater fen pond, Dorset, South England                                                     | June 2015                                        | Hines <i>et al.</i> (2018)   |  |
| GuaCHN        | <i>Spirostomum</i> sp.           | FJ998027            | 1718        | 48.1   | KM222081            | 258         | 55.8   | KM222170            | 691         | 55.1   | ----                | ----        | ----   | ----                | ----        | ----   |                                 | Freshwater pond in the campus of the South China Normal University, Guangzhou                  | Not provided                                     | Gao <i>et al.</i> (2016)     |  |
| StMgN         | <i>Spirostomum</i> sp.           | HG939526            | 1702        | 48.0   | HG939526            | 252         | 55.4   | HG939526            | 490         | 54.1   | ----                | ----        | ----   | ----                | ----        | ----   |                                 | Freshwater stream in a forest, Mandena, Madagascar                                             | January 2012                                     | Boscaro <i>et al.</i> (2014) |  |
| StJfp2        | <i>Spirostomum</i> sp.           | HG939531            | 1702        | 48.1   | HG939531            | 251         | 55.0   | HG939531            | 563         | 56.1   | ----                | ----        | ----   | ----                | ----        | ----   |                                 | Freshwater eutrophic stream, (Sao Pedro stream) Juiz de Fora, Brazil                           | June 2012                                        | Boscaro <i>et al.</i> (2014) |  |
| SmJfp1        | <i>Spirostomum</i> sp.           | HG939541            | 1702        | 47.7   | HG939541            | 257         | 52.3   | HG939541            | 481         | 53.6   | ----                | ----        | ----   | ----                | ----        | ----   |                                 | Freshwater eutrophic stream, (Sao Pedro stream), Juiz de Fora, Brazil                          | February 2013                                    | Boscaro <i>et al.</i> (2014) |  |

| Population ID   | Species name                | 18S rRNA            |             |        | ITS1-5.8S-ITS2      |             |        | 28S rRNA            |             |        | a-tubulin           |             |        | COI                 |             |        | Habitat and collection location                                                                 | Collection date | References                   |
|-----------------|-----------------------------|---------------------|-------------|--------|---------------------|-------------|--------|---------------------|-------------|--------|---------------------|-------------|--------|---------------------|-------------|--------|-------------------------------------------------------------------------------------------------|-----------------|------------------------------|
|                 |                             | GB accession number | Length (nt) | GC (%) | GB accession number | Length (nt) | GC (%) | GB accession number | Length (nt) | GC (%) | GB accession number | Length (nt) | GC (%) | GB accession number | Length (nt) | GC (%) |                                                                                                 |                 |                              |
| Thd2            | <i>Spirostomum</i> sp.      | HG939542            | 1702        | 47.6   | HG939542            | 257         | 51.8   | HG939542            | 528         | 55.1   | ----                | ----        | ----   | ----                | ----        | ----   | Freshwater eutrophic stream, Vung Tau, Thailand                                                 | November 2011   | Boscaro <i>et al.</i> (2014) |
| Ind             | <i>Spirostomum</i> sp.      | HG939544            | 1702        | 47.4   | HG939544            | 257         | 52.1   | HG939544            | 528         | 54.5   | ----                | ----        | ----   | ----                | ----        | ----   | Freshwater pond in cave (Borra Caves) Visakhapatnam, India                                      | March 2013      | Boscaro <i>et al.</i> (2014) |
| Seef2           | <i>Spirostomum</i> sp.      | HG939552            | 1702        | 47.8   | HG939552            | 257         | 56.0   | HG939552            | 527         | 53.3   | ----                | ----        | ----   | ----                | ----        | ----   | Freshwater lake (Wildsee Lake) Seefeld in Tirol, Austria                                        | August 2013     | Boscaro <i>et al.</i> (2014) |
| SKS255          | <i>Spirostomum</i> sp.      | KU848234            | 1617        | 48.4   | KR861711            | 256         | 53.9   | KU848218            | 761         | 55.5   | ----                | ----        | ----   | ----                | ----        | ----   | Freshwater pond in Dongbaekdongsan Hill, Seonheul-ri, Jocheon-eup, Jeju, South Korea            | September 2012  | Shazib <i>et al.</i> (2016)  |
| Zur3            | <i>Spirostomum subtilis</i> | HG939550            | 1702        | 47.1   | HG939550            | 257         | 56.0   | HG939550            | 528         | 53.0   | ----                | ----        | ----   | ----                | ----        | ----   | Freshwater sample from the Zurichsee, Arboretum, Zurich, Switzerland                            | February 2013   | Boscaro <i>et al.</i> (2014) |
| SKS1056         | <i>Spirostomum subtilis</i> | <b>MK688540</b>     | 1623        | 47.5   | <b>MK721451</b>     | 257         | 56.0   | <b>MK713393</b>     | 512         | 55.3   | <b>MK721489</b>     | 950         | 56.9   | <b>MK721524</b>     | 696         | 27.7   | Freshwater pond, Gangdong-dong, Gangseo-gu, Busan, South Korea                                  | June 2016       | Present study                |
| SKS937          | <i>Spirostomum subtilis</i> | <b>MK688539</b>     | 1670        | 47.4   | <b>MK721450</b>     | 257         | 56.0   | <b>MK713392</b>     | 694         | 55.9   | <b>MK721488</b>     | 950         | 57.1   | <b>MK721523</b>     | 696         | 27.2   | Freshwater pond, Myeongdo-ri, Uljin-eup, Uljin, Gyeongbuk, South Korea                          | February 2015   | Present study                |
| SS4-1           | <i>Spirostomum subtilis</i> | HG939549            | 1702        | 47.1   | HG939549            | 257         | 56.0   | HG939549            | 518         | 52.8   | ----                | ----        | ----   | ----                | ----        | ----   | Freshwater pond inside the Skansen Open Air Museum, Djurgarden, Stockholm, Sweden               | August 2013     | Boscaro <i>et al.</i> (2014) |
| <b>SKS085**</b> | <i>Spirostomum teres</i>    | KJ651822            | 1598        | 48.7   | <b>MK721452</b>     | 250         | 55.2   | KJ651839            | 683         | 57.8   | <b>MK721491</b>     | 950         | 56.8   | <b>MK721526</b>     | 699         | 26.3   | Freshwater stream, Gusu-ri, Eonyang-eup, Ulju-gun, Ulsan, South Korea                           | April 2012      | Shazib <i>et al.</i> (2014)  |
| SKS107          | <i>Spirostomum teres</i>    | KU848228            | 1629        | 48.5   | KR861705            | 251         | 55.0   | KU848212            | 730         | 56.4   | ----                | ----        | ----   | <b>MK721527</b>     | 663         | 26.5   | Freshwater stream (Namecheonae stream), Eoem-ri, Eonyang-eup, Ulsan, South Korea                | April 2012      | Shazib <i>et al.</i> (2016)  |
| SKS351          | <i>Spirostomum teres</i>    | KU848235            | 1670        | 48.4   | KR861712            | 251         | 55.0   | KU848219            | 584         | 56.8   | <b>MK721493</b>     | 950         | 58.5   | <b>MK721529</b>     | 699         | 25.8   | Freshwater wetland (Cheongsu Gotjawal wetland), Cheongsu-ri, Hangyeong-myeon, Jeju, South Korea | October 2011    | Shazib <i>et al.</i> (2016)  |
| <b>SKS026**</b> | <i>Spirostomum teres</i>    | <b>MK688541</b>     | 1609        | 48.6   | KJ651855            | 251         | 55.0   | <b>MK713394</b>     | 691         | 58.2   | <b>MK721490</b>     | 929         | 58.4   | <b>MK721525</b>     | 681         | 26.1   | Freshwater wetland, Cheongsu-ri, Hangyeong-myeon, Jeju, South Korea                             | January 2012    | Shazib <i>et al.</i> (2016)  |
| SKS1045         | <i>Spirostomum teres</i>    | <b>MK688544</b>     | 1624        | 48.2   | <b>MK721455</b>     | 255         | 53.7   | <b>MK713397</b>     | 691         | 56.7   | <b>MK721494</b>     | 950         | 58.7   | <b>MK721531</b>     | 699         | 29.8   | Freshwater reservoir (Cheonjinho), Bongpo-ri, Toseong-myeon, Goseong-gun, Gangwon, South Korea  | January 2016    | Present study                |
| SKS187          | <i>Spirostomum teres</i>    | <b>MK688542</b>     | 1673        | 48.4   | <b>MK721453</b>     | 251         | 55.0   | <b>MK713395</b>     | 691         | 57.5   | <b>MK721492</b>     | 950         | 56.9   | <b>MK721528</b>     | 699         | 26.2   | Freshwater from natural wetland in Ulsan Grand Park, Sinjeong-dong, Ulsan, South Korea          | June 2012       | Present study                |
| SKS988          | <i>Spirostomum teres</i>    | <b>MK688543</b>     | 1612        | 48.6   | <b>MK721454</b>     | 251         | 55.0   | <b>MK713396</b>     | 691         | 57.5   | ----                | ----        | ----   | <b>MK721530</b>     | 699         | 26.3   | Freshwater pond, Gyeong-ri, Beomseo-eup, Ulsan, South Korea                                     | February 2007   | Present study                |
| EU199           | <i>Spirostomum teres</i>    | AM398199            | 1701        | 48.1   | AM398199            | 251         | 55.0   | AM398199            | 581         | 55.9   | ----                | ----        | ----   | ----                | ----        | ----   | Not provided                                                                                    | Not provided    | Schmidt <i>et al.</i> (2007) |
| Mdg2-1          | <i>Spirostomum teres</i>    | HG939524            | 1702        | 48.1   | HG939524            | 254         | 54.3   | HG939524            | 429         | 53.1   | ----                | ----        | ----   | ----                | ----        | ----   | Fresh water lake in Ambandrika, Sainte Luce, Madagascar                                         | June 2011       | Boscaro <i>et al.</i> (2014) |
| Seef1           | <i>Spirostomum teres</i>    | HG939525            | 1702        | 48.1   | HG939525            | 254         | 54.3   | HG939525            | 435         | 53.1   | ----                | ----        | ----   | ----                | ----        | ----   | Freshwater lake (Wildsee Lake) Seefeld in Tirol, Austria                                        | August 2013     | Boscaro <i>et al.</i> (2014) |
| NorBG           | <i>Spirostomum teres</i>    | HG939527            | 1702        | 48.1   | HG939527            | 251         | 55.0   | HG939527            | 525         | 55.0   | ----                | ----        | ----   | ----                | ----        | ----   | Freshwater (artificial) pond, University                                                        | August 2013     | Boscaro <i>et al.</i> (2014) |



| Population ID | Species name              | 18S rRNA            |             |        | ITS1-5.8S-ITS2      |             |        | 28S rRNA            |             |        | a-tubulin           |             |        | COI                 |             |                                                                                                                 | Habitat and collection location                                                            | Collection date                | References    |
|---------------|---------------------------|---------------------|-------------|--------|---------------------|-------------|--------|---------------------|-------------|--------|---------------------|-------------|--------|---------------------|-------------|-----------------------------------------------------------------------------------------------------------------|--------------------------------------------------------------------------------------------|--------------------------------|---------------|
|               |                           | GB accession number | Length (nt) | GC (%) | GB accession number | Length (nt) | GC (%) | GB accession number | Length (nt) | GC (%) | GB accession number | Length (nt) | GC (%) | GB accession number | Length (nt) | GC (%)                                                                                                          |                                                                                            |                                |               |
|               |                           |                     |             |        |                     |             |        |                     |             |        |                     |             |        |                     |             | Botanical Garden, Oslo, Norway                                                                                  |                                                                                            |                                |               |
| NorKD         | <i>Spirostomum teres</i>  | HG939528            | 1702        | 48.1   | HG939528            | 251         | 55.0   | HG939528            | 478         | 54.2   | ----                | ----        | ----   | ----                | ----        | Freshwater artificial pond, Royal Palace Park, Oslo, Norway                                                     | August 2013                                                                                | Boscaro <i>et al.</i> (2014)   |               |
| PFEU3Sm2      | <i>Spirostomum teres</i>  | HG939529            | 1702        | 48.1   | HG939529            | 251         | 55.0   | HG939529            | 471         | 54.1   | ----                | ----        | ----   | ----                | ----        | Freshwater eutrophic marsh, (Fucecchio Marsh), Pistoia, Italy                                                   | September 2012                                                                             | Boscaro <i>et al.</i> (2014)   |               |
| PF1a          | <i>Spirostomum teres</i>  | HG939532            | 1702        | 47.9   | HG939532            | 250         | 55.6   | HG939532            | 561         | 56.0   | ----                | ----        | ----   | ----                | ----        | Freshwater oligotrophic marsh, (Fucecchio Marsh), Pistoia, Italy                                                | October 2013                                                                               | Boscaro <i>et al.</i> (2014)   |               |
| Mdg3          | <i>Spirostomum teres</i>  | HG939538            | 1702        | 48.2   | HG939538            | 253         | 53.0   | HG939538            | 520         | 55.4   | ----                | ----        | ----   | ----                | ----        | Brackish (1.0%) lake, Ambandrika, Sainte Luce, Madagascar                                                       | July 2011                                                                                  | Boscaro <i>et al.</i> (2014)   |               |
| SPT           | <i>Spirostomum teres</i>  | KP970241            | 1643        | 48.3   | KP970295            | 256         | 53.1   | KP970268            | 691         | 56.9   | ----                | ----        | ----   | ----                | ----        | Sludge treatment plant in Rio de Janeiro, Brazil                                                                | Not provided                                                                               | Fernandes <i>et al.</i> (2016) |               |
| JpH1020       | <i>Spirostomum yagiui</i> | <b>MK688553</b>     | 1671        | 48.1   | <b>MK721465</b>     | 253         | 53.0   | <b>MK713407</b>     | 689         | 57.9   | ----                | ----        | ----   | ----                | ----        | Freshwater, Hiroshima, Japan, sample from Prof. Suzuki T. (Kobe University, Japan)                              | 2013                                                                                       | Present study                  |               |
| SKS315        | <i>Spirostomum yagiui</i> | <b>MK688547</b>     | 1676        | 48.2   | <b>MK721458</b>     | 253         | 53.0   | <b>MK713400</b>     | 689         | 57.9   | ----                | ----        | ----   | ----                | ----        | Brackish water (Geowugae wetland), Pyoseon-ri, Pyoseon-myeon, Seogwipo, Jeju, South Korea                       | November 2012                                                                              | Present study                  |               |
| SKS583        | <i>Spirostomum yagiui</i> | <b>MK688548</b>     | 1672        | 48.1   | <b>MK721459</b>     | 253         | 53.0   | <b>MK713401</b>     | 689         | 57.9   | ----                | ----        | ----   | ----                | ----        | Brackish water (salinity 11‰, Taehwa river), Samsan-dong, Ulsan, South Korea                                    | January 2014                                                                               | Present study                  |               |
| SKS977        | <i>Spirostomum yagiui</i> | <b>MK688551</b>     | 1671        | 48.1   | <b>MK721463</b>     | 253         | 53.0   | <b>MK713405</b>     | 689         | 57.9   | <b>MK721496</b>     | 950         | 57.1   | <b>MK721535</b>     | 696         | 28.9                                                                                                            | Freshwater pond (Jeonggol pond), Mugeo-dong, Ulsan, South Korea                            | August 2015                    | Present study |
| SKS983        | <i>Spirostomum yagiui</i> | <b>MK688552</b>     | 1671        | 48.1   | <b>MK721464</b>     | 253         | 53.0   | <b>MK713406</b>     | 689         | 57.9   | ----                | ----        | ----   | ----                | ----        | Freshwater pond (Jeonggol pond), Mugeo-dong, Ulsan, South Korea                                                 | August 2015                                                                                | Present study                  |               |
| LarnCyp       | <i>Spirostomum yagiui</i> | HG939533            | 1702        | 47.9   | HG939533            | 253         | 53.0   | HG939533            | 561         | 56.9   | ----                | ----        | ----   | ----                | ----        | Brackish (0.5%) littoral stream, Larnaca, Republic Of Cyprus                                                    | August 2012                                                                                | Boscaro <i>et al.</i> (2014)   |               |
| SpirWS        | <i>Spirostomum yagiui</i> | HG939534            | 1702        | 47.9   | HG939534            | 253         | 53.0   | HG939534            | 561         | 56.9   | ----                | ----        | ----   | ----                | ----        | Brackish (1.5%) littoral zone of Kerit Island, in the Kandalashka Gulf (Republic of Karelia, White Sea), Russia | August 2011                                                                                | Boscaro <i>et al.</i> (2014)   |               |
| GNS4          | <i>Spirostomum yagiui</i> | HG939535            | 1702        | 47.9   | HG939535            | 253         | 53.0   | HG939535            | 426         | 53.1   | ----                | ----        | ----   | ----                | ----        | Brackish (1.0%) littoral zone, North Sea, Duhnen, Germany                                                       | August 2013                                                                                | Boscaro <i>et al.</i> (2014)   |               |
| Pozz          | <i>Spirostomum yagiui</i> | HG939536            | 1702        | 47.9   | HG939536            | 253         | 53.0   | HG939536            | 412         | 52.9   | ----                | ----        | ----   | ----                | ----        | Freshwater pond near the littoral zone, Pozzallo, Ragusa, Italy                                                 | October 2013                                                                               | Boscaro <i>et al.</i> (2014)   |               |
| SKS164        | <i>Spirostomum yagiui</i> | <b>MK688545</b>     | 1674        | 48.1   | <b>MK721456</b>     | 253         | 53.0   | <b>MK713398</b>     | 689         | 57.9   | <b>MK721497</b>     | 950         | 57.2   | <b>MK721533</b>     | 657         | 28.3                                                                                                            | Brackish water (Deahwacheon stream), Mopo-ri, Janggi-myeon, Pohang, Gyeongbuk, South Korea | March 2012                     | Present study |
| SKS165        | <i>Spirostomum yagiui</i> | <b>MK688546</b>     | 1607        | 48.4   | <b>MK721457</b>     | 253         | 53.0   | <b>MK713399</b>     | 689         | 57.9   | ----                | ----        | ----   | ----                | ----        | Brackish water (Deahwacheon stream), Mopo-ri, Janggi-myeon, Pohang, Gyeongbuk, South Korea                      | March 2012                                                                                 | Present study                  |               |
| SKS963        | <i>Spirostomum yagiui</i> | <b>MK688549</b>     | 1610        | 48.3   | <b>MK721461</b>     | 253         | 53.0   | <b>MK713403</b>     | 689         | 57.9   | ----                | ----        | ----   | ----                | ----        | Brackish water (Taehwa river, Samho bridge), Taehwa-dong, Ulsan, South Korea                                    | June 2015                                                                                  | Present study                  |               |
| SKS964        | <i>Spirostomum yagiui</i> | <b>MK688550</b>     | 1671        | 48.1   | <b>MK721462</b>     | 253         | 53.0   | <b>MK713404</b>     | 689         | 57.9   | ----                | ----        | ----   | ----                | ----        | Brackish water (Taehwa river, Bamboo park                                                                       | June 2015                                                                                  | Present study                  |               |

| Population ID | Species name              | 18S rRNA            |             |        | ITS1-5.8S-ITS2      |             |        | 28S rRNA            |             |        | a-tubulin           |             |        | COI                 |             |        | Habitat and collection location                                                                    | Collection date | References                  |
|---------------|---------------------------|---------------------|-------------|--------|---------------------|-------------|--------|---------------------|-------------|--------|---------------------|-------------|--------|---------------------|-------------|--------|----------------------------------------------------------------------------------------------------|-----------------|-----------------------------|
|               |                           | GB accession number | Length (nt) | GC (%) | GB accession number | Length (nt) | GC (%) | GB accession number | Length (nt) | GC (%) | GB accession number | Length (nt) | GC (%) | GB accession number | Length (nt) | GC (%) |                                                                                                    |                 |                             |
|               |                           |                     |             |        |                     |             |        |                     |             |        |                     |             |        |                     |             |        | north), Taehwa-dong, Ulsan, South Korea                                                            |                 |                             |
| SKS071        | <i>Spirostomum yagiui</i> | KU848227            | 1682        | 48.0   | KR861704            | 253         | 53.0   | KU848211            | 762         | 57.0   | <b>MK721495</b>     | 950         | 57.1   | <b>MK721532</b>     | 696         | 29.0   | Estuarine brackish water (salinity 0.6 ‰), Woldaecheon stream, Jeju, South Korea                   | February 2012   | Shazib <i>et al.</i> (2016) |
| SKS787        | <i>Spirostomum yagiui</i> | KX119519            | 1668        | 48.1   | <b>MK721460</b>     | 253         | 53.0   | <b>MK713402</b>     | 689         | 57.9   | ----                | ----        | ----   | <b>MK721534</b>     | 624         | 24.5   | Estuarine brackish water (salinity 1‰) in Geumjin-ri, Okgye-myeon, Gangneung, Gangwon, South Korea | June 2014       | Chen <i>et al.</i> (2017)   |

**Supplementary Table S2.** Inter- and intraspecific variability of five genetic markers in *Spirostomum* species.

| Alignment                               | No. of clones | Mean divergence | Standard error | Minimum divergence | Maximum divergence |
|-----------------------------------------|---------------|-----------------|----------------|--------------------|--------------------|
| <b>89 taxa</b>                          |               |                 |                |                    |                    |
| <b>18S rRNA</b>                         |               |                 |                |                    |                    |
| <i>Spirostomum ambiguum</i>             | 15            | 0.13%           | 0.06%          | 0.00%              | 0.32%              |
| <i>Spirostomum caudatum</i>             | 2             | 0.32%           | 0.14%          | ---                | ---                |
| <i>Spirostomum minus</i>                | 24            | 0.37%           | 0.09%          | 0.00%              | 0.96%              |
| <i>Spirostomum subtilis</i>             | 4             | 0.00%           | 0.00%          | 0.00%              | 0.00%              |
| <i>Spirostomum teres</i>                | 16            | 0.53%           | 0.10%          | 0.00%              | 1.66%              |
| <i>Spirostomum yagiui</i>               | 15            | 0.00%           | 0.00%          | 0.00%              | 0.00%              |
| <i>Spirostomum</i> spp. (interspecific) | 81            | 1.68%           | 0.01%          | 0.13%              | 3.19%              |
| All <i>Spirostomum</i> spp.             | 86            | 1.41%           | 0.20%          | 0.00%              | 3.19%              |
| <b>ITS1-5.8S-ITS2 regions</b>           |               |                 |                |                    |                    |
| <i>Spirostomum ambiguum</i>             | 15            | 0.05%           | 0.05%          | 0.00%              | 0.39%              |
| <i>Spirostomum caudatum</i>             | 2             | 1.58%           | 0.76%          | ---                | ---                |
| <i>Spirostomum minus</i>                | 24            | 2.57%           | 0.57%          | 0.00%              | 7.09%              |
| <i>Spirostomum subtilis</i>             | 4             | 0.00%           | 0.00%          | 0.00%              | 0.00%              |
| <i>Spirostomum teres</i>                | 16            | 3.39%           | 0.64%          | 0.00%              | 8.37%              |
| <i>Spirostomum yagiui</i>               | 15            | 0.00%           | 0.00%          | 0.00%              | 0.00%              |
| <i>Spirostomum</i> spp. (interspecific) | 81            | 9.61%           | 0.06%          | 0.40%              | 14.74%             |
| All <i>Spirostomum</i> spp.             | 86            | 8.02%           | 1.06%          | 0.00%              | 14.74%             |
| <b>D1D2 region of 28S rRNA</b>          |               |                 |                |                    |                    |
| <i>Spirostomum ambiguum</i>             | 15            | 0.23%           | 0.12%          | 0.00%              | 0.58%              |
| <i>Spirostomum caudatum</i>             | 2             | 2.04%           | 0.50%          | ---                | ---                |
| <i>Spirostomum minus</i>                | 24            | 1.91%           | 0.34%          | 0.00%              | 6.60%              |
| <i>Spirostomum subtilis</i>             | 4             | 0.52%           | 0.25%          | 0.00%              | 0.90%              |
| <i>Spirostomum teres</i>                | 16            | 2.32%           | 0.40%          | 0.00%              | 5.02%              |
| <i>Spirostomum yagiui</i>               | 15            | 0.00%           | 0.00%          | 0.00%              | 0.00%              |
| <i>Spirostomum</i> spp. (interspecific) | 81            | 5.66%           | 0.04%          | 0.00%              | 10.95%             |
| All <i>Spirostomum</i> spp.             | 86            | 4.91%           | 0.54%          | 0.00%              | 10.95%             |



| Alignment                               | No. of clones | Mean divergence | Standard error | Minimum divergence | Maximum divergence |
|-----------------------------------------|---------------|-----------------|----------------|--------------------|--------------------|
| <b>38 taxa<br/>18S rRNA</b>             |               |                 |                |                    |                    |
| <i>Spirostomum ambiguum</i>             | 9             | 0.12%           | 0.06           | 0.00%              | 0.25%              |
| <i>Spirostomum minus</i>                | 14            | 0.01%           | 0.01%          | 0.00%              | 0.06%              |
| <i>Spirostomum subtilis</i>             | 2             | 0.00%           | 0.00%          | ---                | ---                |
| <i>Spirostomum teres</i>                | 7             | 0.31%           | 0.08%          | 0.00%              | 0.76%              |
| <i>Spirostomum yagiui</i>               | 4             | 0.00%           | 0.00%          | 0.00%              | 0.00%              |
| <i>Spirostomum</i> spp. (interspecific) | 37            | 1.71%           | 0.02%          | 0.70%              | 3.30%              |
| All <i>Spirostomum</i> spp.             | 37            | 1.33%           | 0.17%          | 0.00%              | 3.30%              |
| <b>ITS1-5.8S-ITS2 regions</b>           |               |                 |                |                    |                    |
| <i>Spirostomum ambiguum</i>             | 9             | 0.00%           | 0.00%          | 0.00%              | 0.00%              |
| <i>Spirostomum minus</i>                | 14            | 0.28%           | 0.17%          | 0.00%              | 1.28%              |
| <i>Spirostomum subtilis</i>             | 2             | 0.00%           | 0.00%          | ---                | ---                |
| <i>Spirostomum teres</i>                | 7             | 2.12%           | 0.54%          | 0.00%              | 5.98%              |
| <i>Spirostomum yagiui</i>               | 4             | 0.00%           | 0.00%          | 0.00%              | 0.00%              |
| <i>Spirostomum</i> spp. (interspecific) | 37            | 8.61%           | 0.16%          | 1.28%              | 13.68%             |
| All <i>Spirostomum</i> spp.             | 37            | 6.71%           | 1.00%          | 0.00%              | 13.68%             |
| <b>D1D2 region of 28S rRNA</b>          |               |                 |                |                    |                    |
| <i>Spirostomum ambiguum</i>             | 9             | 0.19%           | 0.13%          | 0.00%              | 0.42%              |
| <i>Spirostomum minus</i>                | 14            | 0.00%           | 0.00%          | 0.00%              | 0.00%              |
| <i>Spirostomum subtilis</i>             | 2             | 0.00%           | 0.00%          | ---                | ---                |
| <i>Spirostomum teres</i>                | 7             | 1.66%           | 0.36%          | 0.00%              | 4.42%              |
| <i>Spirostomum yagiui</i>               | 4             | 0.00%           | 0.00%          | 0.00%              | 0.00%              |
| <i>Spirostomum</i> spp. (interspecific) | 37            | 6.41%           | 0.10%          | 2.74%              | 9.68%              |
| All <i>Spirostomum</i> spp.             | 37            | 4.98%           | 0.61%          | 0.00%              | 9.68%              |
| <b>mt CO1 region</b>                    |               |                 |                |                    |                    |
| <i>Spirostomum ambiguum</i> (nt)        | 9             | 11.63%          | 0.80%          | 0.00%              | 20.46%             |
| <i>Spirostomum ambiguum</i> (aa)        | 9             | 8.67%           | 1.41%          | 0.00%              | 15.87%             |
| <i>Spirostomum minus</i> (nt)           | 14            | 0.44%           | 0.13%          | 0.00%              | 2.47%              |
| <i>Spirostomum minus</i> (aa)           | 14            | 0.23%           | 0.13%          | 0.00%              | 1.59%              |

| <b>Alignment</b>                             | <b>No. of clones</b> | <b>Mean divergence</b> | <b>Standard error</b> | <b>Minimum divergence</b> | <b>Maximum divergence</b> |
|----------------------------------------------|----------------------|------------------------|-----------------------|---------------------------|---------------------------|
| <i>Spirostomum subtilis</i> (nt)             | 2                    | 1.41%                  | 0.49%                 | ---                       | ---                       |
| <i>Spirostomum subtilis</i> (aa)             | 2                    | 0.53%                  | 0.51%                 | ---                       | ---                       |
| <i>Spirostomum teres</i> (nt)                | 7                    | 10.25%                 | 0.74%                 | 0.00%                     | 20.81%                    |
| <i>Spirostomum teres</i> (aa)                | 7                    | 8.57%                  | 1.32%                 | 0.00%                     | 17.99%                    |
| <i>Spirostomum yagiui</i> (nt)               | 4                    | 8.35%                  | 0.81%                 | 1.23%                     | 12.70%                    |
| <i>Spirostomum yagiui</i> (aa)               | 4                    | 4.14%                  | 1.02                  | 0.00%                     | 7.94%                     |
| <i>Spirostomum</i> spp. (interspecific) (nt) | 37                   | 24.98%                 | 0.14%                 | 16.75%                    | 30.34%                    |
| <i>Spirostomum</i> spp. (interspecific) (aa) | 37                   | 23.28%                 | 0.14%                 | 14.29%                    | 30.16%                    |
| All <i>Spirostomum</i> spp. (nt)             | 37                   | 20.26%                 | 0.89%                 | 0.00%                     | 30.34%                    |
| All <i>Spirostomum</i> spp. (aa)             | 37                   | 18.67%                 | 1.94%                 | 0.00%                     | 30.16%                    |
| <b>mt CO1 region (without insert)</b>        |                      |                        |                       |                           |                           |
| <i>Spirostomum ambiguum</i> (nt)             | 9                    | 8.58%                  | 1.08%                 | 0.00%                     | 15.25%                    |
| <i>Spirostomum ambiguum</i> (aa)             | 9                    | 0.53%                  | 0.51%                 | 0.00%                     | 1.06%                     |
| <i>Spirostomum minus</i> (nt)                | 14                   | 0.30%                  | 0.12%                 | 0.00%                     | 2.13%                     |
| <i>Spirostomum minus</i> (aa)                | 14                   | 0.00%                  | 0.00%                 | 0.00%                     | 0.00%                     |
| <i>Spirostomum subtilis</i> (nt)             | 2                    | 2.13%                  | 0.85%                 | ---                       | ---                       |
| <i>Spirostomum subtilis</i> (aa)             | 2                    | 0.00%                  | 0.00%                 | ---                       | ---                       |
| <i>Spirostomum teres</i> (nt)                | 7                    | 8.37%                  | 1.06%                 | 0.00%                     | 17.02%                    |
| <i>Spirostomum teres</i> (aa)                | 7                    | 1.62%                  | 0.89%                 | 0.00%                     | 3.19%                     |
| <i>Spirostomum yagiui</i> (nt)               | 4                    | 6.50%                  | 1.06%                 | 1.42%                     | 9.57%                     |
| <i>Spirostomum yagiui</i> (aa)               | 4                    | 0.53%                  | 0.51%                 | 0.00%                     | 1.06%                     |
| <i>Spirostomum</i> spp. (interspecific) (nt) | 37                   | 17.17%                 | 0.08%                 | 11.70%                    | 20.92%                    |
| <i>Spirostomum</i> spp. (interspecific) (aa) | 37                   | 3.30%                  | 0.06%                 | 1.06%                     | 7.45%                     |
| All <i>Spirostomum</i> spp. (nt)             | 37                   | 14.00%                 | 1.26%                 | 0.00%                     | 20.92%                    |
| All <i>Spirostomum</i> spp. (aa)             | 37                   | 2.62%                  | 0.86%                 | 0.00%                     | 7.45%                     |
| <b>32 taxa</b>                               |                      |                        |                       |                           |                           |
| <b>18S rRNA</b>                              |                      |                        |                       |                           |                           |
| <i>Spirostomum ambiguum</i>                  | 7                    | 0.14%                  | 0.07%                 | 0.00%                     | 0.25%                     |
| <i>Spirostomum minus</i>                     | 13                   | 0.01%                  | 0.01%                 | 0.00%                     | 0.06%                     |
| <i>Spirostomum subtilis</i>                  | 2                    | 0.00%                  | 0.00%                 | ---                       | ---                       |
| <i>Spirostomum teres</i>                     | 5                    | 0.39%                  | 0.10%                 | 0.00%                     | 0.76%                     |

| <b>Alignment</b>                        | <b>No. of clones</b> | <b>Mean divergence</b> | <b>Standard error</b> | <b>Minimum divergence</b> | <b>Maximum divergence</b> |
|-----------------------------------------|----------------------|------------------------|-----------------------|---------------------------|---------------------------|
| <i>Spirostomum yagiui</i>               | 3                    | 0.00%                  | 0.00%                 | 0.00%                     | 0.00%                     |
| <i>Spirostomum</i> spp. (interspecific) | 31                   | 1.72%                  | 0.03%                 | 0.70%                     | 3.30%                     |
| All <i>Spirostomum</i> spp.             | 31                   | 1.32%                  | 0.17%                 | 0.00%                     | 3.30%                     |
| <b>ITS1-5.8S-ITS2 regions</b>           |                      |                        |                       |                           |                           |
| <i>Spirostomum ambiguuum</i>            | 7                    | 0.00%                  | 0.00%                 | 0.00%                     | 0.00%                     |
| <i>Spirostomum minus</i>                | 13                   | 0.30%                  | 0.18%                 | 0.00%                     | 1.28%                     |
| <i>Spirostomum subtilis</i>             | 2                    | 0.00%                  | 0.00%                 | ---                       | ---                       |
| <i>Spirostomum teres</i>                | 5                    | 2.82%                  | 0.74%                 | 0.00%                     | 5.98%                     |
| <i>Spirostomum yagiui</i>               | 3                    | 0.00%                  | 0.00%                 | 0.00%                     | 0.00%                     |
| <i>Spirostomum</i> spp. (interspecific) | 31                   | 8.46%                  | 0.19%                 | 1.28%                     | 13.68%                    |
| All <i>Spirostomum</i> spp.             | 31                   | 6.51%                  | 1.01%                 | 0.00%                     | 13.68%                    |
| <b>D1D2 region of 28S rRNA</b>          |                      |                        |                       |                           |                           |
| <i>Spirostomum ambiguuum</i>            | 7                    | 0.22%                  | 0.15%                 | 0.00%                     | 0.42%                     |
| <i>Spirostomum minus</i>                | 13                   | 0.00%                  | 0.00%                 | 0.00%                     | 0.00%                     |
| <i>Spirostomum subtilis</i>             | 2                    | 0.00%                  | 0.00%                 | ---                       | ---                       |
| <i>Spirostomum teres</i>                | 5                    | 2.19%                  | 0.44%                 | 0.00%                     | 4.42%                     |
| <i>Spirostomum yagiui</i>               | 3                    | 0.00%                  | 0.00%                 | 0.00%                     | 0.00%                     |
| <i>Spirostomum</i> spp. (interspecific) | 31                   | 6.32%                  | 0.12%                 | 2.74%                     | 9.68%                     |
| All <i>Spirostomum</i> spp.             | 31                   | 4.84%                  | 0.60%                 | 0.00%                     | 9.68%                     |
| <b>alpha tubulin</b>                    |                      |                        |                       |                           |                           |
| <i>Spirostomum ambiguuum</i> (nt)       | 7                    | 0.15%                  | 0.08%                 | 0.00%                     | 0.32%                     |
| <i>Spirostomum ambiguuum</i> (aa)       | 7                    | 0.00%                  | 0.00%                 | 0.00%                     | 0.00%                     |
| <i>Spirostomum minus</i> (nt)           | 13                   | 0.07%                  | 0.03%                 | 0.00%                     | 0.32%                     |
| <i>Spirostomum minus</i> (aa)           | 13                   | 0.00%                  | 0.00%                 | 0.00%                     | 0.00%                     |
| <i>Spirostomum subtilis</i> (nt)        | 2                    | 0.11%                  | 0.11%                 | ---                       | ---                       |
| <i>Spirostomum subtilis</i> (aa)        | 2                    | 0.00%                  | 0.00%                 | 0.00%                     | 0.00%                     |
| <i>Spirostomum teres</i> (nt)           | 5                    | 7.41%                  | 0.64%                 | 0.00%                     | 10.01%                    |
| <i>Spirostomum teres</i> (aa)           | 5                    | 0.00%                  | 0.00%                 | 0.00%                     | 0.00%                     |
| <i>Spirostomum yagiui</i> (nt)          | 3                    | 0.36%                  | 0.16%                 | 0.32%                     | 0.43%                     |
| <i>Spirostomum yagiui</i> (aa)          | 3                    | 0.00%                  | 0.00%                 | 0.00%                     | 0.00%                     |



| <b>Alignment</b>                             | <b>No. of clones</b> | <b>Mean divergence</b> | <b>Standard error</b> | <b>Minimum divergence</b> | <b>Maximum divergence</b> |
|----------------------------------------------|----------------------|------------------------|-----------------------|---------------------------|---------------------------|
| <i>Spirostomum</i> spp. (interspecific) (nt) | 31                   | 10.82%                 | 0.06%                 | 7.21%                     | 12.81%                    |
| <i>Spirostomum</i> spp. (interspecific) (aa) | 31                   | 0.00%                  | 0.00%                 | 0.00%                     | 0.00%                     |
| All <i>Spirostomum</i> spp. (nt)             | 31                   | 8.37%                  | 0.60%                 | 0.00%                     | 12.81%                    |
| All <i>Spirostomum</i> spp. (aa)             | 31                   | 0.00%                  | 0.00%                 | 0.00%                     | 0.00%                     |
| <b>mt CO1 region</b>                         |                      |                        |                       |                           |                           |
| <i>Spirostomum ambiguuum</i> (nt)            | 7                    | 12.83%                 | 0.87%                 | 0.00%                     | 19.31%                    |
| <i>Spirostomum ambiguuum</i> (aa)            | 7                    | 8.94%                  | 1.40%                 | 0.00%                     | 14.08%                    |
| <i>Spirostomum minus</i> (nt)                | 13                   | 0.48%                  | 0.14%                 | 0.00%                     | 2.34%                     |
| <i>Spirostomum minus</i> (aa)                | 13                   | 0.22%                  | 0.12%                 | 0.00%                     | 1.40%                     |
| <i>Spirostomum subtilis</i> (nt)             | 2                    | 1.40%                  | 0.49%                 | ---                       | ---                       |
| <i>Spirostomum subtilis</i> (aa)             | 2                    | 0.47%                  | 0.44%                 | ---                       | ---                       |
| <i>Spirostomum teres</i> (nt)                | 5                    | 12.40%                 | 0.89%                 | 0.00%                     | 19.63%                    |
| <i>Spirostomum teres</i> (aa)                | 5                    | 9.95%                  | 1.49%                 | 0.00%                     | 16.43%                    |
| <i>Spirostomum yagiui</i> (nt)               | 3                    | 4.36%                  | 0.62%                 | 1.09%                     | 6.07%                     |
| <i>Spirostomum yagiui</i> (aa)               | 3                    | 0.63%                  | 0.42%                 | 0.00%                     | 0.94%                     |
| <i>Spirostomum</i> spp. (interspecific) (nt) | 31                   | 24.04%                 | 0.14%                 | 16.51%                    | 28.50%                    |
| <i>Spirostomum</i> spp. (interspecific) (aa) | 31                   | 21.43%                 | 0.16%                 | 12.21%                    | 26.76%                    |
| All <i>Spirostomum</i> spp. (nt)             | 31                   | 19.15%                 | 0.88%                 | 0.00%                     | 28.50%                    |
| All <i>Spirostomum</i> spp. (aa)             | 31                   | 16.88%                 | 1.75%                 | 0.00%                     | 26.76%                    |
| <b>mt CO1 region (without insert)</b>        |                      |                        |                       |                           |                           |
| <i>Spirostomum ambiguuum</i> (nt)            | 7                    | 9.56%                  | 1.08%                 | 0.00%                     | 14.29%                    |
| <i>Spirostomum ambiguuum</i> (aa)            | 7                    | 0.48%                  | 0.48%                 | 0.00%                     | 0.85%                     |
| <i>Spirostomum minus</i> (nt)                | 13                   | 0.39%                  | 0.16%                 | 0.00%                     | 1.96%                     |
| <i>Spirostomum minus</i> (aa)                | 13                   | 0.00%                  | 0.00%                 | 0.00%                     | 0.00%                     |
| <i>Spirostomum subtilis</i> (nt)             | 2                    | 1.96%                  | 0.73%                 | ---                       | ---                       |
| <i>Spirostomum subtilis</i> (aa)             | 2                    | 0.00%                  | 0.00%                 | ---                       | ---                       |
| <i>Spirostomum teres</i> (nt)                | 5                    | 10.25%                 | 1.08%                 | 0.00%                     | 15.97%                    |
| <i>Spirostomum teres</i> (aa)                | 5                    | 2.03%                  | 0.96%                 | 0.00%                     | 3.39%                     |
| <i>Spirostomum yagiui</i> (nt)               | 3                    | 4.29%                  | 0.86%                 | 1.12%                     | 6.16%                     |
| <i>Spirostomum yagiui</i> (aa)               | 3                    | 0.00%                  | 0.00%                 | 0.00%                     | 0.00%                     |

| <b>Alignment</b>                             | <b>No. of clones</b> | <b>Mean divergence</b> | <b>Standard error</b> | <b>Minimum divergence</b> | <b>Maximum divergence</b> |
|----------------------------------------------|----------------------|------------------------|-----------------------|---------------------------|---------------------------|
| <i>Spirostomum</i> spp. (interspecific) (nt) | 31                   | 16.70%                 | 0.07%                 | 13.17%                    | 20.17%                    |
| <i>Spirostomum</i> spp. (interspecific) (aa) | 31                   | 3.29%                  | 0.06%                 | 1.69%                     | 6.78%                     |
| All <i>Spirostomum</i> spp. (nt)             | 31                   | 13.39%                 | 1.05%                 | 0.00%                     | 20.17%                    |
| All <i>Spirostomum</i> spp. (aa)             | 31                   | 2.56%                  | 0.80%                 | 0.00%                     | 6.78%                     |

**Notes:** aa, amino acids; nt, nucleotides.



Supplementary Table S3. Numbers of nucleotide differences (above diagonal) and pairwise distances (below diagonal) of the 18S rRNA gene sequences among 86 *Spirostomum* populations.

Table with 86 rows and 86 columns. Rows are labeled with *Spirostomum* species names (e.g., 1. S. ambiguum SK563, 2. S. ambiguum SK254, etc.) and columns are numbered 1 to 86. The upper triangle shows nucleotide differences (integers), and the lower triangle shows pairwise distances (floating-point numbers). The diagonal cells are greyed out.











Supplementary Table S6. Numbers of nucleotide differences (above diagonal) and pairwise distances (%; below diagonal) of the 18S rRNA gene sequences among 37 *Spirostomum* populations.

| Taxon                          | 1    | 2    | 3    | 4    | 5    | 6    | 7    | 8    | 9    | 10   | 11   | 12   | 13   | 14   | 15   | 16   | 17   | 18   | 19   | 20   | 21   | 22   | 23   | 24   | 25   | 26   | 27   | 28   | 29   | 30   | 31   | 32   | 33   | 34   | 35   | 36   | 37 |    |
|--------------------------------|------|------|------|------|------|------|------|------|------|------|------|------|------|------|------|------|------|------|------|------|------|------|------|------|------|------|------|------|------|------|------|------|------|------|------|------|----|----|
| 1. <i>S. ambiguum</i> SKS167   |      | 0    | 4    | 4    | 4    | 4    | 4    | 4    | 4    | 44   | 21   | 22   | 22   | 22   | 22   | 22   | 22   | 22   | 22   | 22   | 22   | 22   | 22   | 22   | 22   | 33   | 33   | 40   | 40   | 38   | 38   | 40   | 38   | 38   | 36   | 36   | 36 | 36 |
| 2. <i>S. ambiguum</i> SKS254   | 0.00 |      | 4    | 4    | 4    | 4    | 4    | 4    | 4    | 44   | 21   | 22   | 22   | 22   | 22   | 22   | 22   | 22   | 22   | 22   | 22   | 22   | 22   | 22   | 22   | 33   | 33   | 40   | 40   | 38   | 38   | 40   | 38   | 38   | 36   | 36   | 36 | 36 |
| 3. <i>S. ambiguum</i> SKS779   | 0.25 | 0.25 |      | 2    | 2    | 2    | 2    | 2    | 2    | 44   | 19   | 20   | 20   | 20   | 20   | 20   | 20   | 20   | 20   | 20   | 20   | 20   | 20   | 20   | 20   | 31   | 31   | 40   | 38   | 36   | 36   | 38   | 38   | 36   | 34   | 34   | 34 | 34 |
| 4. <i>S. ambiguum</i> SKS184   | 0.25 | 0.25 | 0.13 |      | 0    | 0    | 0    | 0    | 0    | 42   | 21   | 22   | 22   | 22   | 22   | 22   | 22   | 22   | 22   | 22   | 22   | 22   | 22   | 22   | 22   | 33   | 33   | 40   | 40   | 38   | 38   | 40   | 38   | 38   | 36   | 36   | 36 | 36 |
| 5. <i>S. ambiguum</i> SKS185   | 0.25 | 0.25 | 0.13 | 0.00 |      | 0    | 0    | 0    | 0    | 42   | 21   | 22   | 22   | 22   | 22   | 22   | 22   | 22   | 22   | 22   | 22   | 22   | 22   | 22   | 22   | 33   | 33   | 40   | 40   | 38   | 38   | 40   | 38   | 38   | 36   | 36   | 36 | 36 |
| 6. <i>S. ambiguum</i> SKS989   | 0.25 | 0.25 | 0.13 | 0.00 | 0.00 |      | 0    | 0    | 0    | 42   | 21   | 22   | 22   | 22   | 22   | 22   | 22   | 22   | 22   | 22   | 22   | 22   | 22   | 22   | 22   | 33   | 33   | 40   | 40   | 38   | 38   | 40   | 38   | 38   | 36   | 36   | 36 | 36 |
| 7. <i>S. ambiguum</i> SKS363   | 0.25 | 0.25 | 0.13 | 0.00 | 0.00 | 0.00 |      | 0    | 0    | 42   | 21   | 22   | 22   | 22   | 22   | 22   | 22   | 22   | 22   | 22   | 22   | 22   | 22   | 22   | 22   | 33   | 33   | 40   | 40   | 38   | 38   | 40   | 38   | 38   | 36   | 36   | 36 | 36 |
| 8. <i>S. ambiguum</i> SKS947   | 0.25 | 0.25 | 0.13 | 0.00 | 0.00 | 0.00 | 0.00 |      | 0    | 42   | 21   | 22   | 22   | 22   | 22   | 22   | 22   | 22   | 22   | 22   | 22   | 22   | 22   | 22   | 22   | 33   | 33   | 40   | 40   | 38   | 38   | 40   | 38   | 38   | 36   | 36   | 36 | 36 |
| 9. <i>S. ambiguum</i> SKS949   | 0.25 | 0.25 | 0.13 | 0.00 | 0.00 | 0.00 | 0.00 | 0.00 |      | 42   | 21   | 22   | 22   | 22   | 22   | 22   | 22   | 22   | 22   | 22   | 22   | 22   | 22   | 22   | 22   | 33   | 33   | 40   | 40   | 38   | 38   | 40   | 38   | 38   | 36   | 36   | 36 | 36 |
| 10. <i>S. caudatum</i> SKS302  | 2.79 | 2.79 | 2.79 | 2.66 | 2.66 | 2.66 | 2.66 | 2.66 | 2.66 |      | 36   | 36   | 36   | 36   | 36   | 36   | 36   | 36   | 36   | 36   | 36   | 36   | 36   | 36   | 36   | 52   | 52   | 24   | 28   | 26   | 26   | 28   | 26   | 26   | 28   | 28   | 28 |    |
| 11. <i>S. minus</i> SKS731     | 1.33 | 1.33 | 1.20 | 1.33 | 1.33 | 1.33 | 1.33 | 1.33 | 1.33 | 2.28 |      | 1    | 1    | 1    | 1    | 1    | 1    | 1    | 1    | 1    | 1    | 1    | 1    | 1    | 1    | 24   | 24   | 32   | 26   | 22   | 22   | 26   | 22   | 22   | 23   | 23   | 23 |    |
| 12. <i>S. minus</i> SKS794     | 1.40 | 1.40 | 1.27 | 1.40 | 1.40 | 1.40 | 1.40 | 1.40 | 1.40 | 2.28 | 0.06 |      | 0    | 0    | 0    | 0    | 0    | 0    | 0    | 0    | 0    | 0    | 0    | 0    | 0    | 25   | 25   | 31   | 25   | 21   | 21   | 25   | 21   | 21   | 22   | 22   | 22 |    |
| 13. <i>S. minus</i> SKS939     | 1.40 | 1.40 | 1.27 | 1.40 | 1.40 | 1.40 | 1.40 | 1.40 | 1.40 | 2.28 | 0.06 | 0.00 |      | 0    | 0    | 0    | 0    | 0    | 0    | 0    | 0    | 0    | 0    | 0    | 0    | 25   | 25   | 31   | 25   | 21   | 21   | 25   | 21   | 21   | 22   | 22   | 22 |    |
| 14. <i>S. minus</i> SKS1044    | 1.40 | 1.40 | 1.27 | 1.40 | 1.40 | 1.40 | 1.40 | 1.40 | 1.40 | 2.28 | 0.06 | 0.00 | 0.00 |      | 0    | 0    | 0    | 0    | 0    | 0    | 0    | 0    | 0    | 0    | 0    | 25   | 25   | 31   | 25   | 21   | 21   | 25   | 21   | 21   | 22   | 22   | 22 |    |
| 15. <i>S. minus</i> GuS1058    | 1.40 | 1.40 | 1.27 | 1.40 | 1.40 | 1.40 | 1.40 | 1.40 | 1.40 | 2.28 | 0.06 | 0.00 | 0.00 | 0.00 |      | 0    | 0    | 0    | 0    | 0    | 0    | 0    | 0    | 0    | 0    | 25   | 25   | 31   | 25   | 21   | 21   | 25   | 21   | 21   | 22   | 22   | 22 |    |
| 16. <i>S. minus</i> SKS215     | 1.40 | 1.40 | 1.27 | 1.40 | 1.40 | 1.40 | 1.40 | 1.40 | 1.40 | 2.28 | 0.06 | 0.00 | 0.00 | 0.00 | 0.00 |      | 0    | 0    | 0    | 0    | 0    | 0    | 0    | 0    | 0    | 25   | 25   | 31   | 25   | 21   | 21   | 25   | 21   | 21   | 22   | 22   | 22 |    |
| 17. <i>S. minus</i> SKS214     | 1.40 | 1.40 | 1.27 | 1.40 | 1.40 | 1.40 | 1.40 | 1.40 | 1.40 | 2.28 | 0.06 | 0.00 | 0.00 | 0.00 | 0.00 | 0.00 |      | 0    | 0    | 0    | 0    | 0    | 0    | 0    | 0    | 25   | 25   | 31   | 25   | 21   | 21   | 25   | 21   | 21   | 22   | 22   | 22 |    |
| 18. <i>S. minus</i> SKS182     | 1.40 | 1.40 | 1.27 | 1.40 | 1.40 | 1.40 | 1.40 | 1.40 | 1.40 | 2.28 | 0.06 | 0.00 | 0.00 | 0.00 | 0.00 | 0.00 | 0.00 |      | 0    | 0    | 0    | 0    | 0    | 0    | 0    | 25   | 25   | 31   | 25   | 21   | 21   | 25   | 21   | 21   | 22   | 22   | 22 |    |
| 19. <i>S. minus</i> SKS840     | 1.40 | 1.40 | 1.27 | 1.40 | 1.40 | 1.40 | 1.40 | 1.40 | 1.40 | 2.28 | 0.06 | 0.00 | 0.00 | 0.00 | 0.00 | 0.00 | 0.00 | 0.00 |      | 0    | 0    | 0    | 0    | 0    | 0    | 25   | 25   | 31   | 25   | 21   | 21   | 25   | 21   | 21   | 22   | 22   | 22 |    |
| 20. <i>S. minus</i> SKS386     | 1.40 | 1.40 | 1.27 | 1.40 | 1.40 | 1.40 | 1.40 | 1.40 | 1.40 | 2.28 | 0.06 | 0.00 | 0.00 | 0.00 | 0.00 | 0.00 | 0.00 | 0.00 | 0.00 |      | 0    | 0    | 0    | 0    | 0    | 25   | 25   | 31   | 25   | 21   | 21   | 25   | 21   | 21   | 22   | 22   | 22 |    |
| 21. <i>S. minus</i> SKS1073    | 1.40 | 1.40 | 1.27 | 1.40 | 1.40 | 1.40 | 1.40 | 1.40 | 1.40 | 2.28 | 0.06 | 0.00 | 0.00 | 0.00 | 0.00 | 0.00 | 0.00 | 0.00 | 0.00 | 0.00 |      | 0    | 0    | 0    | 0    | 25   | 25   | 31   | 25   | 21   | 21   | 25   | 21   | 21   | 22   | 22   | 22 |    |
| 22. <i>S. minus</i> SKS1018    | 1.40 | 1.40 | 1.27 | 1.40 | 1.40 | 1.40 | 1.40 | 1.40 | 1.40 | 2.28 | 0.06 | 0.00 | 0.00 | 0.00 | 0.00 | 0.00 | 0.00 | 0.00 | 0.00 | 0.00 | 0.00 |      | 0    | 0    | 0    | 25   | 25   | 31   | 25   | 21   | 21   | 25   | 21   | 21   | 22   | 22   | 22 |    |
| 23. <i>S. minus</i> SKS743     | 1.40 | 1.40 | 1.27 | 1.40 | 1.40 | 1.40 | 1.40 | 1.40 | 1.40 | 2.28 | 0.06 | 0.00 | 0.00 | 0.00 | 0.00 | 0.00 | 0.00 | 0.00 | 0.00 | 0.00 | 0.00 | 0.00 |      | 0    | 25   | 25   | 31   | 25   | 21   | 21   | 25   | 21   | 21   | 22   | 22   | 22   |    |    |
| 24. <i>S. minus</i> SKS161     | 1.40 | 1.40 | 1.27 | 1.40 | 1.40 | 1.40 | 1.40 | 1.40 | 1.40 | 2.28 | 0.06 | 0.00 | 0.00 | 0.00 | 0.00 | 0.00 | 0.00 | 0.00 | 0.00 | 0.00 | 0.00 | 0.00 | 0.00 |      | 25   | 25   | 31   | 25   | 21   | 21   | 25   | 21   | 21   | 22   | 22   | 22   |    |    |
| 25. <i>S. subtilis</i> SKS937  | 2.09 | 2.09 | 1.97 | 2.09 | 2.09 | 2.09 | 2.09 | 2.09 | 2.09 | 3.30 | 1.52 | 1.59 | 1.59 | 1.59 | 1.59 | 1.59 | 1.59 | 1.59 | 1.59 | 1.59 | 1.59 | 1.59 | 1.59 | 1.59 |      | 0    | 45   | 38   | 38   | 38   | 38   | 38   | 38   | 38   | 35   | 35   | 35 |    |
| 26. <i>S. subtilis</i> SKS1056 | 2.09 | 2.09 | 1.97 | 2.09 | 2.09 | 2.09 | 2.09 | 2.09 | 2.09 | 3.30 | 1.52 | 1.59 | 1.59 | 1.59 | 1.59 | 1.59 | 1.59 | 1.59 | 1.59 | 1.59 | 1.59 | 1.59 | 1.59 | 1.59 | 0.00 |      | 45   | 38   | 38   | 38   | 38   | 38   | 38   | 38   | 35   | 35   | 35 |    |
| 27. <i>S. teres</i> SKS1045    | 2.54 | 2.54 | 2.54 | 2.54 | 2.54 | 2.54 | 2.54 | 2.54 | 2.54 | 1.52 | 2.03 | 1.97 | 1.97 | 1.97 | 1.97 | 1.97 | 1.97 | 1.97 | 1.97 | 1.97 | 1.97 | 1.97 | 1.97 | 1.97 | 2.85 | 2.85 |      | 11   | 12   | 12   | 11   | 12   | 12   | 21   | 21   | 21   |    |    |
| 28. <i>S. teres</i> SKS026     | 2.54 | 2.54 | 2.41 | 2.54 | 2.54 | 2.54 | 2.54 | 2.54 | 2.54 | 1.78 | 1.65 | 1.59 | 1.59 | 1.59 | 1.59 | 1.59 | 1.59 | 1.59 | 1.59 | 1.59 | 1.59 | 1.59 | 1.59 | 1.59 | 2.41 | 2.41 | 0.70 |      | 4    | 4    | 0    | 4    | 4    | 13   | 13   | 13   |    |    |
| 29. <i>S. teres</i> SKS187     | 2.41 | 2.41 | 2.28 | 2.41 | 2.41 | 2.41 | 2.41 | 2.41 | 2.41 | 1.65 | 1.40 | 1.33 | 1.33 | 1.33 | 1.33 | 1.33 | 1.33 | 1.33 | 1.33 | 1.33 | 1.33 | 1.33 | 1.33 | 1.33 | 2.41 | 2.41 | 0.76 | 0.25 |      | 0    | 4    | 0    | 0    | 11   | 11   | 11   |    |    |
| 30. <i>S. teres</i> SKS085     | 2.41 | 2.41 | 2.28 | 2.41 | 2.41 | 2.41 | 2.41 | 2.41 | 2.41 | 1.65 | 1.40 | 1.33 | 1.33 | 1.33 | 1.33 | 1.33 | 1.33 | 1.33 | 1.33 | 1.33 | 1.33 | 1.33 | 1.33 | 1.33 | 2.41 | 2.41 | 0.76 | 0.25 | 0.00 |      | 4    | 0    | 0    | 11   | 11   | 11   |    |    |
| 31. <i>S. teres</i> SKS351     | 2.54 | 2.54 | 2.41 | 2.54 | 2.54 | 2.54 | 2.54 | 2.54 | 2.54 | 1.78 | 1.65 | 1.59 | 1.59 | 1.59 | 1.59 | 1.59 | 1.59 | 1.59 | 1.59 | 1.59 | 1.59 | 1.59 | 1.59 | 1.59 | 2.41 | 2.41 | 0.70 | 0.00 | 0.25 | 0.25 |      | 4    | 4    | 13   | 13   | 13   |    |    |
| 32. <i>S. teres</i> SKS107     | 2.41 | 2.41 | 2.28 | 2.41 | 2.41 | 2.41 | 2.41 | 2.41 | 2.41 | 1.65 | 1.40 | 1.33 | 1.33 | 1.33 | 1.33 | 1.33 | 1.33 | 1.33 | 1.33 | 1.33 | 1.33 | 1.33 | 1.33 | 1.33 | 2.41 | 2.41 | 0.76 | 0.25 | 0.00 | 0.00 | 0.25 |      | 0    | 11   | 11   | 11   |    |    |
| 33. <i>S. teres</i> SKS988     | 2.41 | 2.41 | 2.28 | 2.41 | 2.41 | 2.41 | 2.41 | 2.41 | 2.41 | 1.65 | 1.40 | 1.33 | 1.33 | 1.33 | 1.33 | 1.33 | 1.33 | 1.33 | 1.33 | 1.33 | 1.33 | 1.33 | 1.33 | 1.33 | 2.41 | 2.41 | 0.76 | 0.25 | 0.00 | 0.00 | 0.25 | 0.00 |      | 11   | 11   | 11   |    |    |
| 34. <i>S. yagiui</i> SKS977    | 2.28 | 2.28 | 2.16 | 2.28 | 2.28 | 2.28 | 2.28 | 2.28 | 2.28 | 1.78 | 1.46 | 1.40 | 1.40 | 1.40 | 1.40 | 1.40 | 1.40 | 1.40 | 1.40 | 1.40 | 1.40 | 1.40 | 1.40 | 1.40 | 2.22 | 2.22 | 1.33 | 0.82 | 0.70 | 0.70 | 0.82 | 0.70 | 0.70 |      | 0    | 0    | 0  |    |
| 35. <i>S. yagiui</i> SKS787    | 2.28 | 2.28 | 2.16 | 2.28 | 2.28 | 2.28 | 2.28 | 2.28 | 2.28 | 1.78 | 1.46 | 1.40 | 1.40 | 1.40 | 1.40 | 1.40 | 1.40 | 1.40 | 1.40 | 1.40 | 1.40 | 1.40 | 1.40 | 1.40 | 2.22 | 2.22 | 1.33 | 0.82 | 0.70 | 0.70 | 0.82 | 0.70 | 0.70 | 0.00 |      | 0    | 0  |    |
| 36. <i>S. yagiui</i> SKS164    | 2.28 | 2.28 | 2.16 | 2.28 | 2.28 | 2.28 | 2.28 | 2.28 | 2.28 | 1.78 | 1.46 | 1.40 | 1.40 | 1.40 | 1.40 | 1.40 | 1.40 | 1.40 | 1.40 | 1.40 | 1.40 | 1.40 | 1.40 | 1.40 | 2.22 | 2.22 | 1.33 | 0.82 | 0.70 | 0.70 | 0.82 | 0.70 | 0.70 | 0.00 | 0.00 |      | 0  |    |
| 37. <i>S. yagiui</i> SKS071    | 2.28 | 2.28 | 2.16 | 2.28 | 2.28 | 2.28 | 2.28 | 2.28 | 2.28 | 1.78 | 1.46 | 1.40 | 1.40 | 1.40 | 1.40 | 1.40 | 1.40 | 1.40 | 1.40 | 1.40 | 1.40 | 1.40 | 1.40 | 1.40 | 2.22 | 2.22 | 1.33 | 0.82 | 0.70 | 0.70 | 0.82 | 0.70 | 0.70 | 0.00 | 0.00 | 0.00 |    |    |

Supplementary Table S7. Numbers of nucleotide differences (above diagonal) and pairwise distances (% , below diagonal) of the ITS regions among 37 *Spirostomum* populations.

| Taxon                          | 1     | 2     | 3     | 4     | 5     | 6     | 7     | 8     | 9     | 10    | 11    | 12    | 13    | 14    | 15    | 16    | 17    | 18    | 19    | 20    | 21    | 22    | 23    | 24    | 25    | 26    | 27    | 28   | 29   | 30   | 31   | 32   | 33   | 34   | 35   | 36   | 37   |    |   |
|--------------------------------|-------|-------|-------|-------|-------|-------|-------|-------|-------|-------|-------|-------|-------|-------|-------|-------|-------|-------|-------|-------|-------|-------|-------|-------|-------|-------|-------|------|------|------|------|------|------|------|------|------|------|----|---|
| 1. <i>S. ambiguum</i> SKS167   |       | 0     | 0     | 0     | 0     | 0     | 0     | 0     | 0     | 25    | 11    | 11    | 11    | 11    | 11    | 11    | 11    | 11    | 11    | 11    | 12    | 9     | 10    | 10    | 3     | 3     | 19    | 21   | 19   | 23   | 21   | 21   | 21   | 29   | 29   | 29   | 29   |    |   |
| 2. <i>S. ambiguum</i> SKS184   | 0.00  |       | 0     | 0     | 0     | 0     | 0     | 0     | 0     | 25    | 11    | 11    | 11    | 11    | 11    | 11    | 11    | 11    | 11    | 12    | 9     | 10    | 10    | 3     | 3     | 19    | 21    | 19   | 23   | 21   | 21   | 21   | 29   | 29   | 29   | 29   |      |    |   |
| 3. <i>S. ambiguum</i> SKS185   | 0.00  | 0.00  |       | 0     | 0     | 0     | 0     | 0     | 0     | 25    | 11    | 11    | 11    | 11    | 11    | 11    | 11    | 11    | 11    | 12    | 9     | 10    | 10    | 3     | 3     | 19    | 21    | 19   | 23   | 21   | 21   | 21   | 29   | 29   | 29   | 29   |      |    |   |
| 4. <i>S. ambiguum</i> SKS949   | 0.00  | 0.00  | 0.00  |       | 0     | 0     | 0     | 0     | 0     | 25    | 11    | 11    | 11    | 11    | 11    | 11    | 11    | 11    | 11    | 12    | 9     | 10    | 10    | 3     | 3     | 19    | 21    | 19   | 23   | 21   | 21   | 21   | 29   | 29   | 29   | 29   |      |    |   |
| 5. <i>S. ambiguum</i> SKS989   | 0.00  | 0.00  | 0.00  | 0.00  |       | 0     | 0     | 0     | 0     | 25    | 11    | 11    | 11    | 11    | 11    | 11    | 11    | 11    | 11    | 12    | 9     | 10    | 10    | 3     | 3     | 19    | 21    | 19   | 23   | 21   | 21   | 21   | 29   | 29   | 29   | 29   |      |    |   |
| 6. <i>S. ambiguum</i> SKS363   | 0.00  | 0.00  | 0.00  | 0.00  | 0.00  |       | 0     | 0     | 0     | 25    | 11    | 11    | 11    | 11    | 11    | 11    | 11    | 11    | 11    | 12    | 9     | 10    | 10    | 3     | 3     | 19    | 21    | 19   | 23   | 21   | 21   | 21   | 29   | 29   | 29   | 29   |      |    |   |
| 7. <i>S. ambiguum</i> SKS947   | 0.00  | 0.00  | 0.00  | 0.00  | 0.00  | 0.00  |       | 0     | 0     | 25    | 11    | 11    | 11    | 11    | 11    | 11    | 11    | 11    | 11    | 12    | 9     | 10    | 10    | 3     | 3     | 19    | 21    | 19   | 23   | 21   | 21   | 21   | 29   | 29   | 29   | 29   |      |    |   |
| 8. <i>S. ambiguum</i> SKS779   | 0.00  | 0.00  | 0.00  | 0.00  | 0.00  | 0.00  | 0.00  |       | 0     | 25    | 11    | 11    | 11    | 11    | 11    | 11    | 11    | 11    | 11    | 12    | 9     | 10    | 10    | 3     | 3     | 19    | 21    | 19   | 23   | 21   | 21   | 21   | 29   | 29   | 29   | 29   |      |    |   |
| 9. <i>S. ambiguum</i> SKS254   | 0.00  | 0.00  | 0.00  | 0.00  | 0.00  | 0.00  | 0.00  | 0.00  |       | 25    | 11    | 11    | 11    | 11    | 11    | 11    | 11    | 11    | 11    | 12    | 9     | 10    | 10    | 3     | 3     | 19    | 21    | 19   | 23   | 21   | 21   | 21   | 29   | 29   | 29   | 29   |      |    |   |
| 10. <i>S. caudatum</i> SKS302  | 10.68 | 10.68 | 10.68 | 10.68 | 10.68 | 10.68 | 10.68 | 10.68 | 10.68 |       | 31    | 31    | 31    | 31    | 31    | 31    | 31    | 31    | 31    | 31    | 30    | 29    | 30    | 30    | 25    | 25    | 19    | 20   | 19   | 19   | 20   | 20   | 20   | 24   | 24   | 24   | 24   |    |   |
| 11. <i>S. minus</i> SKS161     | 4.70  | 4.70  | 4.70  | 4.70  | 4.70  | 4.70  | 4.70  | 4.70  | 4.70  | 13.25 |       | 0     | 0     | 0     | 0     | 0     | 0     | 0     | 0     | 0     | 1     | 2     | 1     | 1     | 12    | 12    | 25    | 27   | 25   | 27   | 27   | 27   | 27   | 32   | 32   | 32   | 32   |    |   |
| 12. <i>S. minus</i> SKS182     | 4.70  | 4.70  | 4.70  | 4.70  | 4.70  | 4.70  | 4.70  | 4.70  | 4.70  | 13.25 | 0.00  |       | 0     | 0     | 0     | 0     | 0     | 0     | 0     | 0     | 1     | 2     | 1     | 1     | 12    | 12    | 25    | 27   | 25   | 27   | 27   | 27   | 27   | 27   | 32   | 32   | 32   | 32 |   |
| 13. <i>S. minus</i> SKS214     | 4.70  | 4.70  | 4.70  | 4.70  | 4.70  | 4.70  | 4.70  | 4.70  | 4.70  | 13.25 | 0.00  | 0.00  |       | 0     | 0     | 0     | 0     | 0     | 0     | 1     | 2     | 1     | 1     | 12    | 12    | 25    | 27    | 25   | 27   | 27   | 27   | 27   | 27   | 32   | 32   | 32   | 32   |    |   |
| 14. <i>S. minus</i> SKS215     | 4.70  | 4.70  | 4.70  | 4.70  | 4.70  | 4.70  | 4.70  | 4.70  | 4.70  | 13.25 | 0.00  | 0.00  | 0.00  |       | 0     | 0     | 0     | 0     | 0     | 1     | 2     | 1     | 1     | 12    | 12    | 25    | 27    | 25   | 27   | 27   | 27   | 27   | 27   | 32   | 32   | 32   | 32   |    |   |
| 15. <i>S. minus</i> SKS386     | 4.70  | 4.70  | 4.70  | 4.70  | 4.70  | 4.70  | 4.70  | 4.70  | 4.70  | 13.25 | 0.00  | 0.00  | 0.00  | 0.00  |       | 0     | 0     | 0     | 0     | 1     | 2     | 1     | 1     | 12    | 12    | 25    | 27    | 25   | 27   | 27   | 27   | 27   | 27   | 32   | 32   | 32   | 32   |    |   |
| 16. <i>S. minus</i> SKS743     | 4.70  | 4.70  | 4.70  | 4.70  | 4.70  | 4.70  | 4.70  | 4.70  | 4.70  | 13.25 | 0.00  | 0.00  | 0.00  | 0.00  | 0.00  |       | 0     | 0     | 0     | 1     | 2     | 1     | 1     | 12    | 12    | 25    | 27    | 25   | 27   | 27   | 27   | 27   | 27   | 32   | 32   | 32   | 32   |    |   |
| 17. <i>S. minus</i> SKS840     | 4.70  | 4.70  | 4.70  | 4.70  | 4.70  | 4.70  | 4.70  | 4.70  | 4.70  | 13.25 | 0.00  | 0.00  | 0.00  | 0.00  | 0.00  | 0.00  |       | 0     | 0     | 1     | 2     | 1     | 1     | 12    | 12    | 25    | 27    | 25   | 27   | 27   | 27   | 27   | 27   | 32   | 32   | 32   | 32   |    |   |
| 18. <i>S. minus</i> SKS1018    | 4.70  | 4.70  | 4.70  | 4.70  | 4.70  | 4.70  | 4.70  | 4.70  | 4.70  | 13.25 | 0.00  | 0.00  | 0.00  | 0.00  | 0.00  | 0.00  | 0.00  |       | 0     | 1     | 2     | 1     | 1     | 12    | 12    | 25    | 27    | 25   | 27   | 27   | 27   | 27   | 27   | 32   | 32   | 32   | 32   |    |   |
| 19. <i>S. minus</i> SKS1044    | 4.70  | 4.70  | 4.70  | 4.70  | 4.70  | 4.70  | 4.70  | 4.70  | 4.70  | 13.25 | 0.00  | 0.00  | 0.00  | 0.00  | 0.00  | 0.00  | 0.00  | 0.00  |       | 0     | 1     | 2     | 1     | 1     | 12    | 12    | 25    | 27   | 25   | 27   | 27   | 27   | 27   | 27   | 32   | 32   | 32   | 32 |   |
| 20. <i>S. minus</i> SKS1073    | 4.70  | 4.70  | 4.70  | 4.70  | 4.70  | 4.70  | 4.70  | 4.70  | 4.70  | 13.25 | 0.00  | 0.00  | 0.00  | 0.00  | 0.00  | 0.00  | 0.00  | 0.00  | 0.00  |       | 1     | 2     | 1     | 1     | 12    | 12    | 25    | 27   | 25   | 27   | 27   | 27   | 27   | 27   | 32   | 32   | 32   | 32 |   |
| 21. <i>S. minus</i> SKS731     | 5.13  | 5.13  | 5.13  | 5.13  | 5.13  | 5.13  | 5.13  | 5.13  | 5.13  | 12.82 | 0.43  | 0.43  | 0.43  | 0.43  | 0.43  | 0.43  | 0.43  | 0.43  | 0.43  | 0.43  |       | 3     | 2     | 2     | 13    | 13    | 25    | 27   | 25   | 26   | 27   | 27   | 27   | 31   | 31   | 31   | 31   |    |   |
| 22. <i>S. minus</i> GuS1058    | 3.85  | 3.85  | 3.85  | 3.85  | 3.85  | 3.85  | 3.85  | 3.85  | 3.85  | 12.39 | 0.85  | 0.85  | 0.85  | 0.85  | 0.85  | 0.85  | 0.85  | 0.85  | 0.85  | 0.85  | 1.28  |       | 1     | 1     | 10    | 10    | 23    | 25   | 23   | 26   | 25   | 25   | 25   | 25   | 30   | 30   | 30   | 30 |   |
| 23. <i>S. minus</i> SKS794     | 4.27  | 4.27  | 4.27  | 4.27  | 4.27  | 4.27  | 4.27  | 4.27  | 4.27  | 12.82 | 0.43  | 0.43  | 0.43  | 0.43  | 0.43  | 0.43  | 0.43  | 0.43  | 0.43  | 0.43  | 0.85  | 0.43  |       | 0     | 11    | 11    | 24    | 26   | 24   | 26   | 26   | 26   | 26   | 26   | 31   | 31   | 31   | 31 |   |
| 24. <i>S. minus</i> SKS939     | 4.27  | 4.27  | 4.27  | 4.27  | 4.27  | 4.27  | 4.27  | 4.27  | 4.27  | 12.82 | 0.43  | 0.43  | 0.43  | 0.43  | 0.43  | 0.43  | 0.43  | 0.43  | 0.43  | 0.43  | 0.85  | 0.43  | 0.00  |       | 11    | 11    | 24    | 26   | 24   | 26   | 26   | 26   | 26   | 31   | 31   | 31   | 31   |    |   |
| 25. <i>S. subtilis</i> SKS937  | 1.28  | 1.28  | 1.28  | 1.28  | 1.28  | 1.28  | 1.28  | 1.28  | 1.28  | 10.68 | 5.13  | 5.13  | 5.13  | 5.13  | 5.13  | 5.13  | 5.13  | 5.13  | 5.13  | 5.13  | 5.56  | 4.27  | 4.70  |       | 0     | 19    | 21    | 19   | 23   | 21   | 21   | 21   | 29   | 29   | 29   | 29   |      |    |   |
| 26. <i>S. subtilis</i> SKS1056 | 1.28  | 1.28  | 1.28  | 1.28  | 1.28  | 1.28  | 1.28  | 1.28  | 1.28  | 10.68 | 5.13  | 5.13  | 5.13  | 5.13  | 5.13  | 5.13  | 5.13  | 5.13  | 5.13  | 5.13  | 5.56  | 4.27  | 4.70  | 4.70  | 0.00  |       | 19    | 21   | 19   | 23   | 21   | 21   | 21   | 29   | 29   | 29   | 29   |    |   |
| 27. <i>S. teres</i> SKS351     | 8.12  | 8.12  | 8.12  | 8.12  | 8.12  | 8.12  | 8.12  | 8.12  | 8.12  | 10.68 | 10.68 | 10.68 | 10.68 | 10.68 | 10.68 | 10.68 | 10.68 | 10.68 | 10.68 | 10.68 | 10.68 | 9.83  | 10.26 | 10.26 | 8.12  | 8.12  |       | 3    | 0    | 14   | 3    | 3    | 3    | 14   | 14   | 14   | 14   |    |   |
| 28. <i>S. teres</i> SKS107     | 8.97  | 8.97  | 8.97  | 8.97  | 8.97  | 8.97  | 8.97  | 8.97  | 8.97  | 8.55  | 11.54 | 11.54 | 11.54 | 11.54 | 11.54 | 11.54 | 11.54 | 11.54 | 11.54 | 11.54 | 11.54 | 10.68 | 11.11 | 11.11 | 8.97  | 8.97  | 1.28  |      | 3    | 13   | 0    | 0    | 0    | 15   | 15   | 15   | 15   |    |   |
| 29. <i>S. teres</i> SKS026     | 8.12  | 8.12  | 8.12  | 8.12  | 8.12  | 8.12  | 8.12  | 8.12  | 8.12  | 10.68 | 10.68 | 10.68 | 10.68 | 10.68 | 10.68 | 10.68 | 10.68 | 10.68 | 10.68 | 10.68 | 10.68 | 9.83  | 10.26 | 10.26 | 8.12  | 8.12  | 0.00  | 1.28 |      | 14   | 3    | 3    | 3    | 14   | 14   | 14   | 14   |    |   |
| 30. <i>S. teres</i> SKS1045    | 9.83  | 9.83  | 9.83  | 9.83  | 9.83  | 9.83  | 9.83  | 9.83  | 9.83  | 8.12  | 11.54 | 11.54 | 11.54 | 11.54 | 11.54 | 11.54 | 11.54 | 11.54 | 11.54 | 11.54 | 11.11 | 11.11 | 11.11 | 9.83  | 9.83  | 5.98  | 5.56  | 5.98 |      | 13   | 13   | 13   | 15   | 15   | 15   | 15   |      |    |   |
| 31. <i>S. teres</i> SKS187     | 8.97  | 8.97  | 8.97  | 8.97  | 8.97  | 8.97  | 8.97  | 8.97  | 8.97  | 8.55  | 11.54 | 11.54 | 11.54 | 11.54 | 11.54 | 11.54 | 11.54 | 11.54 | 11.54 | 11.54 | 11.54 | 11.54 | 11.54 | 10.68 | 11.11 | 11.11 | 8.97  | 8.97 | 1.28 | 0.00 | 1.28 | 5.56 |      | 0    | 15   | 15   | 15   | 15 |   |
| 32. <i>S. teres</i> SKS085     | 8.97  | 8.97  | 8.97  | 8.97  | 8.97  | 8.97  | 8.97  | 8.97  | 8.97  | 8.55  | 11.54 | 11.54 | 11.54 | 11.54 | 11.54 | 11.54 | 11.54 | 11.54 | 11.54 | 11.54 | 11.54 | 11.54 | 10.68 | 11.11 | 11.11 | 8.97  | 8.97  | 1.28 | 0.00 | 1.28 | 5.56 | 0.00 |      | 0    | 15   | 15   | 15   | 15 |   |
| 33. <i>S. teres</i> SKS988     | 8.97  | 8.97  | 8.97  | 8.97  | 8.97  | 8.97  | 8.97  | 8.97  | 8.97  | 8.55  | 11.54 | 11.54 | 11.54 | 11.54 | 11.54 | 11.54 | 11.54 | 11.54 | 11.54 | 11.54 | 11.54 | 10.68 | 11.11 | 11.11 | 8.97  | 8.97  | 1.28  | 0.00 | 1.28 | 5.56 | 0.00 | 0.00 |      | 0    | 15   | 15   | 15   | 15 |   |
| 34. <i>S. yagiui</i> SKS071    | 12.39 | 12.39 | 12.39 | 12.39 | 12.39 | 12.39 | 12.39 | 12.39 | 12.39 | 10.26 | 13.68 | 13.68 | 13.68 | 13.68 | 13.68 | 13.68 | 13.68 | 13.68 | 13.68 | 13.68 | 13.68 | 13.25 | 12.82 | 13.25 | 13.25 | 12.39 | 12.39 | 5.98 | 6.41 | 5.98 | 6.41 | 6.41 | 6.41 | 6.41 | 6.41 | 0    | 0    | 0  |   |
| 35. <i>S. yagiui</i> SKS164    | 12.39 | 12.39 | 12.39 | 12.39 | 12.39 | 12.39 | 12.39 | 12.39 | 12.39 | 10.26 | 13.68 | 13.68 | 13.68 | 13.68 | 13.68 | 13.68 | 13.68 | 13.68 | 13.68 | 13.68 | 13.68 | 13.25 | 12.82 | 13.25 | 13.25 | 12.39 | 12.39 | 5.98 | 6.41 | 5.98 | 6.41 | 6.41 | 6.41 | 6.41 | 6.41 | 0.00 |      | 0  | 0 |
| 36. <i>S. yagiui</i> SKS787    | 12.39 | 12.39 | 12.39 | 12.39 | 12.39 | 12.39 | 12.39 | 12.39 | 12.39 | 10.26 | 13.68 | 13.68 | 13.68 | 13.68 | 13.68 | 13.68 | 13.68 | 13.68 | 13.68 | 13.68 | 13.68 | 13.25 | 12.82 | 13.25 | 13.25 | 12.39 | 12.39 | 5.98 | 6.41 | 5.98 | 6.41 | 6.41 | 6.41 | 6.41 | 6.41 | 0.00 | 0.00 |    | 0 |
| 37. <i>S. yagiui</i> SKS977    | 12.39 | 12.39 | 12.39 | 12.39 | 12.39 | 12.39 | 12.39 | 12.39 | 12.39 | 10.26 | 13.68 | 13.68 | 13.68 | 13.68 | 13.68 | 13.68 | 13.68 | 13.68 | 13.68 | 13.68 | 13.68 | 13.25 | 12.82 | 13.25 | 13.25 | 12.39 | 12.39 | 5.98 | 6.41 | 5.98 | 6.41 | 6.41 | 6.41 | 6.41 | 6.41 | 0.00 | 0.00 |    |   |

Supplementary Table S8. Numbers of nucleotide differences (above diagonal) and pairwise distances (% , below diagonal) of the D1D2 domain of the 28S rRNA gene sequences among 37 *Spirostomum* populations.

| Taxon                          | 1    | 2    | 3    | 4    | 5    | 6    | 7    | 8    | 9    | 10   | 11   | 12   | 13   | 14   | 15   | 16   | 17   | 18   | 19   | 20   | 21   | 22   | 23   | 24   | 25   | 26   | 27   | 28   | 29   | 30   | 31   | 32   | 33   | 34   | 35   | 36   | 37 |    |
|--------------------------------|------|------|------|------|------|------|------|------|------|------|------|------|------|------|------|------|------|------|------|------|------|------|------|------|------|------|------|------|------|------|------|------|------|------|------|------|----|----|
| 1. <i>S. ambiguum</i> SKS185   |      | 0    | 0    | 0    | 2    | 2    | 1    | 0    | 0    | 39   | 18   | 18   | 18   | 18   | 18   | 18   | 18   | 18   | 18   | 18   | 18   | 18   | 18   | 18   | 22   | 22   | 45   | 45   | 43   | 43   | 43   | 43   | 43   | 44   | 39   | 39   | 39 | 39 |
| 2. <i>S. ambiguum</i> SKS184   | 0.00 |      | 0    | 0    | 2    | 2    | 1    | 0    | 0    | 39   | 18   | 18   | 18   | 18   | 18   | 18   | 18   | 18   | 18   | 18   | 18   | 18   | 18   | 18   | 22   | 22   | 45   | 45   | 43   | 43   | 43   | 43   | 44   | 39   | 39   | 39   | 39 |    |
| 3. <i>S. ambiguum</i> SKS947   | 0.00 | 0.00 |      | 0    | 2    | 2    | 1    | 0    | 0    | 39   | 18   | 18   | 18   | 18   | 18   | 18   | 18   | 18   | 18   | 18   | 18   | 18   | 18   | 18   | 22   | 22   | 45   | 45   | 43   | 43   | 43   | 43   | 44   | 39   | 39   | 39   | 39 |    |
| 4. <i>S. ambiguum</i> SKS989   | 0.00 | 0.00 | 0.00 |      | 2    | 2    | 1    | 0    | 0    | 39   | 18   | 18   | 18   | 18   | 18   | 18   | 18   | 18   | 18   | 18   | 18   | 18   | 18   | 18   | 22   | 22   | 45   | 45   | 43   | 43   | 43   | 43   | 44   | 39   | 39   | 39   | 39 |    |
| 5. <i>S. ambiguum</i> SKS167   | 0.42 | 0.42 | 0.42 | 0.42 |      | 0    | 1    | 2    | 2    | 39   | 16   | 16   | 16   | 16   | 16   | 16   | 16   | 16   | 16   | 16   | 16   | 16   | 16   | 16   | 20   | 20   | 45   | 45   | 43   | 43   | 43   | 43   | 44   | 39   | 39   | 39   | 39 |    |
| 6. <i>S. ambiguum</i> SKS254   | 0.42 | 0.42 | 0.42 | 0.42 | 0.00 |      | 1    | 2    | 2    | 39   | 16   | 16   | 16   | 16   | 16   | 16   | 16   | 16   | 16   | 16   | 16   | 16   | 16   | 16   | 20   | 20   | 45   | 45   | 43   | 43   | 43   | 43   | 44   | 39   | 39   | 39   | 39 |    |
| 7. <i>S. ambiguum</i> SKS779   | 0.21 | 0.21 | 0.21 | 0.21 | 0.21 | 0.21 |      | 1    | 1    | 40   | 17   | 17   | 17   | 17   | 17   | 17   | 17   | 17   | 17   | 17   | 17   | 17   | 17   | 17   | 21   | 21   | 46   | 46   | 44   | 44   | 44   | 44   | 45   | 40   | 40   | 40   | 40 |    |
| 8. <i>S. ambiguum</i> SKS949   | 0.00 | 0.00 | 0.00 | 0.00 | 0.42 | 0.42 | 0.21 |      | 0    | 39   | 18   | 18   | 18   | 18   | 18   | 18   | 18   | 18   | 18   | 18   | 18   | 18   | 18   | 18   | 22   | 22   | 45   | 45   | 43   | 43   | 43   | 43   | 44   | 39   | 39   | 39   | 39 |    |
| 9. <i>S. ambiguum</i> SKS363   | 0.00 | 0.00 | 0.00 | 0.00 | 0.42 | 0.42 | 0.21 | 0.00 |      | 39   | 18   | 18   | 18   | 18   | 18   | 18   | 18   | 18   | 18   | 18   | 18   | 18   | 18   | 18   | 22   | 22   | 45   | 45   | 43   | 43   | 43   | 43   | 44   | 39   | 39   | 39   | 39 |    |
| 10. <i>S. caudatum</i> SKS302  | 8.21 | 8.21 | 8.21 | 8.21 | 8.21 | 8.21 | 8.42 | 8.21 | 8.21 |      | 39   | 39   | 39   | 39   | 39   | 39   | 39   | 39   | 39   | 39   | 39   | 39   | 39   | 39   | 42   | 42   | 36   | 36   | 33   | 33   | 33   | 33   | 37   | 30   | 30   | 30   | 30 |    |
| 11. <i>S. minus</i> SKS939     | 3.79 | 3.79 | 3.79 | 3.79 | 3.37 | 3.37 | 3.58 | 3.79 | 3.79 | 8.21 |      | 0    | 0    | 0    | 0    | 0    | 0    | 0    | 0    | 0    | 0    | 0    | 0    | 0    | 22   | 22   | 36   | 36   | 34   | 34   | 34   | 34   | 36   | 36   | 36   | 36   | 36 |    |
| 12. <i>S. minus</i> SKS161     | 3.79 | 3.79 | 3.79 | 3.79 | 3.37 | 3.37 | 3.58 | 3.79 | 3.79 | 8.21 | 0.00 |      | 0    | 0    | 0    | 0    | 0    | 0    | 0    | 0    | 0    | 0    | 0    | 0    | 22   | 22   | 36   | 36   | 34   | 34   | 34   | 34   | 36   | 36   | 36   | 36   | 36 |    |
| 13. <i>S. minus</i> SKS182     | 3.79 | 3.79 | 3.79 | 3.79 | 3.37 | 3.37 | 3.58 | 3.79 | 3.79 | 8.21 | 0.00 | 0.00 |      | 0    | 0    | 0    | 0    | 0    | 0    | 0    | 0    | 0    | 0    | 0    | 22   | 22   | 36   | 36   | 34   | 34   | 34   | 34   | 36   | 36   | 36   | 36   | 36 |    |
| 14. <i>S. minus</i> SKS214     | 3.79 | 3.79 | 3.79 | 3.79 | 3.37 | 3.37 | 3.58 | 3.79 | 3.79 | 8.21 | 0.00 | 0.00 | 0.00 |      | 0    | 0    | 0    | 0    | 0    | 0    | 0    | 0    | 0    | 0    | 22   | 22   | 36   | 36   | 34   | 34   | 34   | 34   | 36   | 36   | 36   | 36   | 36 |    |
| 15. <i>S. minus</i> SKS215     | 3.79 | 3.79 | 3.79 | 3.79 | 3.37 | 3.37 | 3.58 | 3.79 | 3.79 | 8.21 | 0.00 | 0.00 | 0.00 | 0.00 |      | 0    | 0    | 0    | 0    | 0    | 0    | 0    | 0    | 0    | 22   | 22   | 36   | 36   | 34   | 34   | 34   | 34   | 36   | 36   | 36   | 36   | 36 |    |
| 16. <i>S. minus</i> SKS386     | 3.79 | 3.79 | 3.79 | 3.79 | 3.37 | 3.37 | 3.58 | 3.79 | 3.79 | 8.21 | 0.00 | 0.00 | 0.00 | 0.00 | 0.00 |      | 0    | 0    | 0    | 0    | 0    | 0    | 0    | 0    | 22   | 22   | 36   | 36   | 34   | 34   | 34   | 34   | 36   | 36   | 36   | 36   | 36 |    |
| 17. <i>S. minus</i> SKS743     | 3.79 | 3.79 | 3.79 | 3.79 | 3.37 | 3.37 | 3.58 | 3.79 | 3.79 | 8.21 | 0.00 | 0.00 | 0.00 | 0.00 | 0.00 | 0.00 |      | 0    | 0    | 0    | 0    | 0    | 0    | 0    | 22   | 22   | 36   | 36   | 34   | 34   | 34   | 34   | 36   | 36   | 36   | 36   | 36 |    |
| 18. <i>S. minus</i> SKS794     | 3.79 | 3.79 | 3.79 | 3.79 | 3.37 | 3.37 | 3.58 | 3.79 | 3.79 | 8.21 | 0.00 | 0.00 | 0.00 | 0.00 | 0.00 | 0.00 | 0.00 |      | 0    | 0    | 0    | 0    | 0    | 0    | 22   | 22   | 36   | 36   | 34   | 34   | 34   | 34   | 36   | 36   | 36   | 36   | 36 |    |
| 19. <i>S. minus</i> SKS840     | 3.79 | 3.79 | 3.79 | 3.79 | 3.37 | 3.37 | 3.58 | 3.79 | 3.79 | 8.21 | 0.00 | 0.00 | 0.00 | 0.00 | 0.00 | 0.00 | 0.00 | 0.00 |      | 0    | 0    | 0    | 0    | 0    | 22   | 22   | 36   | 36   | 34   | 34   | 34   | 34   | 36   | 36   | 36   | 36   | 36 |    |
| 20. <i>S. minus</i> SKS1018    | 3.79 | 3.79 | 3.79 | 3.79 | 3.37 | 3.37 | 3.58 | 3.79 | 3.79 | 8.21 | 0.00 | 0.00 | 0.00 | 0.00 | 0.00 | 0.00 | 0.00 | 0.00 | 0.00 |      | 0    | 0    | 0    | 0    | 22   | 22   | 36   | 36   | 34   | 34   | 34   | 34   | 36   | 36   | 36   | 36   | 36 |    |
| 21. <i>S. minus</i> SKS1044    | 3.79 | 3.79 | 3.79 | 3.79 | 3.37 | 3.37 | 3.58 | 3.79 | 3.79 | 8.21 | 0.00 | 0.00 | 0.00 | 0.00 | 0.00 | 0.00 | 0.00 | 0.00 | 0.00 | 0.00 |      | 0    | 0    | 0    | 22   | 22   | 36   | 36   | 34   | 34   | 34   | 34   | 36   | 36   | 36   | 36   | 36 |    |
| 22. <i>S. minus</i> SKS731     | 3.79 | 3.79 | 3.79 | 3.79 | 3.37 | 3.37 | 3.58 | 3.79 | 3.79 | 8.21 | 0.00 | 0.00 | 0.00 | 0.00 | 0.00 | 0.00 | 0.00 | 0.00 | 0.00 | 0.00 | 0.00 |      | 0    | 0    | 22   | 22   | 36   | 36   | 34   | 34   | 34   | 34   | 36   | 36   | 36   | 36   | 36 |    |
| 23. <i>S. minus</i> GuS1058    | 3.79 | 3.79 | 3.79 | 3.79 | 3.37 | 3.37 | 3.58 | 3.79 | 3.79 | 8.21 | 0.00 | 0.00 | 0.00 | 0.00 | 0.00 | 0.00 | 0.00 | 0.00 | 0.00 | 0.00 | 0.00 | 0.00 |      | 0    | 22   | 22   | 36   | 36   | 34   | 34   | 34   | 34   | 36   | 36   | 36   | 36   | 36 |    |
| 24. <i>S. minus</i> SKS1073    | 3.79 | 3.79 | 3.79 | 3.79 | 3.37 | 3.37 | 3.58 | 3.79 | 3.79 | 8.21 | 0.00 | 0.00 | 0.00 | 0.00 | 0.00 | 0.00 | 0.00 | 0.00 | 0.00 | 0.00 | 0.00 | 0.00 | 0.00 |      | 22   | 22   | 36   | 36   | 34   | 34   | 34   | 34   | 36   | 36   | 36   | 36   | 36 |    |
| 25. <i>S. subtilis</i> SKS937  | 4.63 | 4.63 | 4.63 | 4.63 | 4.21 | 4.21 | 4.42 | 4.63 | 4.63 | 8.84 | 4.63 | 4.63 | 4.63 | 4.63 | 4.63 | 4.63 | 4.63 | 4.63 | 4.63 | 4.63 | 4.63 | 4.63 | 4.63 | 4.63 |      | 0    | 46   | 46   | 44   | 44   | 44   | 44   | 44   | 44   | 42   | 42   | 42 |    |
| 26. <i>S. subtilis</i> SKS1056 | 4.63 | 4.63 | 4.63 | 4.63 | 4.21 | 4.21 | 4.42 | 4.63 | 4.63 | 8.84 | 4.63 | 4.63 | 4.63 | 4.63 | 4.63 | 4.63 | 4.63 | 4.63 | 4.63 | 4.63 | 4.63 | 4.63 | 4.63 | 4.63 | 0.00 |      | 46   | 46   | 44   | 44   | 44   | 44   | 44   | 44   | 42   | 42   | 42 | 42 |
| 27. <i>S. teres</i> SKS026     | 9.47 | 9.47 | 9.47 | 9.47 | 9.47 | 9.47 | 9.68 | 9.47 | 9.47 | 7.58 | 7.58 | 7.58 | 7.58 | 7.58 | 7.58 | 7.58 | 7.58 | 7.58 | 7.58 | 7.58 | 7.58 | 7.58 | 7.58 | 7.58 | 9.68 | 9.68 |      | 0    | 5    | 5    | 5    | 5    | 21   | 13   | 13   | 13   | 13 |    |
| 28. <i>S. teres</i> SKS351     | 9.47 | 9.47 | 9.47 | 9.47 | 9.47 | 9.47 | 9.68 | 9.47 | 9.47 | 7.58 | 7.58 | 7.58 | 7.58 | 7.58 | 7.58 | 7.58 | 7.58 | 7.58 | 7.58 | 7.58 | 7.58 | 7.58 | 7.58 | 7.58 | 9.68 | 9.68 | 0.00 |      | 5    | 5    | 5    | 5    | 21   | 13   | 13   | 13   | 13 |    |
| 29. <i>S. teres</i> SKS085     | 9.05 | 9.05 | 9.05 | 9.05 | 9.05 | 9.05 | 9.26 | 9.05 | 9.05 | 6.95 | 7.16 | 7.16 | 7.16 | 7.16 | 7.16 | 7.16 | 7.16 | 7.16 | 7.16 | 7.16 | 7.16 | 7.16 | 7.16 | 9.26 | 9.26 | 1.05 | 1.05 |      | 0    | 0    | 0    | 21   | 16   | 16   | 16   | 16   |    |    |
| 30. <i>S. teres</i> SKS107     | 9.05 | 9.05 | 9.05 | 9.05 | 9.05 | 9.05 | 9.26 | 9.05 | 9.05 | 6.95 | 7.16 | 7.16 | 7.16 | 7.16 | 7.16 | 7.16 | 7.16 | 7.16 | 7.16 | 7.16 | 7.16 | 7.16 | 7.16 | 9.26 | 9.26 | 1.05 | 1.05 | 0.00 |      | 0    | 0    | 21   | 16   | 16   | 16   | 16   |    |    |
| 31. <i>S. teres</i> SKS187     | 9.05 | 9.05 | 9.05 | 9.05 | 9.05 | 9.05 | 9.26 | 9.05 | 9.05 | 6.95 | 7.16 | 7.16 | 7.16 | 7.16 | 7.16 | 7.16 | 7.16 | 7.16 | 7.16 | 7.16 | 7.16 | 7.16 | 7.16 | 9.26 | 9.26 | 1.05 | 1.05 | 0.00 | 0.00 |      | 0    | 21   | 16   | 16   | 16   | 16   |    |    |
| 32. <i>S. teres</i> SKS988     | 9.05 | 9.05 | 9.05 | 9.05 | 9.05 | 9.05 | 9.26 | 9.05 | 9.05 | 6.95 | 7.16 | 7.16 | 7.16 | 7.16 | 7.16 | 7.16 | 7.16 | 7.16 | 7.16 | 7.16 | 7.16 | 7.16 | 7.16 | 9.26 | 9.26 | 1.05 | 1.05 | 0.00 | 0.00 | 0.00 |      | 21   | 16   | 16   | 16   | 16   |    |    |
| 33. <i>S. teres</i> SKS1045    | 9.26 | 9.26 | 9.26 | 9.26 | 9.26 | 9.26 | 9.47 | 9.26 | 9.26 | 7.79 | 7.58 | 7.58 | 7.58 | 7.58 | 7.58 | 7.58 | 7.58 | 7.58 | 7.58 | 7.58 | 7.58 | 7.58 | 7.58 | 9.26 | 9.26 | 4.42 | 4.42 | 4.42 | 4.42 |      | 21   | 21   | 21   | 21   | 21   |      |    |    |
| 34. <i>S. yagiui</i> SKS071    | 8.21 | 8.21 | 8.21 | 8.21 | 8.21 | 8.21 | 8.42 | 8.21 | 8.21 | 6.32 | 7.58 | 7.58 | 7.58 | 7.58 | 7.58 | 7.58 | 7.58 | 7.58 | 7.58 | 7.58 | 7.58 | 7.58 | 7.58 | 7.58 | 8.84 | 8.84 | 2.74 | 2.74 | 3.37 | 3.37 | 3.37 | 3.37 | 4.42 |      | 0    | 0    | 0  |    |
| 35. <i>S. yagiui</i> SKS164    | 8.21 | 8.21 | 8.21 | 8.21 | 8.21 | 8.21 | 8.42 | 8.21 | 8.21 | 6.32 | 7.58 | 7.58 | 7.58 | 7.58 | 7.58 | 7.58 | 7.58 | 7.58 | 7.58 | 7.58 | 7.58 | 7.58 | 7.58 | 7.58 | 8.84 | 8.84 | 2.74 | 2.74 | 3.37 | 3.37 | 3.37 | 3.37 | 4.42 | 0.00 |      | 0    | 0  |    |
| 36. <i>S. yagiui</i> SKS787    | 8.21 | 8.21 | 8.21 | 8.21 | 8.21 | 8.21 | 8.42 | 8.21 | 8.21 | 6.32 | 7.58 | 7.58 | 7.58 | 7.58 | 7.58 | 7.58 | 7.58 | 7.58 | 7.58 | 7.58 | 7.58 | 7.58 | 7.58 | 7.58 | 8.84 | 8.84 | 2.74 | 2.74 | 3.37 | 3.37 | 3.37 | 3.37 | 4.42 | 0.00 | 0.00 |      | 0  |    |
| 37. <i>S. yagiui</i> SKS977    | 8.21 | 8.21 | 8.21 | 8.21 | 8.21 | 8.21 | 8.42 | 8.21 | 8.21 | 6.32 | 7.58 | 7.58 | 7.58 | 7.58 | 7.58 | 7.58 | 7.58 | 7.58 | 7.58 | 7.58 | 7.58 | 7.58 | 7.58 | 7.58 | 8.84 | 8.84 | 2.74 | 2.74 | 3.37 | 3.37 | 3.37 | 3.37 | 4.42 | 0.00 | 0.00 | 0.00 |    |    |



Supplementary Table S9. Numbers of nucleotide differences (above diagonal) and pairwise distances (%; below diagonal) of the mitochondrial CO1 gene sequences among 37 *Spirostomum* populations.

| Taxon                          | 1     | 2     | 3     | 4     | 5     | 6     | 7     | 8     | 9     | 10    | 11    | 12    | 13    | 14    | 15    | 16    | 17    | 18    | 19    | 20    | 21    | 22    | 23    | 24    | 25    | 26    | 27    | 28    | 29    | 30    | 31    | 32    | 33    | 34    | 35  | 36  | 37  |
|--------------------------------|-------|-------|-------|-------|-------|-------|-------|-------|-------|-------|-------|-------|-------|-------|-------|-------|-------|-------|-------|-------|-------|-------|-------|-------|-------|-------|-------|-------|-------|-------|-------|-------|-------|-------|-----|-----|-----|
| 1. <i>S. ambiguum</i> SKS184   |       | 0     | 114   | 7     | 102   | 114   | 7     | 7     | 38    | 139   | 166   | 165   | 165   | 164   | 164   | 164   | 165   | 165   | 163   | 164   | 164   | 165   | 164   | 164   | 124   | 123   | 137   | 137   | 147   | 125   | 125   | 125   | 125   | 120   | 129 | 130 | 132 |
| 2. <i>S. ambiguum</i> SKS185   | 0.00  |       | 114   | 7     | 102   | 114   | 7     | 7     | 38    | 139   | 166   | 165   | 165   | 164   | 164   | 164   | 165   | 165   | 163   | 164   | 164   | 165   | 164   | 164   | 124   | 123   | 137   | 137   | 147   | 125   | 125   | 125   | 125   | 120   | 129 | 130 | 132 |
| 3. <i>S. ambiguum</i> SKS254   | 20.11 | 20.11 |       | 116   | 75    | 1     | 116   | 116   | 109   | 149   | 170   | 172   | 172   | 171   | 171   | 171   | 172   | 172   | 171   | 171   | 171   | 172   | 171   | 171   | 144   | 145   | 146   | 146   | 152   | 132   | 132   | 132   | 132   | 131   | 136 | 135 | 135 |
| 4. <i>S. ambiguum</i> SKS949   | 1.23  | 1.23  | 20.46 |       | 104   | 116   | 0     | 0     | 40    | 140   | 165   | 164   | 164   | 163   | 163   | 163   | 164   | 164   | 162   | 163   | 163   | 164   | 163   | 163   | 124   | 123   | 135   | 135   | 146   | 124   | 124   | 124   | 124   | 121   | 130 | 129 | 133 |
| 5. <i>S. ambiguum</i> SKS779   | 17.99 | 17.99 | 13.23 | 18.34 |       | 75    | 104   | 104   | 98    | 140   | 163   | 160   | 160   | 159   | 159   | 159   | 160   | 160   | 159   | 159   | 159   | 160   | 159   | 159   | 133   | 133   | 141   | 141   | 141   | 130   | 130   | 130   | 130   | 124   | 134 | 131 | 137 |
| 6. <i>S. ambiguum</i> SKS167   | 20.11 | 20.11 | 0.18  | 20.46 | 13.23 |       | 116   | 116   | 109   | 149   | 170   | 172   | 172   | 171   | 171   | 171   | 172   | 172   | 171   | 171   | 171   | 172   | 171   | 171   | 144   | 145   | 145   | 145   | 152   | 132   | 132   | 132   | 132   | 131   | 136 | 135 | 135 |
| 7. <i>S. ambiguum</i> SKS947   | 1.23  | 1.23  | 20.46 | 0.00  | 18.34 | 20.46 |       | 0     | 40    | 140   | 165   | 164   | 164   | 163   | 163   | 163   | 164   | 164   | 162   | 163   | 163   | 164   | 163   | 163   | 124   | 123   | 135   | 135   | 146   | 124   | 124   | 124   | 124   | 121   | 130 | 129 | 133 |
| 8. <i>S. ambiguum</i> SKS363   | 1.23  | 1.23  | 20.46 | 0.00  | 18.34 | 20.46 | 0.00  |       | 40    | 140   | 165   | 164   | 164   | 163   | 163   | 163   | 164   | 164   | 162   | 163   | 163   | 164   | 163   | 163   | 124   | 123   | 135   | 135   | 146   | 124   | 124   | 124   | 124   | 121   | 130 | 129 | 133 |
| 9. <i>S. ambiguum</i> SKS989   | 6.70  | 6.70  | 19.22 | 7.05  | 17.28 | 19.22 | 7.05  | 7.05  |       | 138   | 167   | 166   | 166   | 165   | 165   | 165   | 166   | 166   | 164   | 165   | 165   | 166   | 165   | 165   | 123   | 123   | 143   | 143   | 146   | 126   | 126   | 126   | 126   | 123   | 135 | 135 | 136 |
| 10. <i>S. caudatum</i> SKS302  | 24.51 | 24.51 | 26.28 | 24.69 | 24.69 | 26.28 | 24.69 | 24.69 | 24.34 |       | 142   | 144   | 144   | 143   | 143   | 143   | 144   | 144   | 142   | 143   | 143   | 144   | 143   | 143   | 131   | 134   | 111   | 111   | 126   | 95    | 95    | 95    | 95    | 111   | 116 | 115 | 116 |
| 11. <i>S. minus</i> GuS1058    | 29.28 | 29.28 | 29.98 | 29.10 | 28.75 | 29.98 | 29.10 | 29.10 | 29.45 | 25.04 |       | 14    | 14    | 13    | 13    | 13    | 14    | 14    | 12    | 13    | 13    | 14    | 13    | 13    | 156   | 159   | 146   | 146   | 151   | 134   | 134   | 134   | 134   | 151   | 152 | 152 | 154 |
| 12. <i>S. minus</i> SKS161     | 29.10 | 29.10 | 30.34 | 28.92 | 28.22 | 30.34 | 28.92 | 28.92 | 29.28 | 25.40 | 2.47  |       | 0     | 1     | 1     | 1     | 0     | 0     | 2     | 1     | 1     | 0     | 1     | 1     | 153   | 156   | 139   | 139   | 147   | 128   | 128   | 128   | 128   | 146   | 148 | 146 | 149 |
| 13. <i>S. minus</i> SKS182     | 29.10 | 29.10 | 30.34 | 28.92 | 28.22 | 30.34 | 28.92 | 28.92 | 29.28 | 25.40 | 2.47  | 0.00  |       | 1     | 1     | 1     | 0     | 0     | 2     | 1     | 1     | 0     | 1     | 1     | 153   | 156   | 139   | 139   | 147   | 128   | 128   | 128   | 128   | 146   | 148 | 146 | 149 |
| 14. <i>S. minus</i> SKS214     | 28.92 | 28.92 | 30.16 | 28.75 | 28.04 | 30.16 | 28.75 | 28.75 | 29.10 | 25.22 | 2.29  | 0.18  | 0.18  |       | 0     | 0     | 1     | 1     | 1     | 0     | 0     | 1     | 0     | 0     | 152   | 155   | 138   | 138   | 146   | 127   | 127   | 127   | 127   | 145   | 147 | 145 | 148 |
| 15. <i>S. minus</i> SKS215     | 28.92 | 28.92 | 30.16 | 28.75 | 28.04 | 30.16 | 28.75 | 28.75 | 29.10 | 25.22 | 2.29  | 0.18  | 0.18  | 0.00  |       | 0     | 1     | 1     | 1     | 0     | 0     | 1     | 0     | 0     | 152   | 155   | 138   | 138   | 146   | 127   | 127   | 127   | 127   | 145   | 147 | 145 | 148 |
| 16. <i>S. minus</i> SKS386     | 28.92 | 28.92 | 30.16 | 28.75 | 28.04 | 30.16 | 28.75 | 28.75 | 29.10 | 25.22 | 2.29  | 0.18  | 0.18  | 0.00  | 0.00  |       | 1     | 1     | 1     | 0     | 0     | 1     | 0     | 0     | 152   | 155   | 138   | 138   | 146   | 127   | 127   | 127   | 127   | 145   | 147 | 145 | 148 |
| 17. <i>S. minus</i> SKS731     | 29.10 | 29.10 | 30.34 | 28.92 | 28.22 | 30.34 | 28.92 | 28.92 | 29.28 | 25.40 | 2.47  | 0.00  | 0.00  | 0.18  | 0.18  | 0.18  |       | 0     | 2     | 1     | 1     | 0     | 1     | 1     | 153   | 156   | 139   | 139   | 147   | 128   | 128   | 128   | 128   | 146   | 148 | 146 | 149 |
| 18. <i>S. minus</i> SKS743     | 29.10 | 29.10 | 30.34 | 28.92 | 28.22 | 30.34 | 28.92 | 28.92 | 29.28 | 25.40 | 2.47  | 0.00  | 0.00  | 0.18  | 0.18  | 0.18  | 0.00  |       | 2     | 1     | 1     | 0     | 1     | 1     | 153   | 156   | 139   | 139   | 147   | 128   | 128   | 128   | 128   | 146   | 148 | 146 | 149 |
| 19. <i>S. minus</i> SKS794     | 28.75 | 28.75 | 30.16 | 28.57 | 28.04 | 30.16 | 28.57 | 28.57 | 28.92 | 25.04 | 2.12  | 0.35  | 0.35  | 0.18  | 0.18  | 0.18  | 0.35  | 0.35  |       | 1     | 1     | 2     | 1     | 1     | 151   | 154   | 138   | 138   | 147   | 126   | 126   | 126   | 126   | 145   | 146 | 144 | 147 |
| 20. <i>S. minus</i> SKS840     | 28.92 | 28.92 | 30.16 | 28.75 | 28.04 | 30.16 | 28.75 | 28.75 | 29.10 | 25.22 | 2.29  | 0.18  | 0.18  | 0.00  | 0.00  | 0.00  | 0.18  | 0.18  | 0.18  |       | 0     | 1     | 0     | 0     | 152   | 155   | 138   | 138   | 146   | 127   | 127   | 127   | 127   | 145   | 147 | 145 | 148 |
| 21. <i>S. minus</i> SKS1018    | 28.92 | 28.92 | 30.16 | 28.75 | 28.04 | 30.16 | 28.75 | 28.75 | 29.10 | 25.22 | 2.29  | 0.18  | 0.18  | 0.00  | 0.00  | 0.00  | 0.18  | 0.18  | 0.18  | 0.00  |       | 1     | 0     | 0     | 152   | 155   | 138   | 138   | 146   | 127   | 127   | 127   | 127   | 145   | 147 | 145 | 148 |
| 22. <i>S. minus</i> SKS1044    | 29.10 | 29.10 | 30.34 | 28.92 | 28.22 | 30.34 | 28.92 | 28.92 | 29.28 | 25.40 | 2.47  | 0.00  | 0.00  | 0.18  | 0.18  | 0.18  | 0.00  | 0.00  | 0.35  | 0.18  | 0.18  |       | 1     | 1     | 153   | 156   | 139   | 139   | 147   | 128   | 128   | 128   | 128   | 146   | 148 | 146 | 149 |
| 23. <i>S. minus</i> SKS1073    | 28.92 | 28.92 | 30.16 | 28.75 | 28.04 | 30.16 | 28.75 | 28.75 | 29.10 | 25.22 | 2.29  | 0.18  | 0.18  | 0.00  | 0.00  | 0.00  | 0.18  | 0.18  | 0.18  | 0.00  | 0.00  | 0.18  |       | 0     | 152   | 155   | 138   | 138   | 146   | 127   | 127   | 127   | 127   | 145   | 147 | 145 | 148 |
| 24. <i>S. minus</i> SKS939     | 28.92 | 28.92 | 30.16 | 28.75 | 28.04 | 30.16 | 28.75 | 28.75 | 29.10 | 25.22 | 2.29  | 0.18  | 0.18  | 0.00  | 0.00  | 0.00  | 0.18  | 0.18  | 0.18  | 0.00  | 0.00  | 0.18  | 0.00  |       | 152   | 155   | 138   | 138   | 146   | 127   | 127   | 127   | 127   | 145   | 147 | 145 | 148 |
| 25. <i>S. subtilis</i> SKS937  | 21.87 | 21.87 | 25.40 | 21.87 | 23.46 | 25.40 | 21.87 | 21.87 | 21.69 | 23.10 | 27.51 | 26.98 | 26.98 | 26.81 | 26.81 | 26.81 | 26.98 | 26.98 | 26.63 | 26.81 | 26.81 | 26.98 | 26.81 | 26.81 |       | 8     | 127   | 127   | 143   | 117   | 117   | 117   | 117   | 124   | 136 | 134 | 132 |
| 26. <i>S. subtilis</i> SKS1056 | 21.69 | 21.69 | 25.57 | 21.69 | 23.46 | 25.57 | 21.69 | 21.69 | 21.69 | 23.63 | 28.04 | 27.51 | 27.51 | 27.34 | 27.34 | 27.34 | 27.51 | 27.51 | 27.16 | 27.34 | 27.34 | 27.51 | 27.34 | 27.34 | 1.41  |       | 129   | 129   | 143   | 118   | 118   | 118   | 118   | 126   | 137 | 135 | 134 |
| 27. <i>S. teres</i> SKS026     | 24.16 | 24.16 | 25.75 | 23.81 | 24.87 | 25.57 | 23.81 | 23.81 | 25.22 | 19.58 | 25.75 | 24.51 | 24.51 | 24.34 | 24.34 | 24.34 | 24.51 | 24.51 | 24.34 | 24.34 | 24.34 | 24.51 | 24.34 | 24.34 | 22.40 | 22.75 |       | 0     | 118   | 77    | 77    | 77    | 77    | 106   | 115 | 115 | 111 |
| 28. <i>S. teres</i> SKS351     | 24.16 | 24.16 | 25.75 | 23.81 | 24.87 | 25.57 | 23.81 | 23.81 | 25.22 | 19.58 | 25.75 | 24.51 | 24.51 | 24.34 | 24.34 | 24.34 | 24.51 | 24.51 | 24.34 | 24.34 | 24.34 | 24.51 | 24.34 | 24.34 | 22.40 | 22.75 | 0.00  |       | 118   | 77    | 77    | 77    | 77    | 106   | 115 | 115 | 111 |
| 29. <i>S. teres</i> SKS1045    | 25.93 | 25.93 | 26.81 | 25.75 | 24.87 | 26.81 | 25.75 | 25.75 | 25.75 | 22.22 | 26.63 | 25.93 | 25.93 | 25.75 | 25.75 | 25.75 | 25.93 | 25.93 | 25.93 | 25.75 | 25.75 | 25.93 | 25.75 | 25.75 | 25.22 | 25.22 | 20.81 | 20.81 |       | 92    | 92    | 92    | 92    | 120   | 122 | 122 | 123 |
| 30. <i>S. teres</i> SKS85      | 22.05 | 22.05 | 23.28 | 21.87 | 22.93 | 23.28 | 21.87 | 21.87 | 22.22 | 16.75 | 23.63 | 22.57 | 22.57 | 22.40 | 22.40 | 22.40 | 22.57 | 22.57 | 22.22 | 22.40 | 22.40 | 22.57 | 22.40 | 22.40 | 20.63 | 20.81 | 13.58 | 13.58 | 16.23 |       | 0     | 0     | 0     | 96    | 100 | 98  | 108 |
| 31. <i>S. teres</i> SKS988     | 22.05 | 22.05 | 23.28 | 21.87 | 22.93 | 23.28 | 21.87 | 21.87 | 22.22 | 16.75 | 23.63 | 22.57 | 22.57 | 22.40 | 22.40 | 22.40 | 22.57 | 22.57 | 22.22 | 22.40 | 22.40 | 22.57 | 22.40 | 22.40 | 20.63 | 20.81 | 13.58 | 13.58 | 16.23 | 0.00  |       | 0     | 0     | 96    | 100 | 98  | 108 |
| 32. <i>S. teres</i> SKS107     | 22.05 | 22.05 | 23.28 | 21.87 | 22.93 | 23.28 | 21.87 | 21.87 | 22.22 | 16.75 | 23.63 | 22.57 | 22.57 | 22.40 | 22.40 | 22.40 | 22.57 | 22.57 | 22.22 | 22.40 | 22.40 | 22.57 | 22.40 | 22.40 | 20.63 | 20.81 | 13.58 | 13.58 | 16.23 | 0.00  | 0.00  |       | 0     | 96    | 100 | 98  | 108 |
| 33. <i>S. teres</i> SKS187     | 22.05 | 22.05 | 23.28 | 21.87 | 22.93 | 23.28 | 21.87 | 21.87 | 22.22 | 16.75 | 23.63 | 22.57 | 22.57 | 22.40 | 22.40 | 22.40 | 22.57 | 22.57 | 22.22 | 22.40 | 22.40 | 22.57 | 22.40 | 22.40 | 20.63 | 20.81 | 13.58 | 13.58 | 16.23 | 0.00  | 0.00  | 0.00  |       | 96    | 100 | 98  | 108 |
| 34. <i>S. yagiui</i> SKS787    | 21.16 | 21.16 | 23.10 | 21.34 | 21.87 | 23.10 | 21.34 | 21.34 | 21.69 | 19.58 | 26.63 | 25.75 | 25.75 | 25.57 | 25.57 | 25.57 | 25.75 | 25.75 | 25.57 | 25.57 | 25.57 | 25.75 | 25.57 | 25.57 | 21.87 | 22.22 | 18.69 | 18.69 | 21.16 | 16.93 | 16.93 | 16.93 | 16.93 |       | 72  | 70  | 70  |
| 35. <i>S. yagiui</i> SKS071    | 22.75 | 22.75 | 23.99 | 22.93 | 23.63 | 23.99 | 22.93 | 22.93 | 23.81 | 20.46 | 26.81 | 26.10 | 26.10 | 25.93 | 25.93 | 25.93 | 26.10 | 26.10 | 25.75 | 25.93 | 25.93 | 26.10 | 25.93 | 25.93 | 23.99 | 24.16 | 20.28 | 20.28 | 21.52 | 17.64 | 17.64 | 17.64 | 17.64 | 12.70 |     |     |     |



**Supplementary Table S11.** Numbers of nucleotide differences (above diagonal) and pairwise distances (% , below diagonal) of the mitochondrial CO1 (nt) gene sequences (without insert) among 37 *Spirostomum* populations.

| Taxon                          | 1     | 2     | 3     | 4     | 5     | 6     | 7     | 8     | 9     | 10    | 11    | 12    | 13    | 14    | 15    | 16    | 17    | 18    | 19    | 20    | 21    | 22    | 23    | 24    | 25    | 26    | 27    | 28    | 29    | 30    | 31    | 32    | 33    | 34   | 35 | 36 | 37 |    |    |
|--------------------------------|-------|-------|-------|-------|-------|-------|-------|-------|-------|-------|-------|-------|-------|-------|-------|-------|-------|-------|-------|-------|-------|-------|-------|-------|-------|-------|-------|-------|-------|-------|-------|-------|-------|------|----|----|----|----|----|
| 1. <i>S. ambiguum</i> SKS167   |       | 0     | 43    | 29    | 40    | 43    | 43    | 43    | 43    | 48    | 57    | 57    | 56    | 57    | 57    | 57    | 57    | 57    | 57    | 57    | 57    | 57    | 57    | 57    | 54    | 53    | 49    | 52    | 42    | 42    | 49    | 42    | 42    | 44   | 41 | 40 | 42 |    |    |
| 2. <i>S. ambiguum</i> SKS254   | 0.00  |       | 43    | 29    | 40    | 43    | 43    | 43    | 43    | 48    | 57    | 57    | 56    | 57    | 57    | 57    | 57    | 57    | 57    | 57    | 57    | 57    | 57    | 57    | 54    | 53    | 49    | 52    | 42    | 42    | 49    | 42    | 42    | 44   | 41 | 40 | 42 |    |    |
| 3. <i>S. ambiguum</i> SKS363   | 15.25 | 15.25 |       | 35    | 15    | 3     | 3     | 0     | 0     | 53    | 53    | 53    | 53    | 53    | 53    | 53    | 53    | 53    | 53    | 53    | 53    | 53    | 53    | 53    | 43    | 43    | 47    | 55    | 46    | 46    | 47    | 46    | 46    | 49   | 47 | 41 | 46 |    |    |
| 4. <i>S. ambiguum</i> SKS779   | 10.28 | 10.28 | 12.41 |       | 37    | 34    | 34    | 35    | 35    | 50    | 51    | 51    | 53    | 51    | 51    | 51    | 51    | 51    | 51    | 51    | 51    | 51    | 51    | 51    | 53    | 53    | 49    | 48    | 46    | 46    | 49    | 46    | 46    | 46   | 42 | 42 | 42 | 41 |    |
| 5. <i>S. ambiguum</i> SKS989   | 14.18 | 14.18 | 5.32  | 13.12 |       | 15    | 15    | 15    | 15    | 51    | 53    | 53    | 53    | 53    | 53    | 53    | 53    | 53    | 53    | 53    | 53    | 53    | 53    | 53    | 44    | 43    | 51    | 54    | 46    | 46    | 51    | 46    | 46    | 48   | 50 | 43 | 48 |    |    |
| 6. <i>S. ambiguum</i> SKS184   | 15.25 | 15.25 | 1.06  | 12.06 | 5.32  |       | 0     | 3     | 3     | 54    | 54    | 54    | 54    | 54    | 54    | 54    | 54    | 54    | 54    | 54    | 54    | 54    | 54    | 54    | 45    | 45    | 49    | 54    | 47    | 47    | 49    | 47    | 47    | 49   | 47 | 47 | 43 | 48 |    |
| 7. <i>S. ambiguum</i> SKS185   | 15.25 | 15.25 | 1.06  | 12.06 | 5.32  | 0.00  |       | 3     | 3     | 54    | 54    | 54    | 54    | 54    | 54    | 54    | 54    | 54    | 54    | 54    | 54    | 54    | 54    | 45    | 45    | 49    | 54    | 47    | 47    | 49    | 47    | 47    | 49    | 47   | 47 | 49 | 47 | 43 | 48 |
| 8. <i>S. ambiguum</i> SKS947   | 15.25 | 15.25 | 0.00  | 12.41 | 5.32  | 1.06  | 1.06  |       | 0     | 53    | 53    | 53    | 53    | 53    | 53    | 53    | 53    | 53    | 53    | 53    | 53    | 53    | 53    | 53    | 43    | 43    | 47    | 55    | 46    | 46    | 47    | 46    | 46    | 49   | 47 | 41 | 46 |    |    |
| 9. <i>S. ambiguum</i> SKS949   | 15.25 | 15.25 | 0.00  | 12.41 | 5.32  | 1.06  | 1.06  | 0.00  |       | 53    | 53    | 53    | 53    | 53    | 53    | 53    | 53    | 53    | 53    | 53    | 53    | 53    | 53    | 43    | 43    | 47    | 55    | 46    | 46    | 47    | 46    | 46    | 49    | 47   | 41 | 46 |    |    |    |
| 10. <i>S. caudatum</i> SKS302  | 17.02 | 17.02 | 18.79 | 17.73 | 18.09 | 19.15 | 19.15 | 18.79 | 18.79 |       | 46    | 46    | 45    | 46    | 46    | 46    | 46    | 46    | 46    | 46    | 46    | 46    | 46    | 46    | 55    | 53    | 51    | 52    | 44    | 44    | 51    | 44    | 44    | 48   | 45 | 40 | 47 |    |    |
| 11. <i>S. minus</i> SKS1018    | 20.21 | 20.21 | 18.79 | 18.09 | 18.79 | 19.15 | 19.15 | 18.79 | 18.79 | 16.31 |       | 0     | 6     | 0     | 0     | 0     | 0     | 0     | 0     | 0     | 0     | 0     | 0     | 0     | 50    | 47    | 48    | 55    | 42    | 42    | 48    | 42    | 42    | 50   | 52 | 49 | 47 |    |    |
| 12. <i>S. minus</i> SKS1044    | 20.21 | 20.21 | 18.79 | 18.09 | 18.79 | 19.15 | 19.15 | 18.79 | 18.79 | 16.31 | 0.00  |       | 6     | 0     | 0     | 0     | 0     | 0     | 0     | 0     | 0     | 0     | 0     | 0     | 50    | 47    | 48    | 55    | 42    | 42    | 48    | 42    | 42    | 50   | 52 | 49 | 47 |    |    |
| 13. <i>S. minus</i> GuS1058    | 19.86 | 19.86 | 18.79 | 18.79 | 18.79 | 19.15 | 19.15 | 18.79 | 18.79 | 15.96 | 2.13  | 2.13  |       | 6     | 6     | 6     | 6     | 6     | 6     | 6     | 6     | 6     | 6     | 6     | 53    | 50    | 52    | 57    | 46    | 46    | 52    | 46    | 46    | 52   | 55 | 52 | 51 |    |    |
| 14. <i>S. minus</i> SKS1073    | 20.21 | 20.21 | 18.79 | 18.09 | 18.79 | 19.15 | 19.15 | 18.79 | 18.79 | 16.31 | 0.00  | 0.00  | 2.13  |       | 0     | 0     | 0     | 0     | 0     | 0     | 0     | 0     | 0     | 0     | 50    | 47    | 48    | 55    | 42    | 42    | 48    | 42    | 42    | 50   | 52 | 49 | 47 |    |    |
| 15. <i>S. minus</i> SKS161     | 20.21 | 20.21 | 18.79 | 18.09 | 18.79 | 19.15 | 19.15 | 18.79 | 18.79 | 16.31 | 0.00  | 0.00  | 2.13  | 0.00  |       | 0     | 0     | 0     | 0     | 0     | 0     | 0     | 0     | 0     | 50    | 47    | 48    | 55    | 42    | 42    | 48    | 42    | 42    | 50   | 52 | 49 | 47 |    |    |
| 16. <i>S. minus</i> SKS182     | 20.21 | 20.21 | 18.79 | 18.09 | 18.79 | 19.15 | 19.15 | 18.79 | 18.79 | 16.31 | 0.00  | 0.00  | 2.13  | 0.00  | 0.00  |       | 0     | 0     | 0     | 0     | 0     | 0     | 0     | 0     | 50    | 47    | 48    | 55    | 42    | 42    | 48    | 42    | 42    | 50   | 52 | 49 | 47 |    |    |
| 17. <i>S. minus</i> SKS214     | 20.21 | 20.21 | 18.79 | 18.09 | 18.79 | 19.15 | 19.15 | 18.79 | 18.79 | 16.31 | 0.00  | 0.00  | 2.13  | 0.00  | 0.00  | 0.00  |       | 0     | 0     | 0     | 0     | 0     | 0     | 0     | 50    | 47    | 48    | 55    | 42    | 42    | 48    | 42    | 42    | 50   | 52 | 49 | 47 |    |    |
| 18. <i>S. minus</i> SKS215     | 20.21 | 20.21 | 18.79 | 18.09 | 18.79 | 19.15 | 19.15 | 18.79 | 18.79 | 16.31 | 0.00  | 0.00  | 2.13  | 0.00  | 0.00  | 0.00  | 0.00  |       | 0     | 0     | 0     | 0     | 0     | 0     | 50    | 47    | 48    | 55    | 42    | 42    | 48    | 42    | 42    | 50   | 52 | 49 | 47 |    |    |
| 19. <i>S. minus</i> SKS386     | 20.21 | 20.21 | 18.79 | 18.09 | 18.79 | 19.15 | 19.15 | 18.79 | 18.79 | 16.31 | 0.00  | 0.00  | 2.13  | 0.00  | 0.00  | 0.00  | 0.00  | 0.00  |       | 0     | 0     | 0     | 0     | 0     | 50    | 47    | 48    | 55    | 42    | 42    | 48    | 42    | 42    | 50   | 52 | 49 | 47 |    |    |
| 20. <i>S. minus</i> SKS731     | 20.21 | 20.21 | 18.79 | 18.09 | 18.79 | 19.15 | 19.15 | 18.79 | 18.79 | 16.31 | 0.00  | 0.00  | 2.13  | 0.00  | 0.00  | 0.00  | 0.00  | 0.00  | 0.00  |       | 0     | 0     | 0     | 0     | 50    | 47    | 48    | 55    | 42    | 42    | 48    | 42    | 42    | 50   | 52 | 49 | 47 |    |    |
| 21. <i>S. minus</i> SKS743     | 20.21 | 20.21 | 18.79 | 18.09 | 18.79 | 19.15 | 19.15 | 18.79 | 18.79 | 16.31 | 0.00  | 0.00  | 2.13  | 0.00  | 0.00  | 0.00  | 0.00  | 0.00  | 0.00  | 0.00  |       | 0     | 0     | 0     | 50    | 47    | 48    | 55    | 42    | 42    | 48    | 42    | 42    | 50   | 52 | 49 | 47 |    |    |
| 22. <i>S. minus</i> SKS794     | 20.21 | 20.21 | 18.79 | 18.09 | 18.79 | 19.15 | 19.15 | 18.79 | 18.79 | 16.31 | 0.00  | 0.00  | 2.13  | 0.00  | 0.00  | 0.00  | 0.00  | 0.00  | 0.00  | 0.00  | 0.00  |       | 0     | 0     | 50    | 47    | 48    | 55    | 42    | 42    | 48    | 42    | 42    | 50   | 52 | 49 | 47 |    |    |
| 23. <i>S. minus</i> SKS840     | 20.21 | 20.21 | 18.79 | 18.09 | 18.79 | 19.15 | 19.15 | 18.79 | 18.79 | 16.31 | 0.00  | 0.00  | 2.13  | 0.00  | 0.00  | 0.00  | 0.00  | 0.00  | 0.00  | 0.00  | 0.00  | 0.00  |       | 0     | 50    | 47    | 48    | 55    | 42    | 42    | 48    | 42    | 42    | 50   | 52 | 49 | 47 |    |    |
| 24. <i>S. minus</i> SKS939     | 20.21 | 20.21 | 18.79 | 18.09 | 18.79 | 19.15 | 19.15 | 18.79 | 18.79 | 16.31 | 0.00  | 0.00  | 2.13  | 0.00  | 0.00  | 0.00  | 0.00  | 0.00  | 0.00  | 0.00  | 0.00  | 0.00  | 0.00  |       | 50    | 47    | 48    | 55    | 42    | 42    | 48    | 42    | 42    | 50   | 52 | 49 | 47 |    |    |
| 25. <i>S. subtilis</i> SKS1056 | 19.15 | 19.15 | 15.25 | 18.79 | 15.60 | 15.96 | 15.96 | 15.25 | 15.25 | 19.50 | 17.73 | 17.73 | 18.79 | 17.73 | 17.73 | 17.73 | 17.73 | 17.73 | 17.73 | 17.73 | 17.73 | 17.73 | 17.73 |       | 6     | 52    | 59    | 48    | 48    | 52    | 48    | 48    | 51    | 49   | 46 | 48 |    |    |    |
| 26. <i>S. subtilis</i> SKS937  | 18.79 | 18.79 | 15.25 | 18.79 | 15.25 | 15.96 | 15.96 | 15.25 | 15.25 | 18.79 | 16.67 | 16.67 | 17.73 | 16.67 | 16.67 | 16.67 | 16.67 | 16.67 | 16.67 | 16.67 | 16.67 | 16.67 | 16.67 | 16.67 | 2.13  |       | 50    | 59    | 47    | 47    | 50    | 47    | 47    | 51   | 47 | 45 | 48 |    |    |
| 27. <i>S. teres</i> SKS026     | 17.38 | 17.38 | 16.67 | 17.38 | 18.09 | 17.38 | 17.38 | 16.67 | 16.67 | 18.09 | 17.02 | 17.02 | 18.44 | 17.02 | 17.02 | 17.02 | 17.02 | 17.02 | 17.02 | 17.02 | 17.02 | 17.02 | 17.02 | 17.02 | 18.44 | 17.73 |       | 48    | 32    | 32    | 0     | 32    | 32    | 43   | 41 | 37 | 41 |    |    |
| 28. <i>S. teres</i> SKS1045    | 18.44 | 18.44 | 19.50 | 17.02 | 19.15 | 19.15 | 19.15 | 19.50 | 19.50 | 18.44 | 19.50 | 19.50 | 20.21 | 19.50 | 19.50 | 19.50 | 19.50 | 19.50 | 19.50 | 19.50 | 19.50 | 19.50 | 19.50 | 19.50 | 20.92 | 20.92 | 17.02 |       | 36    | 36    | 48    | 36    | 36    | 45   | 40 | 42 | 44 |    |    |
| 29. <i>S. teres</i> SKS107     | 14.89 | 14.89 | 16.31 | 16.31 | 16.31 | 16.67 | 16.67 | 16.31 | 16.31 | 15.60 | 14.89 | 14.89 | 16.31 | 14.89 | 14.89 | 14.89 | 14.89 | 14.89 | 14.89 | 14.89 | 14.89 | 14.89 | 14.89 | 14.89 | 17.02 | 16.67 | 11.35 | 12.77 |       | 0     | 32    | 0     | 0     | 36   | 37 | 33 | 33 |    |    |
| 30. <i>S. teres</i> SKS187     | 14.89 | 14.89 | 16.31 | 16.31 | 16.31 | 16.67 | 16.67 | 16.31 | 16.31 | 15.60 | 14.89 | 14.89 | 16.31 | 14.89 | 14.89 | 14.89 | 14.89 | 14.89 | 14.89 | 14.89 | 14.89 | 14.89 | 14.89 | 14.89 | 17.02 | 16.67 | 11.35 | 12.77 | 0.00  |       | 32    | 0     | 0     | 36   | 37 | 33 | 33 |    |    |
| 31. <i>S. teres</i> SKS351     | 17.38 | 17.38 | 16.67 | 17.38 | 18.09 | 17.38 | 17.38 | 16.67 | 16.67 | 18.09 | 17.02 | 17.02 | 18.44 | 17.02 | 17.02 | 17.02 | 17.02 | 17.02 | 17.02 | 17.02 | 17.02 | 17.02 | 17.02 | 18.44 | 17.73 | 0.00  | 17.02 | 11.35 | 11.35 |       | 32    | 32    | 43    | 41   | 37 | 41 |    |    |    |
| 32. <i>S. teres</i> SKS85      | 14.89 | 14.89 | 16.31 | 16.31 | 16.31 | 16.67 | 16.67 | 16.31 | 16.31 | 15.60 | 14.89 | 14.89 | 16.31 | 14.89 | 14.89 | 14.89 | 14.89 | 14.89 | 14.89 | 14.89 | 14.89 | 14.89 | 14.89 | 17.02 | 16.67 | 11.35 | 12.77 | 0.00  | 0.00  | 11.35 |       | 0     | 36    | 37   | 33 | 33 |    |    |    |
| 33. <i>S. teres</i> SKS988     | 14.89 | 14.89 | 16.31 | 16.31 | 16.31 | 16.67 | 16.67 | 16.31 | 16.31 | 15.60 | 14.89 | 14.89 | 16.31 | 14.89 | 14.89 | 14.89 | 14.89 | 14.89 | 14.89 | 14.89 | 14.89 | 14.89 | 14.89 | 17.02 | 16.67 | 11.35 | 12.77 | 0.00  | 0.00  | 11.35 | 0.00  |       | 36    | 37   | 33 | 33 |    |    |    |
| 34. <i>S. yagiui</i> SKS071    | 15.60 | 15.60 | 17.38 | 14.89 | 17.02 | 17.38 | 17.38 | 17.38 | 17.38 | 17.02 | 17.73 | 17.73 | 18.44 | 17.73 | 17.73 | 17.73 | 17.73 | 17.73 | 17.73 | 17.73 | 17.73 | 17.73 | 17.73 | 18.09 | 18.09 | 15.25 | 15.96 | 12.77 | 12.77 | 15.25 | 12.77 | 12.77 |       | 16   | 27 | 4  |    |    |    |
| 35. <i>S. yagiui</i> SKS164    | 14.54 | 14.54 | 16.67 | 14.89 | 17.73 | 16.67 | 16.67 | 16.67 | 16.67 | 15.96 | 18.44 | 18.44 | 19.50 | 18.44 | 18.44 | 18.44 | 18.44 | 18.44 | 18.44 | 18.44 | 18.44 | 18.44 | 18.44 | 18.44 | 17.38 | 16.67 | 14.54 | 14.18 | 13.12 | 13.12 | 14.54 | 13.12 | 13.12 | 5.67 |    | 24 | 14 |    |    |
| 36. <i>S. yagiui</i> SKS787    | 14.18 | 14.18 | 14.54 | 14.89 | 15.25 | 15.25 | 15.25 | 14.54 | 14.54 | 14.18 | 17.38 | 17.38 | 18.44 | 17.38 | 17.38 | 17.38 | 17.38 | 17.38 | 17.38 | 17.38 | 17.38 | 17.38 | 17.38 | 16.31 | 15.96 | 13.12 | 14.89 | 11.70 | 11.70 | 13.12 | 11.70 | 11.70 | 9.57  | 8.51 |    | 25 |    |    |    |
| 37. <i>S. yagiui</i> SKS977    | 14.89 | 14.89 | 16.31 | 14.54 | 17.02 | 17.02 | 17.02 | 16.31 | 16.31 | 16.67 | 16.67 | 16.67 | 18.0  |       |       |       |       |       |       |       |       |       |       |       |       |       |       |       |       |       |       |       |       |      |    |    |    |    |    |



**Supplementary Table S13.** Numbers of nucleotide differences (above diagonal) and pairwise distances (% , below diagonal) of the 18S rRNA gene sequences among 31 *Spirostomum* populations.

| Taxon                          | 1    | 2    | 3    | 4    | 5    | 6    | 7    | 8    | 9    | 10   | 11   | 12   | 13   | 14   | 15   | 16   | 17   | 18   | 19   | 20   | 21   | 22   | 23   | 24   | 25   | 26   | 27   | 28   | 29   | 30   | 31 |
|--------------------------------|------|------|------|------|------|------|------|------|------|------|------|------|------|------|------|------|------|------|------|------|------|------|------|------|------|------|------|------|------|------|----|
| 1. <i>S. ambiguum</i> SKS167   |      | 0    | 4    | 4    | 4    | 4    | 4    | 44   | 21   | 22   | 22   | 22   | 22   | 22   | 22   | 22   | 22   | 22   | 22   | 22   | 22   | 33   | 33   | 40   | 40   | 40   | 38   | 38   | 36   | 36   | 36 |
| 2. <i>S. ambiguum</i> SKS254   | 0.00 |      | 4    | 4    | 4    | 4    | 4    | 44   | 21   | 22   | 22   | 22   | 22   | 22   | 22   | 22   | 22   | 22   | 22   | 22   | 22   | 33   | 33   | 40   | 40   | 40   | 38   | 38   | 36   | 36   | 36 |
| 3. <i>S. ambiguum</i> SKS779   | 0.25 | 0.25 |      | 2    | 2    | 2    | 2    | 44   | 19   | 20   | 20   | 20   | 20   | 20   | 20   | 20   | 20   | 20   | 20   | 20   | 20   | 31   | 31   | 40   | 38   | 38   | 36   | 36   | 34   | 34   | 34 |
| 4. <i>S. ambiguum</i> SKS185   | 0.25 | 0.25 | 0.13 |      | 0    | 0    | 0    | 42   | 21   | 22   | 22   | 22   | 22   | 22   | 22   | 22   | 22   | 22   | 22   | 22   | 22   | 33   | 33   | 40   | 40   | 40   | 38   | 38   | 36   | 36   | 36 |
| 5. <i>S. ambiguum</i> SKS989   | 0.25 | 0.25 | 0.13 | 0.00 |      | 0    | 0    | 42   | 21   | 22   | 22   | 22   | 22   | 22   | 22   | 22   | 22   | 22   | 22   | 22   | 22   | 33   | 33   | 40   | 40   | 40   | 38   | 38   | 36   | 36   | 36 |
| 6. <i>S. ambiguum</i> SKS363   | 0.25 | 0.25 | 0.13 | 0.00 | 0.00 |      | 0    | 42   | 21   | 22   | 22   | 22   | 22   | 22   | 22   | 22   | 22   | 22   | 22   | 22   | 22   | 33   | 33   | 40   | 40   | 40   | 38   | 38   | 36   | 36   | 36 |
| 7. <i>S. ambiguum</i> SKS949   | 0.25 | 0.25 | 0.13 | 0.00 | 0.00 | 0.00 |      | 42   | 21   | 22   | 22   | 22   | 22   | 22   | 22   | 22   | 22   | 22   | 22   | 22   | 22   | 33   | 33   | 40   | 40   | 40   | 38   | 38   | 36   | 36   | 36 |
| 8. <i>S. caudatum</i> SKS302   | 2.79 | 2.79 | 2.79 | 2.66 | 2.66 | 2.66 | 2.66 |      | 36   | 36   | 36   | 36   | 36   | 36   | 36   | 36   | 36   | 36   | 36   | 36   | 36   | 52   | 52   | 24   | 28   | 28   | 26   | 26   | 28   | 28   |    |
| 9. <i>S. minus</i> SKS731      | 1.33 | 1.33 | 1.20 | 1.33 | 1.33 | 1.33 | 1.33 | 2.28 |      | 1    | 1    | 1    | 1    | 1    | 1    | 1    | 1    | 1    | 1    | 1    | 1    | 24   | 24   | 32   | 26   | 26   | 22   | 22   | 23   | 23   | 23 |
| 10. <i>S. minus</i> SKS794     | 1.40 | 1.40 | 1.27 | 1.40 | 1.40 | 1.40 | 1.40 | 2.28 | 0.06 |      | 0    | 0    | 0    | 0    | 0    | 0    | 0    | 0    | 0    | 0    | 0    | 25   | 25   | 31   | 25   | 25   | 21   | 21   | 22   | 22   | 22 |
| 11. <i>S. minus</i> SKS939     | 1.40 | 1.40 | 1.27 | 1.40 | 1.40 | 1.40 | 1.40 | 2.28 | 0.06 | 0.00 |      | 0    | 0    | 0    | 0    | 0    | 0    | 0    | 0    | 0    | 0    | 25   | 25   | 31   | 25   | 25   | 21   | 21   | 22   | 22   | 22 |
| 12. <i>S. minus</i> SKS1044    | 1.40 | 1.40 | 1.27 | 1.40 | 1.40 | 1.40 | 1.40 | 2.28 | 0.06 | 0.00 | 0.00 |      | 0    | 0    | 0    | 0    | 0    | 0    | 0    | 0    | 0    | 25   | 25   | 31   | 25   | 25   | 21   | 21   | 22   | 22   | 22 |
| 13. <i>S. minus</i> GuS1058    | 1.40 | 1.40 | 1.27 | 1.40 | 1.40 | 1.40 | 1.40 | 2.28 | 0.06 | 0.00 | 0.00 | 0.00 |      | 0    | 0    | 0    | 0    | 0    | 0    | 0    | 0    | 25   | 25   | 31   | 25   | 25   | 21   | 21   | 22   | 22   | 22 |
| 14. <i>S. minus</i> SKS840     | 1.40 | 1.40 | 1.27 | 1.40 | 1.40 | 1.40 | 1.40 | 2.28 | 0.06 | 0.00 | 0.00 | 0.00 | 0.00 |      | 0    | 0    | 0    | 0    | 0    | 0    | 0    | 25   | 25   | 31   | 25   | 25   | 21   | 21   | 22   | 22   | 22 |
| 15. <i>S. minus</i> SKS161     | 1.40 | 1.40 | 1.27 | 1.40 | 1.40 | 1.40 | 1.40 | 2.28 | 0.06 | 0.00 | 0.00 | 0.00 | 0.00 | 0.00 |      | 0    | 0    | 0    | 0    | 0    | 0    | 25   | 25   | 31   | 25   | 25   | 21   | 21   | 22   | 22   | 22 |
| 16. <i>S. minus</i> SKS182     | 1.40 | 1.40 | 1.27 | 1.40 | 1.40 | 1.40 | 1.40 | 2.28 | 0.06 | 0.00 | 0.00 | 0.00 | 0.00 | 0.00 | 0.00 |      | 0    | 0    | 0    | 0    | 0    | 25   | 25   | 31   | 25   | 25   | 21   | 21   | 22   | 22   | 22 |
| 17. <i>S. minus</i> SKS743     | 1.40 | 1.40 | 1.27 | 1.40 | 1.40 | 1.40 | 1.40 | 2.28 | 0.06 | 0.00 | 0.00 | 0.00 | 0.00 | 0.00 | 0.00 | 0.00 |      | 0    | 0    | 0    | 0    | 25   | 25   | 31   | 25   | 25   | 21   | 21   | 22   | 22   | 22 |
| 18. <i>S. minus</i> SKS214     | 1.40 | 1.40 | 1.27 | 1.40 | 1.40 | 1.40 | 1.40 | 2.28 | 0.06 | 0.00 | 0.00 | 0.00 | 0.00 | 0.00 | 0.00 | 0.00 | 0.00 |      | 0    | 0    | 0    | 25   | 25   | 31   | 25   | 25   | 21   | 21   | 22   | 22   | 22 |
| 19. <i>S. minus</i> SKS386     | 1.40 | 1.40 | 1.27 | 1.40 | 1.40 | 1.40 | 1.40 | 2.28 | 0.06 | 0.00 | 0.00 | 0.00 | 0.00 | 0.00 | 0.00 | 0.00 | 0.00 | 0.00 |      | 0    | 0    | 25   | 25   | 31   | 25   | 25   | 21   | 21   | 22   | 22   | 22 |
| 20. <i>S. minus</i> SKS1018    | 1.40 | 1.40 | 1.27 | 1.40 | 1.40 | 1.40 | 1.40 | 2.28 | 0.06 | 0.00 | 0.00 | 0.00 | 0.00 | 0.00 | 0.00 | 0.00 | 0.00 | 0.00 | 0.00 |      | 0    | 25   | 25   | 31   | 25   | 25   | 21   | 21   | 22   | 22   | 22 |
| 21. <i>S. minus</i> SKS1073    | 1.40 | 1.40 | 1.27 | 1.40 | 1.40 | 1.40 | 1.40 | 2.28 | 0.06 | 0.00 | 0.00 | 0.00 | 0.00 | 0.00 | 0.00 | 0.00 | 0.00 | 0.00 | 0.00 | 0.00 |      | 25   | 25   | 31   | 25   | 25   | 21   | 21   | 22   | 22   | 22 |
| 22. <i>S. subtilis</i> SKS937  | 2.09 | 2.09 | 1.97 | 2.09 | 2.09 | 2.09 | 2.09 | 3.30 | 1.52 | 1.59 | 1.59 | 1.59 | 1.59 | 1.59 | 1.59 | 1.59 | 1.59 | 1.59 | 1.59 | 1.59 | 1.59 |      | 0    | 45   | 38   | 38   | 38   | 38   | 35   | 35   | 35 |
| 23. <i>S. subtilis</i> SKS1056 | 2.09 | 2.09 | 1.97 | 2.09 | 2.09 | 2.09 | 2.09 | 3.30 | 1.52 | 1.59 | 1.59 | 1.59 | 1.59 | 1.59 | 1.59 | 1.59 | 1.59 | 1.59 | 1.59 | 1.59 | 1.59 | 0.00 |      | 45   | 38   | 38   | 38   | 38   | 35   | 35   | 35 |
| 24. <i>S. teres</i> SKS1045    | 2.54 | 2.54 | 2.54 | 2.54 | 2.54 | 2.54 | 2.54 | 1.52 | 2.03 | 1.97 | 1.97 | 1.97 | 1.97 | 1.97 | 1.97 | 1.97 | 1.97 | 1.97 | 1.97 | 1.97 | 1.97 | 2.85 | 2.85 |      | 11   | 11   | 12   | 12   | 21   | 21   | 21 |
| 25. <i>S. teres</i> SKS026     | 2.54 | 2.54 | 2.41 | 2.54 | 2.54 | 2.54 | 2.54 | 1.78 | 1.65 | 1.59 | 1.59 | 1.59 | 1.59 | 1.59 | 1.59 | 1.59 | 1.59 | 1.59 | 1.59 | 1.59 | 1.59 | 2.41 | 2.41 | 0.70 |      | 0    | 4    | 4    | 13   | 13   | 13 |
| 26. <i>S. teres</i> SKS351     | 2.54 | 2.54 | 2.41 | 2.54 | 2.54 | 2.54 | 2.54 | 1.78 | 1.65 | 1.59 | 1.59 | 1.59 | 1.59 | 1.59 | 1.59 | 1.59 | 1.59 | 1.59 | 1.59 | 1.59 | 1.59 | 2.41 | 2.41 | 0.70 | 0.00 |      | 4    | 4    | 13   | 13   |    |
| 27. <i>S. teres</i> SKS187     | 2.41 | 2.41 | 2.28 | 2.41 | 2.41 | 2.41 | 2.41 | 1.65 | 1.40 | 1.33 | 1.33 | 1.33 | 1.33 | 1.33 | 1.33 | 1.33 | 1.33 | 1.33 | 1.33 | 1.33 | 1.33 | 2.41 | 2.41 | 0.76 | 0.25 | 0.25 |      | 0    | 11   | 11   | 11 |
| 28. <i>S. teres</i> SKS085     | 2.41 | 2.41 | 2.28 | 2.41 | 2.41 | 2.41 | 2.41 | 1.65 | 1.40 | 1.33 | 1.33 | 1.33 | 1.33 | 1.33 | 1.33 | 1.33 | 1.33 | 1.33 | 1.33 | 1.33 | 1.33 | 2.41 | 2.41 | 0.76 | 0.25 | 0.25 | 0.00 |      | 11   | 11   | 11 |
| 29. <i>S. yagiui</i> SKS977    | 2.28 | 2.28 | 2.16 | 2.28 | 2.28 | 2.28 | 2.28 | 1.78 | 1.46 | 1.40 | 1.40 | 1.40 | 1.40 | 1.40 | 1.40 | 1.40 | 1.40 | 1.40 | 1.40 | 1.40 | 1.40 | 2.22 | 2.22 | 1.33 | 0.82 | 0.82 | 0.70 | 0.70 |      | 0    | 0  |
| 30. <i>S. yagiui</i> SKS164    | 2.28 | 2.28 | 2.16 | 2.28 | 2.28 | 2.28 | 2.28 | 1.78 | 1.46 | 1.40 | 1.40 | 1.40 | 1.40 | 1.40 | 1.40 | 1.40 | 1.40 | 1.40 | 1.40 | 1.40 | 1.40 | 2.22 | 2.22 | 1.33 | 0.82 | 0.82 | 0.70 | 0.70 | 0.00 |      | 0  |
| 31. <i>S. yagiui</i> SKS071    | 2.28 | 2.28 | 2.16 | 2.28 | 2.28 | 2.28 | 2.28 | 1.78 | 1.46 | 1.40 | 1.40 | 1.40 | 1.40 | 1.40 | 1.40 | 1.40 | 1.40 | 1.40 | 1.40 | 1.40 | 1.40 | 2.22 | 2.22 | 1.33 | 0.82 | 0.82 | 0.70 | 0.70 | 0.00 | 0.00 |    |



Supplementary Table S14. Numbers of nucleotide differences (above diagonal) and pairwise distances (% , below diagonal) of the ITS regions among 31 *Spirostomum* populations.

| Taxon                          | 1     | 2     | 3     | 4     | 5     | 6     | 7     | 8     | 9     | 10    | 11    | 12    | 13    | 14    | 15    | 16    | 17    | 18    | 19    | 20    | 21    | 22    | 23    | 24   | 25   | 26   | 27   | 28   | 29   | 30   | 31 |
|--------------------------------|-------|-------|-------|-------|-------|-------|-------|-------|-------|-------|-------|-------|-------|-------|-------|-------|-------|-------|-------|-------|-------|-------|-------|------|------|------|------|------|------|------|----|
| 1. <i>S. ambiguum</i> SKS167   |       | 0     | 0     | 0     | 0     | 0     | 0     | 25    | 11    | 11    | 11    | 11    | 11    | 11    | 12    | 9     | 11    | 10    | 10    | 11    | 11    | 3     | 3     | 19   | 21   | 21   | 23   | 19   | 29   | 29   | 29 |
| 2. <i>S. ambiguum</i> SKS185   | 0.00  |       | 0     | 0     | 0     | 0     | 0     | 25    | 11    | 11    | 11    | 11    | 11    | 11    | 12    | 9     | 11    | 10    | 10    | 11    | 11    | 3     | 3     | 19   | 21   | 21   | 23   | 19   | 29   | 29   | 29 |
| 3. <i>S. ambiguum</i> SKS254   | 0.00  | 0.00  |       | 0     | 0     | 0     | 0     | 25    | 11    | 11    | 11    | 11    | 11    | 11    | 12    | 9     | 11    | 10    | 10    | 11    | 11    | 3     | 3     | 19   | 21   | 21   | 23   | 19   | 29   | 29   | 29 |
| 4. <i>S. ambiguum</i> SKS363   | 0.00  | 0.00  | 0.00  |       | 0     | 0     | 0     | 25    | 11    | 11    | 11    | 11    | 11    | 11    | 12    | 9     | 11    | 10    | 10    | 11    | 11    | 3     | 3     | 19   | 21   | 21   | 23   | 19   | 29   | 29   | 29 |
| 5. <i>S. ambiguum</i> SKS779   | 0.00  | 0.00  | 0.00  | 0.00  |       | 0     | 0     | 25    | 11    | 11    | 11    | 11    | 11    | 11    | 12    | 9     | 11    | 10    | 10    | 11    | 11    | 3     | 3     | 19   | 21   | 21   | 23   | 19   | 29   | 29   | 29 |
| 6. <i>S. ambiguum</i> SKS949   | 0.00  | 0.00  | 0.00  | 0.00  | 0.00  |       | 0     | 25    | 11    | 11    | 11    | 11    | 11    | 11    | 12    | 9     | 11    | 10    | 10    | 11    | 11    | 3     | 3     | 19   | 21   | 21   | 23   | 19   | 29   | 29   | 29 |
| 7. <i>S. ambiguum</i> SKS989   | 0.00  | 0.00  | 0.00  | 0.00  | 0.00  | 0.00  |       | 25    | 11    | 11    | 11    | 11    | 11    | 11    | 12    | 9     | 11    | 10    | 10    | 11    | 11    | 3     | 3     | 19   | 21   | 21   | 23   | 19   | 29   | 29   | 29 |
| 8. <i>S. caudatum</i> SKS302   | 10.68 | 10.68 | 10.68 | 10.68 | 10.68 | 10.68 | 10.68 |       | 31    | 31    | 31    | 31    | 31    | 31    | 30    | 29    | 31    | 30    | 30    | 31    | 31    | 25    | 25    | 19   | 20   | 20   | 19   | 19   | 24   | 24   | 24 |
| 9. <i>S. minus</i> SKS161      | 4.70  | 4.70  | 4.70  | 4.70  | 4.70  | 4.70  | 4.70  | 13.25 |       | 0     | 0     | 0     | 0     | 0     | 1     | 2     | 0     | 1     | 1     | 0     | 0     | 12    | 12    | 25   | 27   | 27   | 27   | 25   | 32   | 32   | 32 |
| 10. <i>S. minus</i> SKS214     | 4.70  | 4.70  | 4.70  | 4.70  | 4.70  | 4.70  | 4.70  | 13.25 | 0.00  |       | 0     | 0     | 0     | 0     | 1     | 2     | 0     | 1     | 1     | 0     | 0     | 12    | 12    | 25   | 27   | 27   | 27   | 25   | 32   | 32   | 32 |
| 11. <i>S. minus</i> SKS386     | 4.70  | 4.70  | 4.70  | 4.70  | 4.70  | 4.70  | 4.70  | 13.25 | 0.00  | 0.00  |       | 0     | 0     | 0     | 1     | 2     | 0     | 1     | 1     | 0     | 0     | 12    | 12    | 25   | 27   | 27   | 27   | 25   | 32   | 32   | 32 |
| 12. <i>S. minus</i> SKS182     | 4.70  | 4.70  | 4.70  | 4.70  | 4.70  | 4.70  | 4.70  | 13.25 | 0.00  | 0.00  | 0.00  |       | 0     | 0     | 1     | 2     | 0     | 1     | 1     | 0     | 0     | 12    | 12    | 25   | 27   | 27   | 27   | 25   | 32   | 32   | 32 |
| 13. <i>S. minus</i> SKS840     | 4.70  | 4.70  | 4.70  | 4.70  | 4.70  | 4.70  | 4.70  | 13.25 | 0.00  | 0.00  | 0.00  | 0.00  |       | 0     | 1     | 2     | 0     | 1     | 1     | 0     | 0     | 12    | 12    | 25   | 27   | 27   | 27   | 25   | 32   | 32   | 32 |
| 14. <i>S. minus</i> SKS1018    | 4.70  | 4.70  | 4.70  | 4.70  | 4.70  | 4.70  | 4.70  | 13.25 | 0.00  | 0.00  | 0.00  | 0.00  | 0.00  |       | 1     | 2     | 0     | 1     | 1     | 0     | 0     | 12    | 12    | 25   | 27   | 27   | 27   | 25   | 32   | 32   | 32 |
| 15. <i>S. minus</i> SKS731     | 5.13  | 5.13  | 5.13  | 5.13  | 5.13  | 5.13  | 5.13  | 12.82 | 0.43  | 0.43  | 0.43  | 0.43  | 0.43  | 0.43  |       | 3     | 1     | 2     | 2     | 1     | 1     | 13    | 13    | 25   | 27   | 27   | 26   | 25   | 31   | 31   | 31 |
| 16. <i>S. minus</i> GuS1058    | 3.85  | 3.85  | 3.85  | 3.85  | 3.85  | 3.85  | 3.85  | 12.39 | 0.85  | 0.85  | 0.85  | 0.85  | 0.85  | 0.85  | 1.28  |       | 2     | 1     | 1     | 2     | 2     | 10    | 10    | 23   | 25   | 25   | 26   | 23   | 30   | 30   | 30 |
| 17. <i>S. minus</i> SKS1044    | 4.70  | 4.70  | 4.70  | 4.70  | 4.70  | 4.70  | 4.70  | 13.25 | 0.00  | 0.00  | 0.00  | 0.00  | 0.00  | 0.00  | 0.43  | 0.85  |       | 1     | 1     | 0     | 0     | 12    | 12    | 25   | 27   | 27   | 27   | 25   | 32   | 32   | 32 |
| 18. <i>S. minus</i> SKS794     | 4.27  | 4.27  | 4.27  | 4.27  | 4.27  | 4.27  | 4.27  | 12.82 | 0.43  | 0.43  | 0.43  | 0.43  | 0.43  | 0.43  | 0.85  | 0.43  | 0.43  |       | 0     | 1     | 1     | 11    | 11    | 24   | 26   | 26   | 26   | 24   | 31   | 31   | 31 |
| 19. <i>S. minus</i> SKS939     | 4.27  | 4.27  | 4.27  | 4.27  | 4.27  | 4.27  | 4.27  | 12.82 | 0.43  | 0.43  | 0.43  | 0.43  | 0.43  | 0.43  | 0.85  | 0.43  | 0.43  | 0.00  |       | 1     | 1     | 11    | 11    | 24   | 26   | 26   | 26   | 24   | 31   | 31   | 31 |
| 20. <i>S. minus</i> SKS1073    | 4.70  | 4.70  | 4.70  | 4.70  | 4.70  | 4.70  | 4.70  | 13.25 | 0.00  | 0.00  | 0.00  | 0.00  | 0.00  | 0.00  | 0.43  | 0.85  | 0.00  | 0.43  | 0.43  |       | 0     | 12    | 12    | 25   | 27   | 27   | 27   | 25   | 32   | 32   | 32 |
| 21. <i>S. minus</i> SKS743     | 4.70  | 4.70  | 4.70  | 4.70  | 4.70  | 4.70  | 4.70  | 13.25 | 0.00  | 0.00  | 0.00  | 0.00  | 0.00  | 0.00  | 0.43  | 0.85  | 0.00  | 0.43  | 0.43  | 0.00  |       | 12    | 12    | 25   | 27   | 27   | 27   | 25   | 32   | 32   | 32 |
| 22. <i>S. subtilis</i> SKS937  | 1.28  | 1.28  | 1.28  | 1.28  | 1.28  | 1.28  | 1.28  | 10.68 | 5.13  | 5.13  | 5.13  | 5.13  | 5.13  | 5.13  | 5.56  | 4.27  | 5.13  | 4.70  | 4.70  | 5.13  | 5.13  |       | 0     | 19   | 21   | 21   | 23   | 19   | 29   | 29   | 29 |
| 23. <i>S. subtilis</i> SKS1056 | 1.28  | 1.28  | 1.28  | 1.28  | 1.28  | 1.28  | 1.28  | 10.68 | 5.13  | 5.13  | 5.13  | 5.13  | 5.13  | 5.13  | 5.56  | 4.27  | 5.13  | 4.70  | 4.70  | 5.13  | 5.13  | 0.00  |       | 19   | 21   | 21   | 23   | 19   | 29   | 29   | 29 |
| 24. <i>S. teres</i> SKS026     | 8.12  | 8.12  | 8.12  | 8.12  | 8.12  | 8.12  | 8.12  | 8.12  | 10.68 | 10.68 | 10.68 | 10.68 | 10.68 | 10.68 | 10.68 | 9.83  | 10.68 | 10.26 | 10.26 | 10.68 | 10.68 | 8.12  | 8.12  |      | 3    | 3    | 14   | 0    | 14   | 14   | 14 |
| 25. <i>S. teres</i> SKS187     | 8.97  | 8.97  | 8.97  | 8.97  | 8.97  | 8.97  | 8.97  | 8.97  | 8.55  | 11.54 | 11.54 | 11.54 | 11.54 | 11.54 | 11.54 | 10.68 | 11.54 | 11.11 | 11.11 | 11.54 | 11.54 | 8.97  | 8.97  | 1.28 |      | 0    | 13   | 3    | 15   | 15   | 15 |
| 26. <i>S. teres</i> SKS085     | 8.97  | 8.97  | 8.97  | 8.97  | 8.97  | 8.97  | 8.97  | 8.55  | 11.54 | 11.54 | 11.54 | 11.54 | 11.54 | 11.54 | 11.54 | 10.68 | 11.54 | 11.11 | 11.11 | 11.54 | 11.54 | 8.97  | 8.97  | 1.28 | 0.00 |      | 13   | 3    | 15   | 15   | 15 |
| 27. <i>S. teres</i> SKS1045    | 9.83  | 9.83  | 9.83  | 9.83  | 9.83  | 9.83  | 9.83  | 8.12  | 11.54 | 11.54 | 11.54 | 11.54 | 11.54 | 11.54 | 11.11 | 11.11 | 11.54 | 11.11 | 11.11 | 11.54 | 11.54 | 9.83  | 9.83  | 5.98 | 5.56 | 5.56 |      | 14   | 15   | 15   | 15 |
| 28. <i>S. teres</i> SKS351     | 8.12  | 8.12  | 8.12  | 8.12  | 8.12  | 8.12  | 8.12  | 8.12  | 10.68 | 10.68 | 10.68 | 10.68 | 10.68 | 10.68 | 10.68 | 9.83  | 10.68 | 10.26 | 10.26 | 10.68 | 10.68 | 8.12  | 8.12  | 0.00 | 1.28 | 1.28 | 5.98 |      | 14   | 14   | 14 |
| 29. <i>S. yagiui</i> SKS071    | 12.39 | 12.39 | 12.39 | 12.39 | 12.39 | 12.39 | 12.39 | 10.26 | 13.68 | 13.68 | 13.68 | 13.68 | 13.68 | 13.68 | 13.25 | 12.82 | 13.68 | 13.25 | 13.25 | 13.68 | 13.68 | 12.39 | 12.39 | 5.98 | 6.41 | 6.41 | 6.41 | 5.98 |      | 0    | 0  |
| 30. <i>S. yagiui</i> SKS164    | 12.39 | 12.39 | 12.39 | 12.39 | 12.39 | 12.39 | 12.39 | 10.26 | 13.68 | 13.68 | 13.68 | 13.68 | 13.68 | 13.68 | 13.25 | 12.82 | 13.68 | 13.25 | 13.25 | 13.68 | 13.68 | 12.39 | 12.39 | 5.98 | 6.41 | 6.41 | 6.41 | 5.98 | 0.00 |      | 0  |
| 31. <i>S. yagiui</i> SKS977    | 12.39 | 12.39 | 12.39 | 12.39 | 12.39 | 12.39 | 12.39 | 10.26 | 13.68 | 13.68 | 13.68 | 13.68 | 13.68 | 13.68 | 13.25 | 12.82 | 13.68 | 13.25 | 13.25 | 13.68 | 13.68 | 12.39 | 12.39 | 5.98 | 6.41 | 6.41 | 6.41 | 5.98 | 0.00 | 0.00 |    |

**Supplementary Table S15.** Numbers of nucleotide differences (above diagonal) and pairwise distances (% below diagonal) of the D1D2 domain of the 28S rRNA gene sequences among 31 *Spirostomum* populations.

| Taxon                          | 1    | 2    | 3    | 4    | 5    | 6    | 7    | 8    | 9    | 10   | 11   | 12   | 13   | 14   | 15   | 16   | 17   | 18   | 19   | 20   | 21   | 22   | 23   | 24   | 25   | 26   | 27   | 28   | 29   | 30   | 31 |    |
|--------------------------------|------|------|------|------|------|------|------|------|------|------|------|------|------|------|------|------|------|------|------|------|------|------|------|------|------|------|------|------|------|------|----|----|
| 1. <i>S. ambiguum</i> SKS185   |      | 0    | 0    | 0    | 1    | 2    | 2    | 39   | 18   | 18   | 18   | 18   | 18   | 18   | 18   | 18   | 18   | 18   | 18   | 18   | 18   | 22   | 22   | 44   | 43   | 45   | 45   | 43   | 39   | 39   | 39 |    |
| 2. <i>S. ambiguum</i> SKS363   | 0.00 |      | 0    | 0    | 1    | 2    | 2    | 39   | 18   | 18   | 18   | 18   | 18   | 18   | 18   | 18   | 18   | 18   | 18   | 18   | 18   | 22   | 22   | 44   | 43   | 45   | 45   | 43   | 39   | 39   | 39 |    |
| 3. <i>S. ambiguum</i> SKS949   | 0.00 | 0.00 |      | 0    | 1    | 2    | 2    | 39   | 18   | 18   | 18   | 18   | 18   | 18   | 18   | 18   | 18   | 18   | 18   | 18   | 18   | 22   | 22   | 44   | 43   | 45   | 45   | 43   | 39   | 39   | 39 |    |
| 4. <i>S. ambiguum</i> SKS989   | 0.00 | 0.00 | 0.00 |      | 1    | 2    | 2    | 39   | 18   | 18   | 18   | 18   | 18   | 18   | 18   | 18   | 18   | 18   | 18   | 18   | 18   | 22   | 22   | 44   | 43   | 45   | 45   | 43   | 39   | 39   | 39 |    |
| 5. <i>S. ambiguum</i> SKS779   | 0.21 | 0.21 | 0.21 | 0.21 |      | 1    | 1    | 40   | 17   | 17   | 17   | 17   | 17   | 17   | 17   | 17   | 17   | 17   | 17   | 17   | 17   | 21   | 21   | 45   | 44   | 46   | 46   | 44   | 40   | 40   | 40 |    |
| 6. <i>S. ambiguum</i> SKS167   | 0.42 | 0.42 | 0.42 | 0.42 | 0.21 |      | 0    | 39   | 16   | 16   | 16   | 16   | 16   | 16   | 16   | 16   | 16   | 16   | 16   | 16   | 16   | 20   | 20   | 44   | 43   | 45   | 45   | 43   | 39   | 39   | 39 |    |
| 7. <i>S. ambiguum</i> SKS254   | 0.42 | 0.42 | 0.42 | 0.42 | 0.21 | 0.00 |      | 39   | 16   | 16   | 16   | 16   | 16   | 16   | 16   | 16   | 16   | 16   | 16   | 16   | 16   | 20   | 20   | 44   | 43   | 45   | 45   | 43   | 39   | 39   | 39 |    |
| 8. <i>S. caudatum</i> SKS302   | 8.21 | 8.21 | 8.21 | 8.21 | 8.42 | 8.21 | 8.21 |      | 39   | 39   | 39   | 39   | 39   | 39   | 39   | 39   | 39   | 39   | 39   | 39   | 39   | 42   | 42   | 37   | 33   | 36   | 36   | 33   | 30   | 30   | 30 |    |
| 9. <i>S. minus</i> SKS939      | 3.79 | 3.79 | 3.79 | 3.79 | 3.58 | 3.37 | 3.37 | 8.21 |      | 0    | 0    | 0    | 0    | 0    | 0    | 0    | 0    | 0    | 0    | 0    | 0    | 22   | 22   | 36   | 34   | 36   | 36   | 34   | 36   | 36   | 36 |    |
| 10. <i>S. minus</i> SKS161     | 3.79 | 3.79 | 3.79 | 3.79 | 3.58 | 3.37 | 3.37 | 8.21 | 0.00 |      | 0    | 0    | 0    | 0    | 0    | 0    | 0    | 0    | 0    | 0    | 0    | 22   | 22   | 36   | 34   | 36   | 36   | 34   | 36   | 36   | 36 |    |
| 11. <i>S. minus</i> SKS214     | 3.79 | 3.79 | 3.79 | 3.79 | 3.58 | 3.37 | 3.37 | 8.21 | 0.00 | 0.00 |      | 0    | 0    | 0    | 0    | 0    | 0    | 0    | 0    | 0    | 0    | 22   | 22   | 36   | 34   | 36   | 36   | 34   | 36   | 36   | 36 |    |
| 12. <i>S. minus</i> SKS794     | 3.79 | 3.79 | 3.79 | 3.79 | 3.58 | 3.37 | 3.37 | 8.21 | 0.00 | 0.00 | 0.00 |      | 0    | 0    | 0    | 0    | 0    | 0    | 0    | 0    | 0    | 22   | 22   | 36   | 34   | 36   | 36   | 34   | 36   | 36   | 36 |    |
| 13. <i>S. minus</i> SKS840     | 3.79 | 3.79 | 3.79 | 3.79 | 3.58 | 3.37 | 3.37 | 8.21 | 0.00 | 0.00 | 0.00 | 0.00 |      | 0    | 0    | 0    | 0    | 0    | 0    | 0    | 0    | 22   | 22   | 36   | 34   | 36   | 36   | 34   | 36   | 36   | 36 |    |
| 14. <i>S. minus</i> SKS1018    | 3.79 | 3.79 | 3.79 | 3.79 | 3.58 | 3.37 | 3.37 | 8.21 | 0.00 | 0.00 | 0.00 | 0.00 | 0.00 |      | 0    | 0    | 0    | 0    | 0    | 0    | 0    | 22   | 22   | 36   | 34   | 36   | 36   | 34   | 36   | 36   | 36 |    |
| 15. <i>S. minus</i> SKS1044    | 3.79 | 3.79 | 3.79 | 3.79 | 3.58 | 3.37 | 3.37 | 8.21 | 0.00 | 0.00 | 0.00 | 0.00 | 0.00 | 0.00 |      | 0    | 0    | 0    | 0    | 0    | 0    | 22   | 22   | 36   | 34   | 36   | 36   | 34   | 36   | 36   | 36 |    |
| 16. <i>S. minus</i> SKS731     | 3.79 | 3.79 | 3.79 | 3.79 | 3.58 | 3.37 | 3.37 | 8.21 | 0.00 | 0.00 | 0.00 | 0.00 | 0.00 | 0.00 | 0.00 |      | 0    | 0    | 0    | 0    | 0    | 22   | 22   | 36   | 34   | 36   | 36   | 34   | 36   | 36   | 36 |    |
| 17. <i>S. minus</i> SKS743     | 3.79 | 3.79 | 3.79 | 3.79 | 3.58 | 3.37 | 3.37 | 8.21 | 0.00 | 0.00 | 0.00 | 0.00 | 0.00 | 0.00 | 0.00 | 0.00 |      | 0    | 0    | 0    | 0    | 22   | 22   | 36   | 34   | 36   | 36   | 34   | 36   | 36   | 36 |    |
| 18. <i>S. minus</i> GuS1058    | 3.79 | 3.79 | 3.79 | 3.79 | 3.58 | 3.37 | 3.37 | 8.21 | 0.00 | 0.00 | 0.00 | 0.00 | 0.00 | 0.00 | 0.00 | 0.00 | 0.00 |      | 0    | 0    | 0    | 22   | 22   | 36   | 34   | 36   | 36   | 34   | 36   | 36   | 36 |    |
| 19. <i>S. minus</i> SKS1073    | 3.79 | 3.79 | 3.79 | 3.79 | 3.58 | 3.37 | 3.37 | 8.21 | 0.00 | 0.00 | 0.00 | 0.00 | 0.00 | 0.00 | 0.00 | 0.00 | 0.00 | 0.00 |      | 0    | 0    | 22   | 22   | 36   | 34   | 36   | 36   | 34   | 36   | 36   | 36 |    |
| 20. <i>S. minus</i> SKS386     | 3.79 | 3.79 | 3.79 | 3.79 | 3.58 | 3.37 | 3.37 | 8.21 | 0.00 | 0.00 | 0.00 | 0.00 | 0.00 | 0.00 | 0.00 | 0.00 | 0.00 | 0.00 | 0.00 |      | 0    | 22   | 22   | 36   | 34   | 36   | 36   | 34   | 36   | 36   | 36 |    |
| 21. <i>S. minus</i> SKS182     | 3.79 | 3.79 | 3.79 | 3.79 | 3.58 | 3.37 | 3.37 | 8.21 | 0.00 | 0.00 | 0.00 | 0.00 | 0.00 | 0.00 | 0.00 | 0.00 | 0.00 | 0.00 | 0.00 | 0.00 |      | 22   | 22   | 36   | 34   | 36   | 36   | 34   | 36   | 36   | 36 |    |
| 22. <i>S. subtilis</i> SKS1056 | 4.63 | 4.63 | 4.63 | 4.63 | 4.42 | 4.21 | 4.21 | 8.84 | 4.63 | 4.63 | 4.63 | 4.63 | 4.63 | 4.63 | 4.63 | 4.63 | 4.63 | 4.63 | 4.63 | 4.63 | 4.63 |      | 0    | 44   | 44   | 46   | 46   | 44   | 42   | 42   | 42 |    |
| 23. <i>S. subtilis</i> SKS937  | 4.63 | 4.63 | 4.63 | 4.63 | 4.42 | 4.21 | 4.21 | 8.84 | 4.63 | 4.63 | 4.63 | 4.63 | 4.63 | 4.63 | 4.63 | 4.63 | 4.63 | 4.63 | 4.63 | 4.63 | 4.63 | 4.63 | 0.00 |      | 44   | 44   | 46   | 46   | 44   | 42   | 42 | 42 |
| 24. <i>S. teres</i> SKS1045    | 9.26 | 9.26 | 9.26 | 9.26 | 9.47 | 9.26 | 9.26 | 7.79 | 7.58 | 7.58 | 7.58 | 7.58 | 7.58 | 7.58 | 7.58 | 7.58 | 7.58 | 7.58 | 7.58 | 7.58 | 7.58 | 9.26 | 9.26 |      | 21   | 21   | 21   | 21   | 21   | 21   | 21 |    |
| 25. <i>S. teres</i> SKS187     | 9.05 | 9.05 | 9.05 | 9.05 | 9.26 | 9.05 | 9.05 | 6.95 | 7.16 | 7.16 | 7.16 | 7.16 | 7.16 | 7.16 | 7.16 | 7.16 | 7.16 | 7.16 | 7.16 | 7.16 | 7.16 | 9.26 | 9.26 | 4.42 |      | 5    | 5    | 0    | 16   | 16   | 16 |    |
| 26. <i>S. teres</i> SKS026     | 9.47 | 9.47 | 9.47 | 9.47 | 9.68 | 9.47 | 9.47 | 7.58 | 7.58 | 7.58 | 7.58 | 7.58 | 7.58 | 7.58 | 7.58 | 7.58 | 7.58 | 7.58 | 7.58 | 7.58 | 7.58 | 9.68 | 9.68 | 4.42 | 1.05 |      | 0    | 5    | 13   | 13   | 13 |    |
| 27. <i>S. teres</i> SKS351     | 9.47 | 9.47 | 9.47 | 9.47 | 9.68 | 9.47 | 9.47 | 7.58 | 7.58 | 7.58 | 7.58 | 7.58 | 7.58 | 7.58 | 7.58 | 7.58 | 7.58 | 7.58 | 7.58 | 7.58 | 7.58 | 9.68 | 9.68 | 4.42 | 1.05 | 0.00 |      | 5    | 13   | 13   | 13 |    |
| 28. <i>S. teres</i> SKS085     | 9.05 | 9.05 | 9.05 | 9.05 | 9.26 | 9.05 | 9.05 | 6.95 | 7.16 | 7.16 | 7.16 | 7.16 | 7.16 | 7.16 | 7.16 | 7.16 | 7.16 | 7.16 | 7.16 | 7.16 | 7.16 | 9.26 | 9.26 | 4.42 | 0.00 | 1.05 | 1.05 |      | 16   | 16   | 16 |    |
| 29. <i>S. yagiui</i> SKS071    | 8.21 | 8.21 | 8.21 | 8.21 | 8.42 | 8.21 | 8.21 | 6.32 | 7.58 | 7.58 | 7.58 | 7.58 | 7.58 | 7.58 | 7.58 | 7.58 | 7.58 | 7.58 | 7.58 | 7.58 | 7.58 | 8.84 | 8.84 | 4.42 | 3.37 | 2.74 | 2.74 | 3.37 |      | 0    | 0  |    |
| 30. <i>S. yagiui</i> SKS164    | 8.21 | 8.21 | 8.21 | 8.21 | 8.42 | 8.21 | 8.21 | 6.32 | 7.58 | 7.58 | 7.58 | 7.58 | 7.58 | 7.58 | 7.58 | 7.58 | 7.58 | 7.58 | 7.58 | 7.58 | 7.58 | 8.84 | 8.84 | 4.42 | 3.37 | 2.74 | 2.74 | 3.37 | 0.00 |      | 0  |    |
| 31. <i>S. yagiui</i> SKS977    | 8.21 | 8.21 | 8.21 | 8.21 | 8.42 | 8.21 | 8.21 | 6.32 | 7.58 | 7.58 | 7.58 | 7.58 | 7.58 | 7.58 | 7.58 | 7.58 | 7.58 | 7.58 | 7.58 | 7.58 | 7.58 | 8.84 | 8.84 | 4.42 | 3.37 | 2.74 | 2.74 | 3.37 | 0.00 | 0.00 |    |    |

**Supplementary Table S16.** Numbers of nucleotide differences (above diagonal) and pairwise distances (% , below diagonal) of the alpha-tubulin gene sequences among 31 *Spirostomum* populations.

| Taxon                          | 1     | 2     | 3     | 4     | 5     | 6     | 7     | 8     | 9     | 10    | 11    | 12    | 13    | 14    | 15    | 16    | 17    | 18    | 19    | 20    | 21    | 22    | 23    | 24    | 25    | 26    | 27    | 28    | 29    | 30   | 31   |     |
|--------------------------------|-------|-------|-------|-------|-------|-------|-------|-------|-------|-------|-------|-------|-------|-------|-------|-------|-------|-------|-------|-------|-------|-------|-------|-------|-------|-------|-------|-------|-------|------|------|-----|
| 1. <i>S. ambiguum</i> SKS989   |       | 0     | 0     | 3     | 0     | 3     | 0     | 100   | 99    | 99    | 99    | 99    | 99    | 100   | 100   | 99    | 100   | 99    | 99    | 99    | 99    | 99    | 89    | 88    | 110   | 119   | 115   | 119   | 110   | 101  | 100  | 101 |
| 2. <i>S. ambiguum</i> SKS363   | 0.00  |       | 0     | 3     | 0     | 3     | 0     | 100   | 99    | 99    | 99    | 99    | 99    | 100   | 100   | 99    | 100   | 99    | 99    | 99    | 99    | 99    | 89    | 88    | 110   | 119   | 115   | 119   | 110   | 101  | 100  | 101 |
| 3. <i>S. ambiguum</i> SKS779   | 0.00  | 0.00  |       | 3     | 0     | 3     | 0     | 100   | 99    | 99    | 99    | 99    | 99    | 100   | 100   | 99    | 100   | 99    | 99    | 99    | 99    | 99    | 89    | 88    | 110   | 119   | 115   | 119   | 110   | 101  | 100  | 101 |
| 4. <i>S. ambiguum</i> SKS254   | 0.32  | 0.32  | 0.32  |       | 3     | 0     | 3     | 102   | 99    | 99    | 99    | 99    | 99    | 100   | 100   | 99    | 100   | 99    | 99    | 99    | 99    | 99    | 89    | 88    | 110   | 119   | 113   | 119   | 110   | 99   | 98   | 99  |
| 5. <i>S. ambiguum</i> SKS. 949 | 0.00  | 0.00  | 0.00  | 0.32  |       | 3     | 0     | 100   | 99    | 99    | 99    | 99    | 99    | 100   | 100   | 99    | 100   | 99    | 99    | 99    | 99    | 99    | 89    | 88    | 110   | 119   | 115   | 119   | 110   | 101  | 100  | 101 |
| 6. <i>S. ambiguum</i> SKS167   | 0.32  | 0.32  | 0.32  | 0.00  | 0.32  |       | 3     | 102   | 99    | 99    | 99    | 99    | 99    | 100   | 100   | 99    | 100   | 99    | 99    | 99    | 99    | 99    | 89    | 88    | 110   | 119   | 113   | 119   | 110   | 99   | 98   | 99  |
| 7. <i>S. ambiguum</i> SKS185   | 0.00  | 0.00  | 0.00  | 0.32  | 0.00  | 0.32  |       | 100   | 99    | 99    | 99    | 99    | 99    | 100   | 100   | 99    | 100   | 99    | 99    | 99    | 99    | 99    | 89    | 88    | 110   | 119   | 115   | 119   | 110   | 101  | 100  | 101 |
| 8. <i>S. caudatum</i> SKS813   | 10.76 | 10.76 | 10.76 | 10.98 | 10.76 | 10.98 | 10.76 |       | 108   | 108   | 108   | 108   | 108   | 109   | 109   | 108   | 108   | 108   | 108   | 108   | 108   | 117   | 118   | 100   | 98    | 97    | 100   | 100   | 107   | 106  | 107  |     |
| 9. <i>S. minus</i> SKS182      | 10.66 | 10.66 | 10.66 | 10.66 | 10.66 | 10.66 | 10.66 | 11.63 |       | 0     | 0     | 0     | 0     | 1     | 2     | 0     | 1     | 0     | 0     | 0     | 0     | 0     | 67    | 68    | 101   | 103   | 109   | 104   | 101   | 107  | 106  | 108 |
| 10. <i>S. minus</i> SKS731     | 10.66 | 10.66 | 10.66 | 10.66 | 10.66 | 10.66 | 10.66 | 11.63 | 0.00  |       | 0     | 0     | 0     | 1     | 2     | 0     | 1     | 0     | 0     | 0     | 0     | 0     | 67    | 68    | 101   | 103   | 109   | 104   | 101   | 107  | 106  | 108 |
| 11. <i>S. minus</i> SKS1044    | 10.66 | 10.66 | 10.66 | 10.66 | 10.66 | 10.66 | 10.66 | 11.63 | 0.00  | 0.00  |       | 0     | 0     | 1     | 2     | 0     | 1     | 0     | 0     | 0     | 0     | 0     | 67    | 68    | 101   | 103   | 109   | 104   | 101   | 107  | 106  | 108 |
| 12. <i>S. minus</i> SKS161     | 10.66 | 10.66 | 10.66 | 10.66 | 10.66 | 10.66 | 10.66 | 11.63 | 0.00  | 0.00  | 0.00  |       | 0     | 1     | 2     | 0     | 1     | 0     | 0     | 0     | 0     | 0     | 67    | 68    | 101   | 103   | 109   | 104   | 101   | 107  | 106  | 108 |
| 13. <i>S. minus</i> SKS1018    | 10.66 | 10.66 | 10.66 | 10.66 | 10.66 | 10.66 | 10.66 | 11.63 | 0.00  | 0.00  | 0.00  | 0.00  |       | 1     | 2     | 0     | 1     | 0     | 0     | 0     | 0     | 0     | 67    | 68    | 101   | 103   | 109   | 104   | 101   | 107  | 106  | 108 |
| 14. <i>S. minus</i> GuS1058    | 10.76 | 10.76 | 10.76 | 10.76 | 10.76 | 10.76 | 10.76 | 11.73 | 0.11  | 0.11  | 0.11  | 0.11  | 0.11  |       | 3     | 1     | 2     | 1     | 1     | 1     | 1     | 68    | 69    | 102   | 104   | 108   | 105   | 102   | 108   | 107  | 109  |     |
| 15. <i>S. minus</i> SKS1073    | 10.76 | 10.76 | 10.76 | 10.76 | 10.76 | 10.76 | 10.76 | 11.73 | 0.22  | 0.22  | 0.22  | 0.22  | 0.22  | 0.32  |       | 2     | 3     | 2     | 2     | 2     | 2     | 67    | 68    | 101   | 103   | 111   | 104   | 101   | 108   | 107  | 109  |     |
| 16. <i>S. minus</i> SKS939     | 10.66 | 10.66 | 10.66 | 10.66 | 10.66 | 10.66 | 10.66 | 11.63 | 0.00  | 0.00  | 0.00  | 0.00  | 0.00  | 0.11  | 0.22  |       | 1     | 0     | 0     | 0     | 0     | 0     | 67    | 68    | 101   | 103   | 109   | 104   | 101   | 107  | 106  | 108 |
| 17. <i>S. minus</i> SKS386     | 10.76 | 10.76 | 10.76 | 10.76 | 10.76 | 10.76 | 10.76 | 11.63 | 0.11  | 0.11  | 0.11  | 0.11  | 0.11  | 0.22  | 0.32  | 0.11  |       | 1     | 1     | 1     | 1     | 68    | 69    | 101   | 103   | 109   | 104   | 101   | 108   | 107  | 109  |     |
| 18. <i>S. minus</i> SKS794     | 10.66 | 10.66 | 10.66 | 10.66 | 10.66 | 10.66 | 10.66 | 11.63 | 0.00  | 0.00  | 0.00  | 0.00  | 0.00  | 0.11  | 0.22  | 0.00  | 0.11  |       | 0     | 0     | 0     | 0     | 67    | 68    | 101   | 103   | 109   | 104   | 101   | 107  | 106  | 108 |
| 19. <i>S. minus</i> SKS840     | 10.66 | 10.66 | 10.66 | 10.66 | 10.66 | 10.66 | 10.66 | 11.63 | 0.00  | 0.00  | 0.00  | 0.00  | 0.00  | 0.11  | 0.22  | 0.00  | 0.11  | 0.00  |       | 0     | 0     | 0     | 67    | 68    | 101   | 103   | 109   | 104   | 101   | 107  | 106  | 108 |
| 20. <i>S. minus</i> SKS743     | 10.66 | 10.66 | 10.66 | 10.66 | 10.66 | 10.66 | 10.66 | 11.63 | 0.00  | 0.00  | 0.00  | 0.00  | 0.00  | 0.11  | 0.22  | 0.00  | 0.11  | 0.00  | 0.00  |       | 0     | 0     | 67    | 68    | 101   | 103   | 109   | 104   | 101   | 107  | 106  | 108 |
| 21. <i>S. minus</i> SKS214     | 10.66 | 10.66 | 10.66 | 10.66 | 10.66 | 10.66 | 10.66 | 11.63 | 0.00  | 0.00  | 0.00  | 0.00  | 0.00  | 0.11  | 0.22  | 0.00  | 0.11  | 0.00  | 0.00  | 0.00  |       | 0     | 67    | 68    | 101   | 103   | 109   | 104   | 101   | 107  | 106  | 108 |
| 22. <i>S. subtilis</i> SKS937  | 9.58  | 9.58  | 9.58  | 9.58  | 9.58  | 9.58  | 9.58  | 12.59 | 7.21  | 7.21  | 7.21  | 7.21  | 7.21  | 7.32  | 7.21  | 7.21  | 7.32  | 7.21  | 7.21  | 7.21  | 7.21  | 7.21  |       | 1     | 106   | 117   | 114   | 116   | 106   | 100  | 99   | 100 |
| 23. <i>S. subtilis</i> SKS1056 | 9.47  | 9.47  | 9.47  | 9.47  | 9.47  | 9.47  | 9.47  | 12.70 | 7.32  | 7.32  | 7.32  | 7.32  | 7.32  | 7.43  | 7.32  | 7.32  | 7.43  | 7.32  | 7.32  | 7.32  | 7.32  | 7.32  | 0.11  |       | 107   | 118   | 115   | 117   | 107   | 99   | 98   | 99  |
| 24. <i>S. teres</i> SKS351     | 11.84 | 11.84 | 11.84 | 11.84 | 11.84 | 11.84 | 11.84 | 10.76 | 10.87 | 10.87 | 10.87 | 10.87 | 10.87 | 10.98 | 10.87 | 10.87 | 10.87 | 10.87 | 10.87 | 10.87 | 10.87 | 10.87 | 11.41 | 11.52 |       | 79    | 92    | 79    | 0     | 101  | 100  | 103 |
| 25. <i>S. teres</i> SKS187     | 12.81 | 12.81 | 12.81 | 12.81 | 12.81 | 12.81 | 12.81 | 10.55 | 11.09 | 11.09 | 11.09 | 11.09 | 11.09 | 11.19 | 11.09 | 11.09 | 11.09 | 11.09 | 11.09 | 11.09 | 11.09 | 11.09 | 12.59 | 12.70 | 8.50  |       | 93    | 3     | 79    | 95   | 96   | 95  |
| 26. <i>S. teres</i> SKS1045    | 12.38 | 12.38 | 12.38 | 12.16 | 12.38 | 12.16 | 12.38 | 10.44 | 11.73 | 11.73 | 11.73 | 11.73 | 11.73 | 11.63 | 11.95 | 11.73 | 11.73 | 11.73 | 11.73 | 11.73 | 11.73 | 12.27 | 12.38 | 9.90  | 10.01 |       | 92    | 92    | 91    | 93   | 93   |     |
| 27. <i>S. teres</i> SKS085     | 12.81 | 12.81 | 12.81 | 12.81 | 12.81 | 12.81 | 12.81 | 10.76 | 11.19 | 11.19 | 11.19 | 11.19 | 11.19 | 11.30 | 11.19 | 11.19 | 11.19 | 11.19 | 11.19 | 11.19 | 11.19 | 12.49 | 12.59 | 8.50  | 0.32  | 9.90  |       | 79    | 94    | 95   | 93   |     |
| 28. <i>S. teres</i> SKS026     | 11.84 | 11.84 | 11.84 | 11.84 | 11.84 | 11.84 | 11.84 | 10.76 | 10.87 | 10.87 | 10.87 | 10.87 | 10.87 | 10.98 | 10.87 | 10.87 | 10.87 | 10.87 | 10.87 | 10.87 | 10.87 | 10.87 | 11.41 | 11.52 | 0.00  | 8.50  | 9.90  | 8.50  |       | 101  | 100  | 103 |
| 29. <i>S. yagiui</i> SKS071    | 10.87 | 10.87 | 10.87 | 10.66 | 10.87 | 10.66 | 10.87 | 11.52 | 11.52 | 11.52 | 11.52 | 11.52 | 11.52 | 11.63 | 11.63 | 11.52 | 11.63 | 11.52 | 11.52 | 11.52 | 11.52 | 11.52 | 10.76 | 10.66 | 10.87 | 10.23 | 9.80  | 10.12 | 10.87 |      | 3    | 3   |
| 30. <i>S. yagiui</i> SKS164    | 10.76 | 10.76 | 10.76 | 10.55 | 10.76 | 10.55 | 10.76 | 11.41 | 11.41 | 11.41 | 11.41 | 11.41 | 11.41 | 11.52 | 11.52 | 11.41 | 11.52 | 11.41 | 11.41 | 11.41 | 11.41 | 11.41 | 10.66 | 10.55 | 10.76 | 10.33 | 10.01 | 10.23 | 10.76 | 0.32 |      | 4   |
| 31. <i>S. yagiui</i> SKS977    | 10.87 | 10.87 | 10.87 | 10.66 | 10.87 | 10.66 | 10.87 | 11.52 | 11.63 | 11.63 | 11.63 | 11.63 | 11.63 | 11.73 | 11.73 | 11.63 | 11.73 | 11.63 | 11.63 | 11.63 | 11.63 | 11.63 | 10.76 | 10.66 | 11.09 | 10.23 | 10.01 | 10.01 | 11.09 | 0.32 | 0.43 |     |



Supplementary Table S17. Numbers of nucleotide differences (above diagonal) and pairwise distances (% below diagonal) of the mitochondrial COI (nt) gene sequences among 31 *Spirostomum* populations.

| Taxon                          | 1     | 2     | 3     | 4     | 5     | 6     | 7     | 8     | 9     | 10    | 11    | 12    | 13    | 14    | 15    | 16    | 17    | 18    | 19    | 20    | 21    | 22    | 23    | 24    | 25    | 26    | 27    | 28    | 29   | 30   | 31  |
|--------------------------------|-------|-------|-------|-------|-------|-------|-------|-------|-------|-------|-------|-------|-------|-------|-------|-------|-------|-------|-------|-------|-------|-------|-------|-------|-------|-------|-------|-------|------|------|-----|
| 1. <i>S. ambiguum</i> SKS363   |       | 0     | 124   | 124   | 112   | 8     | 46    | 155   | 176   | 175   | 175   | 174   | 174   | 175   | 175   | 173   | 174   | 174   | 175   | 174   | 174   | 139   | 139   | 144   | 134   | 135   | 158   | 144   | 145  | 144  | 144 |
| 2. <i>S. ambiguum</i> SKS949   | 0.00  |       | 124   | 124   | 112   | 8     | 46    | 155   | 176   | 175   | 175   | 174   | 174   | 175   | 175   | 173   | 174   | 174   | 175   | 174   | 174   | 139   | 139   | 144   | 134   | 135   | 158   | 144   | 145  | 144  | 144 |
| 3. <i>S. ambiguum</i> SKS167   | 19.31 | 19.31 |       | 1     | 82    | 121   | 117   | 157   | 181   | 183   | 183   | 182   | 182   | 183   | 183   | 182   | 182   | 182   | 183   | 182   | 182   | 158   | 156   | 152   | 139   | 139   | 161   | 152   | 151  | 150  | 146 |
| 4. <i>S. ambiguum</i> SKS254   | 19.31 | 19.31 | 0.16  |       | 82    | 121   | 117   | 157   | 181   | 183   | 183   | 182   | 182   | 183   | 183   | 182   | 182   | 182   | 183   | 182   | 182   | 158   | 156   | 153   | 139   | 139   | 161   | 153   | 151  | 150  | 146 |
| 5. <i>S. ambiguum</i> SKS779   | 17.45 | 17.45 | 12.77 | 12.77 |       | 111   | 107   | 147   | 171   | 168   | 168   | 167   | 167   | 168   | 168   | 167   | 167   | 167   | 168   | 167   | 167   | 142   | 141   | 146   | 136   | 137   | 148   | 146   | 147  | 144  | 146 |
| 6. <i>S. ambiguum</i> SKS185   | 1.25  | 1.25  | 18.85 | 18.85 | 17.29 |       | 43    | 155   | 178   | 177   | 177   | 176   | 176   | 177   | 177   | 175   | 176   | 176   | 177   | 176   | 176   | 139   | 139   | 147   | 136   | 136   | 160   | 147   | 143  | 144  | 142 |
| 7. <i>S. ambiguum</i> SKS989   | 7.17  | 7.17  | 18.22 | 18.22 | 16.67 | 6.70  |       | 152   | 176   | 175   | 176   | 175   | 174   | 176   | 175   | 174   | 175   | 175   | 176   | 175   | 175   | 140   | 139   | 153   | 135   | 135   | 160   | 153   | 148  | 148  | 145 |
| 8. <i>S. caudatum</i> SKS302   | 24.14 | 24.14 | 24.45 | 24.45 | 22.90 | 24.14 | 23.68 |       | 148   | 150   | 151   | 150   | 149   | 151   | 150   | 149   | 150   | 150   | 151   | 150   | 150   | 145   | 141   | 120   | 106   | 107   | 138   | 120   | 126  | 125  | 122 |
| 9. <i>S. minus</i> GuS1058     | 27.41 | 27.41 | 28.19 | 28.19 | 26.64 | 27.73 | 27.41 | 23.05 |       | 14    | 15    | 14    | 13    | 15    | 14    | 13    | 14    | 14    | 15    | 14    | 14    | 168   | 164   | 152   | 145   | 146   | 160   | 152   | 161  | 161  | 161 |
| 10. <i>S. minus</i> SKS161     | 27.26 | 27.26 | 28.50 | 28.50 | 26.17 | 27.57 | 27.26 | 23.36 | 2.18  |       | 1     | 2     | 1     | 1     | 0     | 3     | 2     | 2     | 1     | 2     | 2     | 165   | 161   | 145   | 139   | 140   | 156   | 145   | 157  | 155  | 156 |
| 11. <i>S. minus</i> SKS182     | 27.26 | 27.26 | 28.50 | 28.50 | 26.17 | 27.57 | 27.41 | 23.52 | 2.34  | 0.16  |       | 1     | 2     | 0     | 1     | 2     | 1     | 1     | 0     | 1     | 1     | 165   | 161   | 144   | 139   | 140   | 156   | 144   | 157  | 155  | 156 |
| 12. <i>S. minus</i> SKS214     | 27.10 | 27.10 | 28.35 | 28.35 | 26.01 | 27.41 | 27.26 | 23.36 | 2.18  | 0.31  | 0.16  |       | 1     | 1     | 2     | 1     | 0     | 0     | 1     | 0     | 0     | 164   | 160   | 143   | 138   | 139   | 155   | 143   | 156  | 154  | 155 |
| 13. <i>S. minus</i> SKS386     | 27.10 | 27.10 | 28.35 | 28.35 | 26.01 | 27.41 | 27.10 | 23.21 | 2.02  | 0.16  | 0.31  | 0.16  |       | 2     | 1     | 2     | 1     | 1     | 2     | 1     | 1     | 164   | 160   | 144   | 138   | 139   | 155   | 144   | 156  | 154  | 155 |
| 14. <i>S. minus</i> SKS731     | 27.26 | 27.26 | 28.50 | 28.50 | 26.17 | 27.57 | 27.41 | 23.52 | 2.34  | 0.16  | 0.00  | 0.16  | 0.31  |       | 1     | 2     | 1     | 1     | 0     | 1     | 1     | 165   | 161   | 144   | 139   | 140   | 156   | 144   | 157  | 155  | 156 |
| 15. <i>S. minus</i> SKS743     | 27.26 | 27.26 | 28.50 | 28.50 | 26.17 | 27.57 | 27.26 | 23.36 | 2.18  | 0.00  | 0.16  | 0.31  | 0.16  | 0.16  |       | 3     | 2     | 2     | 1     | 2     | 2     | 165   | 161   | 145   | 139   | 140   | 156   | 145   | 157  | 155  | 156 |
| 16. <i>S. minus</i> SKS794     | 26.95 | 26.95 | 28.35 | 28.35 | 26.01 | 27.26 | 27.10 | 23.21 | 2.02  | 0.47  | 0.31  | 0.16  | 0.31  | 0.31  | 0.47  |       | 1     | 1     | 2     | 1     | 1     | 163   | 159   | 143   | 137   | 138   | 156   | 143   | 155  | 153  | 154 |
| 17. <i>S. minus</i> SKS840     | 27.10 | 27.10 | 28.35 | 28.35 | 26.01 | 27.41 | 27.26 | 23.36 | 2.18  | 0.31  | 0.16  | 0.00  | 0.16  | 0.16  | 0.31  | 0.16  |       | 0     | 1     | 0     | 0     | 164   | 160   | 143   | 138   | 139   | 155   | 143   | 156  | 154  | 155 |
| 18. <i>S. minus</i> SKS1018    | 27.10 | 27.10 | 28.35 | 28.35 | 26.01 | 27.41 | 27.26 | 23.36 | 2.18  | 0.31  | 0.16  | 0.00  | 0.16  | 0.16  | 0.31  | 0.16  | 0.00  |       | 1     | 0     | 0     | 164   | 160   | 143   | 138   | 139   | 155   | 143   | 156  | 154  | 155 |
| 19. <i>S. minus</i> SKS1044    | 27.26 | 27.26 | 28.50 | 28.50 | 26.17 | 27.57 | 27.41 | 23.52 | 2.34  | 0.16  | 0.00  | 0.16  | 0.31  | 0.00  | 0.16  | 0.31  | 0.16  | 0.16  |       | 1     | 1     | 165   | 161   | 144   | 139   | 140   | 156   | 144   | 157  | 155  | 156 |
| 20. <i>S. minus</i> SKS1073    | 27.10 | 27.10 | 28.35 | 28.35 | 26.01 | 27.41 | 27.26 | 23.36 | 2.18  | 0.31  | 0.16  | 0.00  | 0.16  | 0.16  | 0.31  | 0.16  | 0.00  | 0.00  | 0.16  |       | 0     | 164   | 160   | 143   | 138   | 139   | 155   | 143   | 156  | 154  | 155 |
| 21. <i>S. minus</i> SKS939     | 27.10 | 27.10 | 28.35 | 28.35 | 26.01 | 27.41 | 27.26 | 23.36 | 2.18  | 0.31  | 0.16  | 0.00  | 0.16  | 0.16  | 0.31  | 0.16  | 0.00  | 0.00  | 0.16  | 0.00  |       | 164   | 160   | 143   | 138   | 139   | 155   | 143   | 156  | 154  | 155 |
| 22. <i>S. subtilis</i> SKS1056 | 21.65 | 21.65 | 24.61 | 24.61 | 22.12 | 21.65 | 21.81 | 22.59 | 26.17 | 25.70 | 25.70 | 25.55 | 25.55 | 25.70 | 25.70 | 25.39 | 25.55 | 25.55 | 25.70 | 25.55 | 25.55 | 9     | 143   | 134   | 133   | 153   | 143   | 151   | 149  | 147  |     |
| 23. <i>S. subtilis</i> SKS937  | 21.65 | 21.65 | 24.30 | 24.30 | 21.96 | 21.65 | 21.65 | 21.96 | 25.55 | 25.08 | 25.08 | 24.92 | 24.92 | 25.08 | 25.08 | 24.77 | 24.92 | 24.92 | 25.08 | 24.92 | 24.92 | 1.40  | 140   | 134   | 133   | 152   | 140   | 149   | 147  | 144  |     |
| 24. <i>S. teres</i> SKS026     | 22.43 | 22.43 | 23.68 | 23.83 | 22.74 | 22.90 | 23.83 | 18.69 | 23.68 | 22.59 | 22.43 | 22.27 | 22.43 | 22.43 | 22.59 | 22.27 | 22.27 | 22.27 | 22.43 | 22.27 | 22.27 | 22.27 | 21.81 | 85    | 86    | 126   | 0     | 127   | 127  | 119  |     |
| 25. <i>S. teres</i> SKS187     | 20.87 | 20.87 | 21.65 | 21.65 | 21.18 | 21.18 | 21.03 | 16.51 | 22.59 | 21.65 | 21.65 | 21.50 | 21.50 | 21.65 | 21.65 | 21.34 | 21.50 | 21.50 | 21.65 | 21.50 | 21.50 | 20.87 | 20.87 | 13.24 | 1     | 100   | 85    | 113   | 111  | 119  |     |
| 26. <i>S. teres</i> SKS85      | 21.03 | 21.03 | 21.65 | 21.65 | 21.34 | 21.18 | 21.03 | 16.67 | 22.74 | 21.81 | 21.81 | 21.65 | 21.65 | 21.81 | 21.81 | 21.50 | 21.65 | 21.65 | 21.81 | 21.65 | 21.65 | 20.72 | 20.72 | 13.40 | 0.16  | 101   | 86    | 113   | 111  | 119  |     |
| 27. <i>S. teres</i> SKS1045    | 24.61 | 24.61 | 25.08 | 25.08 | 23.05 | 24.92 | 24.92 | 21.50 | 24.92 | 24.30 | 24.30 | 24.14 | 24.14 | 24.30 | 24.30 | 24.30 | 24.14 | 24.14 | 24.30 | 24.14 | 24.14 | 23.83 | 23.68 | 19.63 | 15.58 | 15.73 | 126   | 136   | 136  | 131  |     |
| 28. <i>S. teres</i> SKS351     | 22.43 | 22.43 | 23.68 | 23.83 | 22.74 | 22.90 | 23.83 | 18.69 | 23.68 | 22.59 | 22.43 | 22.27 | 22.43 | 22.43 | 22.59 | 22.27 | 22.27 | 22.27 | 22.43 | 22.27 | 22.27 | 22.27 | 21.81 | 0.00  | 13.24 | 13.40 | 19.63 | 127   | 127  | 119  |     |
| 29. <i>S. yagiui</i> SKS071    | 22.59 | 22.59 | 23.52 | 23.52 | 22.90 | 22.27 | 23.05 | 19.63 | 25.08 | 24.45 | 24.45 | 24.30 | 24.30 | 24.45 | 24.45 | 24.14 | 24.30 | 24.30 | 24.45 | 24.30 | 24.30 | 23.52 | 23.21 | 19.78 | 17.60 | 17.60 | 21.18 | 19.78 | 7    | 39   |     |
| 30. <i>S. yagiui</i> SKS977    | 22.43 | 22.43 | 23.36 | 23.36 | 22.43 | 22.43 | 23.05 | 19.47 | 25.08 | 24.14 | 24.14 | 23.99 | 23.99 | 24.14 | 24.14 | 23.83 | 23.99 | 23.99 | 24.14 | 23.99 | 23.99 | 23.21 | 22.90 | 19.78 | 17.29 | 17.29 | 21.18 | 19.78 | 1.09 | 38   |     |
| 31. <i>S. yagiui</i> SKS164    | 22.43 | 22.43 | 22.74 | 22.74 | 22.74 | 22.12 | 22.59 | 19.00 | 25.08 | 24.30 | 24.30 | 24.14 | 24.14 | 24.30 | 24.30 | 23.99 | 24.14 | 24.14 | 24.30 | 24.14 | 24.14 | 22.90 | 22.43 | 18.54 | 18.54 | 18.54 | 20.40 | 18.54 | 6.07 | 5.92 |     |

Supplementary Table S18. Numbers of amino acid differences (above diagonal) and pairwise distances (% , below diagonal) of the mitochondrial CO1 gene sequences among 31 *Spirostomum* populations.

| Taxon                          | 1     | 2     | 3     | 4     | 5     | 6     | 7     | 8     | 9     | 10    | 11    | 12    | 13    | 14    | 15    | 16    | 17    | 18    | 19    | 20    | 21    | 22    | 23    | 24    | 25    | 26    | 27    | 28    | 29     | 30    | 31 |    |    |    |
|--------------------------------|-------|-------|-------|-------|-------|-------|-------|-------|-------|-------|-------|-------|-------|-------|-------|-------|-------|-------|-------|-------|-------|-------|-------|-------|-------|-------|-------|-------|--------|-------|----|----|----|----|
| 1. <i>S. ambiguum</i> SKS363   |       | 0     | 30    | 30    | 30    | 1     | 5     | 45    | 50    | 47    | 47    | 47    | 47    | 47    | 47    | 47    | 47    | 47    | 47    | 47    | 47    | 47    | 47    | 47    | 47    | 47    | 47    | 47    | 47     | 47    | 47 | 47 |    |    |
| 2. <i>S. ambiguum</i> SKS949   | 0.00  |       | 30    | 30    | 30    | 1     | 5     | 45    | 50    | 47    | 47    | 47    | 47    | 47    | 47    | 47    | 47    | 47    | 47    | 47    | 47    | 47    | 47    | 47    | 47    | 47    | 47    | 47    | 47     | 47    | 47 | 47 |    |    |
| 3. <i>S. ambiguum</i> SKS167   | 14.08 | 14.08 |       | 0     | 17    | 29    | 28    | 55    | 56    | 55    | 55    | 55    | 55    | 55    | 55    | 55    | 55    | 55    | 55    | 55    | 55    | 55    | 55    | 55    | 55    | 55    | 55    | 55    | 55     | 55    | 55 | 55 | 55 |    |
| 4. <i>S. ambiguum</i> SKS254   | 14.08 | 14.08 | 0.00  |       | 17    | 29    | 28    | 55    | 56    | 55    | 55    | 55    | 55    | 55    | 55    | 55    | 55    | 55    | 55    | 55    | 55    | 55    | 55    | 55    | 55    | 55    | 55    | 55    | 55     | 55    | 55 | 55 | 55 |    |
| 5. <i>S. ambiguum</i> SKS779   | 14.08 | 14.08 | 7.98  | 7.98  |       | 29    | 27    | 53    | 52    | 51    | 51    | 51    | 51    | 51    | 51    | 51    | 51    | 51    | 51    | 51    | 51    | 51    | 51    | 51    | 51    | 51    | 51    | 51    | 51     | 51    | 51 | 51 | 51 |    |
| 6. <i>S. ambiguum</i> SKS185   | 0.47  | 0.47  | 13.62 | 13.62 | 13.62 |       | 4     | 44    | 51    | 48    | 48    | 48    | 48    | 48    | 48    | 48    | 48    | 48    | 48    | 48    | 48    | 48    | 48    | 48    | 48    | 48    | 48    | 48    | 48     | 48    | 48 | 48 | 48 |    |
| 7. <i>S. ambiguum</i> SKS989   | 2.35  | 2.35  | 13.15 | 13.15 | 12.68 | 1.88  |       | 45    | 51    | 48    | 48    | 48    | 48    | 48    | 48    | 48    | 48    | 48    | 48    | 48    | 48    | 48    | 48    | 48    | 48    | 48    | 48    | 48    | 48     | 48    | 48 | 48 | 48 |    |
| 8. <i>S. caudatum</i> SKS302   | 21.13 | 21.13 | 25.82 | 25.82 | 24.88 | 20.66 | 21.13 |       | 46    | 46    | 46    | 46    | 46    | 46    | 46    | 46    | 46    | 46    | 46    | 46    | 46    | 46    | 46    | 46    | 46    | 46    | 46    | 46    | 46     | 46    | 46 | 46 | 46 |    |
| 9. <i>S. minus</i> GuS1058     | 23.47 | 23.47 | 26.29 | 26.29 | 24.41 | 23.94 | 23.94 | 21.60 |       | 3     | 3     | 3     | 3     | 3     | 3     | 3     | 3     | 3     | 3     | 3     | 3     | 3     | 3     | 3     | 3     | 3     | 3     | 3     | 3      | 3     | 3  | 3  | 3  |    |
| 10. <i>S. minus</i> SKS161     | 22.07 | 22.07 | 25.82 | 25.82 | 23.94 | 22.54 | 22.54 | 21.60 | 1.41  |       | 0     | 0     | 0     | 0     | 0     | 0     | 0     | 0     | 0     | 0     | 0     | 0     | 0     | 0     | 0     | 0     | 0     | 0     | 0      | 0     | 0  | 0  | 0  |    |
| 11. <i>S. minus</i> SKS182     | 22.07 | 22.07 | 25.82 | 25.82 | 23.94 | 22.54 | 22.54 | 21.60 | 1.41  | 0.00  |       | 0     | 0     | 0     | 0     | 0     | 0     | 0     | 0     | 0     | 0     | 0     | 0     | 0     | 0     | 0     | 0     | 0     | 0      | 0     | 0  | 0  | 0  |    |
| 12. <i>S. minus</i> SKS214     | 22.07 | 22.07 | 25.82 | 25.82 | 23.94 | 22.54 | 22.54 | 21.60 | 1.41  | 0.00  | 0.00  |       | 0     | 0     | 0     | 0     | 0     | 0     | 0     | 0     | 0     | 0     | 0     | 0     | 0     | 0     | 0     | 0     | 0      | 0     | 0  | 0  | 0  |    |
| 13. <i>S. minus</i> SKS386     | 22.07 | 22.07 | 25.82 | 25.82 | 23.94 | 22.54 | 22.54 | 21.60 | 1.41  | 0.00  | 0.00  | 0.00  |       | 0     | 0     | 0     | 0     | 0     | 0     | 0     | 0     | 0     | 0     | 0     | 0     | 0     | 0     | 0     | 0      | 0     | 0  | 0  | 0  |    |
| 14. <i>S. minus</i> SKS731     | 22.07 | 22.07 | 25.82 | 25.82 | 23.94 | 22.54 | 22.54 | 21.60 | 1.41  | 0.00  | 0.00  | 0.00  | 0.00  |       | 0     | 0     | 0     | 0     | 0     | 0     | 0     | 0     | 0     | 0     | 0     | 0     | 0     | 0     | 0      | 0     | 0  | 0  | 0  |    |
| 15. <i>S. minus</i> SKS743     | 22.07 | 22.07 | 25.82 | 25.82 | 23.94 | 22.54 | 22.54 | 21.60 | 1.41  | 0.00  | 0.00  | 0.00  | 0.00  | 0.00  |       | 0     | 0     | 0     | 0     | 0     | 0     | 0     | 0     | 0     | 0     | 0     | 0     | 0     | 0      | 0     | 0  | 0  | 0  |    |
| 16. <i>S. minus</i> SKS794     | 22.07 | 22.07 | 25.82 | 25.82 | 23.94 | 22.54 | 22.54 | 21.60 | 1.41  | 0.00  | 0.00  | 0.00  | 0.00  | 0.00  | 0.00  |       | 0     | 0     | 0     | 0     | 0     | 0     | 0     | 0     | 0     | 0     | 0     | 0     | 0      | 0     | 0  | 0  | 0  |    |
| 17. <i>S. minus</i> SKS840     | 22.07 | 22.07 | 25.82 | 25.82 | 23.94 | 22.54 | 22.54 | 21.60 | 1.41  | 0.00  | 0.00  | 0.00  | 0.00  | 0.00  | 0.00  | 0.00  |       | 0     | 0     | 0     | 0     | 0     | 0     | 0     | 0     | 0     | 0     | 0     | 0      | 0     | 0  | 0  | 0  |    |
| 18. <i>S. minus</i> SKS1018    | 22.07 | 22.07 | 25.82 | 25.82 | 23.94 | 22.54 | 22.54 | 21.60 | 1.41  | 0.00  | 0.00  | 0.00  | 0.00  | 0.00  | 0.00  | 0.00  | 0.00  |       | 0     | 0     | 0     | 0     | 0     | 0     | 0     | 0     | 0     | 0     | 0      | 0     | 0  | 0  | 0  |    |
| 19. <i>S. minus</i> SKS1044    | 22.07 | 22.07 | 25.82 | 25.82 | 23.94 | 22.54 | 22.54 | 21.60 | 1.41  | 0.00  | 0.00  | 0.00  | 0.00  | 0.00  | 0.00  | 0.00  | 0.00  | 0.00  |       | 0     | 0     | 0     | 0     | 0     | 0     | 0     | 0     | 0     | 0      | 0     | 0  | 0  | 0  |    |
| 20. <i>S. minus</i> SKS1073    | 22.07 | 22.07 | 25.82 | 25.82 | 23.94 | 22.54 | 22.54 | 21.60 | 1.41  | 0.00  | 0.00  | 0.00  | 0.00  | 0.00  | 0.00  | 0.00  | 0.00  | 0.00  | 0.00  |       | 0     | 0     | 0     | 0     | 0     | 0     | 0     | 0     | 0      | 0     | 0  | 0  | 0  |    |
| 21. <i>S. minus</i> SKS939     | 22.07 | 22.07 | 25.82 | 25.82 | 23.94 | 22.54 | 22.54 | 21.60 | 1.41  | 0.00  | 0.00  | 0.00  | 0.00  | 0.00  | 0.00  | 0.00  | 0.00  | 0.00  | 0.00  | 0.00  |       | 0     | 0     | 0     | 0     | 0     | 0     | 0     | 0      | 0     | 0  | 0  | 0  |    |
| 22. <i>S. subtilis</i> SKS1056 | 17.37 | 17.37 | 20.66 | 20.66 | 19.72 | 16.90 | 16.43 | 20.66 | 26.29 | 25.82 | 25.82 | 25.82 | 25.82 | 25.82 | 25.82 | 25.82 | 25.82 | 25.82 | 25.82 | 25.82 | 25.82 |       | 1     | 46    | 40    | 40    | 39    | 46    | 47     | 47    | 47 | 47 |    |    |
| 23. <i>S. subtilis</i> SKS937  | 17.84 | 17.84 | 20.66 | 20.66 | 20.19 | 17.37 | 16.90 | 20.66 | 26.76 | 26.29 | 26.29 | 26.29 | 26.29 | 26.29 | 26.29 | 26.29 | 26.29 | 26.29 | 26.29 | 26.29 | 26.29 | 26.29 | 0.47  |       | 47    | 41    | 41    | 40    | 47     | 47    | 47 | 47 |    |    |
| 24. <i>S. teres</i> SKS026     | 21.13 | 21.13 | 22.54 | 22.54 | 22.07 | 21.13 | 20.66 | 15.96 | 23.94 | 22.54 | 22.54 | 22.54 | 22.54 | 22.54 | 22.54 | 22.54 | 22.54 | 22.54 | 22.54 | 22.54 | 22.54 | 21.60 | 22.07 |       | 24    | 24    | 35    | 0     | 30     | 30    | 31 |    |    |    |
| 25. <i>S. teres</i> SKS187     | 18.78 | 18.78 | 20.66 | 20.66 | 19.72 | 18.78 | 17.37 | 14.08 | 22.07 | 20.66 | 20.66 | 20.66 | 20.66 | 20.66 | 20.66 | 20.66 | 20.66 | 20.66 | 20.66 | 20.66 | 20.66 | 18.78 | 19.25 | 11.27 |       | 0     | 23    | 24    | 26     | 26    | 27 |    |    |    |
| 26. <i>S. teres</i> SKS85      | 18.78 | 18.78 | 20.66 | 20.66 | 19.72 | 18.78 | 17.37 | 14.08 | 22.07 | 20.66 | 20.66 | 20.66 | 20.66 | 20.66 | 20.66 | 20.66 | 20.66 | 20.66 | 20.66 | 20.66 | 20.66 | 18.78 | 19.25 | 11.27 | 0.00  |       | 23    | 24    | 26     | 26    | 27 |    |    |    |
| 27. <i>S. teres</i> SKS1045    | 20.66 | 20.66 | 22.54 | 22.54 | 21.60 | 20.66 | 19.72 | 17.84 | 18.31 | 18.31 | 18.31 | 18.31 | 18.31 | 18.31 | 18.31 | 18.31 | 18.31 | 18.31 | 18.31 | 18.31 | 18.31 | 18.31 | 18.31 | 18.31 | 18.31 | 18.78 | 16.43 | 10.80 | 10.80  |       | 35 | 32 | 33 |    |
| 28. <i>S. teres</i> SKS351     | 21.13 | 21.13 | 22.54 | 22.54 | 22.07 | 21.13 | 20.66 | 15.96 | 23.94 | 22.54 | 22.54 | 22.54 | 22.54 | 22.54 | 22.54 | 22.54 | 22.54 | 22.54 | 22.54 | 22.54 | 22.54 | 22.54 | 22.54 | 22.54 | 21.60 | 22.07 | 0.00  | 11.27 | 11.27  | 16.43 |    | 30 | 30 | 31 |
| 29. <i>S. yagiui</i> SKS071    | 19.72 | 19.72 | 21.60 | 21.60 | 20.66 | 19.25 | 19.72 | 14.55 | 21.60 | 20.19 | 20.19 | 20.19 | 20.19 | 20.19 | 20.19 | 20.19 | 20.19 | 20.19 | 20.19 | 20.19 | 20.19 | 20.19 | 22.07 | 22.07 | 14.08 | 12.21 | 12.21 | 15.02 | 0.1408 |       | 0  | 2  |    |    |
| 30. <i>S. yagiui</i> SKS977    | 19.72 | 19.72 | 21.60 | 21.60 | 20.66 | 19.25 | 19.72 | 14.55 | 21.60 | 20.19 | 20.19 | 20.19 | 20.19 | 20.19 | 20.19 | 20.19 | 20.19 | 20.19 | 20.19 | 20.19 | 20.19 | 20.19 | 22.07 | 22.07 | 14.08 | 12.21 | 12.21 | 15.02 | 14.08  | 0.00  |    | 2  |    |    |
| 31. <i>S. yagiui</i> SKS164    | 19.72 | 19.72 | 21.60 | 21.60 | 21.13 | 19.25 | 19.72 | 15.02 | 22.07 | 20.66 | 20.66 | 20.66 | 20.66 | 20.66 | 20.66 | 20.66 | 20.66 | 20.66 | 20.66 | 20.66 | 20.66 | 22.07 | 22.07 | 14.55 | 12.68 | 12.68 | 15.49 | 14.55 | 0.94   | 0.94  |    |    |    |    |

Supplementary Table S19. Numbers of nucleotide differences (above diagonal) and pairwise distances (% , below diagonal) of the mitochondrial CO1 (nt) gene sequences (without insert) among 31 *Spirostomum* populations.

| Taxon                          | 1     | 2     | 3     | 4     | 5     | 6     | 7     | 8     | 9     | 10    | 11    | 12    | 13    | 14    | 15    | 16    | 17    | 18    | 19    | 20    | 21    | 22    | 23    | 24    | 25    | 26    | 27    | 28    | 29   | 30   | 31 |
|--------------------------------|-------|-------|-------|-------|-------|-------|-------|-------|-------|-------|-------|-------|-------|-------|-------|-------|-------|-------|-------|-------|-------|-------|-------|-------|-------|-------|-------|-------|------|------|----|
| 1. <i>S. ambiguum</i> SKS363   |       | 0     | 51    | 51    | 43    | 4     | 21    | 65    | 63    | 63    | 63    | 63    | 63    | 63    | 63    | 63    | 63    | 63    | 63    | 63    | 63    | 59    | 58    | 58    | 59    | 60    | 67    | 58    | 64   | 61   | 58 |
| 2. <i>S. ambiguum</i> SKS949   | 0.00  |       | 51    | 51    | 43    | 4     | 21    | 65    | 63    | 63    | 63    | 63    | 63    | 63    | 63    | 63    | 63    | 63    | 63    | 63    | 63    | 59    | 58    | 58    | 59    | 60    | 67    | 58    | 64   | 61   | 58 |
| 3. <i>S. ambiguum</i> SKS167   | 14.29 | 14.29 |       | 0     | 36    | 50    | 48    | 58    | 66    | 67    | 67    | 67    | 67    | 67    | 67    | 67    | 67    | 67    | 67    | 67    | 67    | 67    | 65    | 59    | 53    | 53    | 61    | 59    | 59   | 57   | 52 |
| 4. <i>S. ambiguum</i> SKS254   | 14.29 | 14.29 | 0.00  |       | 36    | 50    | 48    | 58    | 66    | 67    | 67    | 67    | 67    | 67    | 67    | 67    | 67    | 67    | 67    | 67    | 67    | 67    | 65    | 59    | 53    | 53    | 61    | 59    | 59   | 57   | 52 |
| 5. <i>S. ambiguum</i> SKS779   | 12.04 | 12.04 | 10.08 | 10.08 |       | 43    | 46    | 57    | 61    | 59    | 59    | 59    | 59    | 59    | 59    | 59    | 59    | 59    | 59    | 59    | 59    | 62    | 61    | 54    | 53    | 54    | 57    | 54    | 55   | 54   | 51 |
| 6. <i>S. ambiguum</i> SKS185   | 1.12  | 1.12  | 14.01 | 14.01 | 12.04 |       | 20    | 67    | 65    | 65    | 65    | 65    | 65    | 65    | 65    | 65    | 65    | 65    | 65    | 65    | 65    | 61    | 60    | 61    | 61    | 61    | 67    | 61    | 63   | 62   | 57 |
| 7. <i>S. ambiguum</i> SKS989   | 5.88  | 5.88  | 13.45 | 13.45 | 12.89 | 5.60  |       | 63    | 63    | 63    | 64    | 64    | 63    | 64    | 63    | 64    | 64    | 64    | 64    | 64    | 64    | 61    | 59    | 62    | 59    | 59    | 67    | 62    | 61   | 61   | 59 |
| 8. <i>S. caudatum</i> SKS302   | 18.21 | 18.21 | 16.25 | 16.25 | 15.97 | 18.77 | 17.65 |       | 53    | 54    | 55    | 55    | 54    | 55    | 54    | 55    | 55    | 55    | 55    | 55    | 55    | 67    | 64    | 59    | 54    | 55    | 64    | 59    | 61   | 60   | 54 |
| 9. <i>S. minus</i> GuS1058     | 17.65 | 17.65 | 18.49 | 18.49 | 17.09 | 18.21 | 17.65 | 14.85 |       | 6     | 7     | 7     | 6     | 7     | 6     | 7     | 7     | 7     | 7     | 7     | 7     | 64    | 60    | 58    | 57    | 58    | 67    | 58    | 62   | 61   | 63 |
| 10. <i>S. minus</i> SKS161     | 17.65 | 17.65 | 18.77 | 18.77 | 16.53 | 18.21 | 17.65 | 15.13 | 1.68  |       | 1     | 1     | 0     | 1     | 0     | 1     | 1     | 1     | 1     | 1     | 1     | 61    | 57    | 54    | 53    | 54    | 65    | 54    | 60   | 57   | 60 |
| 11. <i>S. minus</i> SKS182     | 17.65 | 17.65 | 18.77 | 18.77 | 16.53 | 18.21 | 17.93 | 15.41 | 1.96  | 0.28  |       | 0     | 1     | 0     | 1     | 0     | 0     | 0     | 0     | 0     | 0     | 61    | 57    | 53    | 53    | 54    | 65    | 53    | 60   | 57   | 60 |
| 12. <i>S. minus</i> SKS214     | 17.65 | 17.65 | 18.77 | 18.77 | 16.53 | 18.21 | 17.93 | 15.41 | 1.96  | 0.28  | 0.00  |       | 1     | 0     | 1     | 0     | 0     | 0     | 0     | 0     | 0     | 61    | 57    | 53    | 53    | 54    | 65    | 53    | 60   | 57   | 60 |
| 13. <i>S. minus</i> SKS386     | 17.65 | 17.65 | 18.77 | 18.77 | 16.53 | 18.21 | 17.65 | 15.13 | 1.68  | 0.00  | 0.28  | 0.28  |       | 1     | 0     | 1     | 1     | 1     | 1     | 1     | 1     | 61    | 57    | 54    | 53    | 54    | 65    | 54    | 60   | 57   | 60 |
| 14. <i>S. minus</i> SKS731     | 17.65 | 17.65 | 18.77 | 18.77 | 16.53 | 18.21 | 17.93 | 15.41 | 1.96  | 0.28  | 0.00  | 0.00  | 0.28  |       | 1     | 0     | 0     | 0     | 0     | 0     | 0     | 61    | 57    | 53    | 53    | 54    | 65    | 53    | 60   | 57   | 60 |
| 15. <i>S. minus</i> SKS743     | 17.65 | 17.65 | 18.77 | 18.77 | 16.53 | 18.21 | 17.65 | 15.13 | 1.68  | 0.00  | 0.28  | 0.28  | 0.00  | 0.28  |       | 1     | 1     | 1     | 1     | 1     | 1     | 61    | 57    | 54    | 53    | 54    | 65    | 54    | 60   | 57   | 60 |
| 16. <i>S. minus</i> SKS794     | 17.65 | 17.65 | 18.77 | 18.77 | 16.53 | 18.21 | 17.93 | 15.41 | 1.96  | 0.28  | 0.00  | 0.00  | 0.28  | 0.00  | 0.28  |       | 0     | 0     | 0     | 0     | 0     | 61    | 57    | 53    | 53    | 54    | 65    | 53    | 60   | 57   | 60 |
| 17. <i>S. minus</i> SKS840     | 17.65 | 17.65 | 18.77 | 18.77 | 16.53 | 18.21 | 17.93 | 15.41 | 1.96  | 0.28  | 0.00  | 0.00  | 0.28  | 0.00  | 0.28  | 0.00  |       | 0     | 0     | 0     | 0     | 61    | 57    | 53    | 53    | 54    | 65    | 53    | 60   | 57   | 60 |
| 18. <i>S. minus</i> SKS1018    | 17.65 | 17.65 | 18.77 | 18.77 | 16.53 | 18.21 | 17.93 | 15.41 | 1.96  | 0.28  | 0.00  | 0.00  | 0.28  | 0.00  | 0.28  | 0.00  | 0.00  |       | 0     | 0     | 0     | 61    | 57    | 53    | 53    | 54    | 65    | 53    | 60   | 57   | 60 |
| 19. <i>S. minus</i> SKS1044    | 17.65 | 17.65 | 18.77 | 18.77 | 16.53 | 18.21 | 17.93 | 15.41 | 1.96  | 0.28  | 0.00  | 0.00  | 0.28  | 0.00  | 0.28  | 0.00  | 0.00  | 0.00  |       | 0     | 0     | 61    | 57    | 53    | 53    | 54    | 65    | 53    | 60   | 57   | 60 |
| 20. <i>S. minus</i> SKS1073    | 17.65 | 17.65 | 18.77 | 18.77 | 16.53 | 18.21 | 17.93 | 15.41 | 1.96  | 0.28  | 0.00  | 0.00  | 0.28  | 0.00  | 0.28  | 0.00  | 0.00  | 0.00  | 0.00  |       | 0     | 61    | 57    | 53    | 53    | 54    | 65    | 53    | 60   | 57   | 60 |
| 21. <i>S. minus</i> SKS939     | 17.65 | 17.65 | 18.77 | 18.77 | 16.53 | 18.21 | 17.93 | 15.41 | 1.96  | 0.28  | 0.00  | 0.00  | 0.28  | 0.00  | 0.28  | 0.00  | 0.00  | 0.00  | 0.00  | 0.00  |       | 61    | 57    | 53    | 53    | 54    | 65    | 53    | 60   | 57   | 60 |
| 22. <i>S. subtilis</i> SKS1056 | 16.53 | 16.53 | 18.77 | 18.77 | 17.37 | 17.09 | 17.09 | 18.77 | 17.93 | 17.09 | 17.09 | 17.09 | 17.09 | 17.09 | 17.09 | 17.09 | 17.09 | 17.09 | 17.09 | 17.09 | 17.09 | 17.09 | 7     | 64    | 61    | 60    | 72    | 64    | 65   | 62   | 62 |
| 23. <i>S. subtilis</i> SKS937  | 16.25 | 16.25 | 18.21 | 18.21 | 17.09 | 16.81 | 16.53 | 17.93 | 16.81 | 15.97 | 15.97 | 15.97 | 15.97 | 15.97 | 15.97 | 15.97 | 15.97 | 15.97 | 15.97 | 15.97 | 15.97 | 1.96  |       | 61    | 61    | 60    | 71    | 61    | 64   | 61   | 59 |
| 24. <i>S. teres</i> SKS026     | 16.25 | 16.25 | 16.53 | 16.53 | 15.13 | 17.09 | 17.37 | 16.53 | 16.25 | 15.13 | 14.85 | 14.85 | 15.13 | 14.85 | 15.13 | 14.85 | 14.85 | 14.85 | 14.85 | 14.85 | 14.85 | 17.93 | 17.09 |       | 39    | 40    | 57    | 0     | 56   | 54   | 50 |
| 25. <i>S. teres</i> SKS187     | 16.53 | 16.53 | 14.85 | 14.85 | 14.85 | 17.09 | 16.53 | 15.13 | 15.97 | 14.85 | 14.85 | 14.85 | 14.85 | 14.85 | 14.85 | 14.85 | 14.85 | 14.85 | 14.85 | 14.85 | 14.85 | 17.09 | 17.09 | 10.92 |       | 1     | 46    | 39    | 50   | 47   | 49 |
| 26. <i>S. teres</i> SKS85      | 16.81 | 16.81 | 14.85 | 14.85 | 15.13 | 17.09 | 16.53 | 15.41 | 16.25 | 15.13 | 15.13 | 15.13 | 15.13 | 15.13 | 15.13 | 15.13 | 15.13 | 15.13 | 15.13 | 15.13 | 15.13 | 16.81 | 16.81 | 11.20 | 0.28  |       | 47    | 40    | 50   | 47   | 49 |
| 27. <i>S. teres</i> SKS1045    | 18.77 | 18.77 | 17.09 | 17.09 | 15.97 | 18.77 | 18.77 | 17.93 | 18.77 | 18.21 | 18.21 | 18.21 | 18.21 | 18.21 | 18.21 | 18.21 | 18.21 | 18.21 | 18.21 | 18.21 | 18.21 | 20.17 | 19.89 | 15.97 | 12.89 | 13.17 |       | 57    | 60   | 59   | 49 |
| 28. <i>S. teres</i> SKS351     | 16.25 | 16.25 | 16.53 | 16.53 | 15.13 | 17.09 | 17.37 | 16.53 | 16.25 | 15.13 | 14.85 | 14.85 | 15.13 | 14.85 | 15.13 | 14.85 | 14.85 | 14.85 | 14.85 | 14.85 | 14.85 | 17.93 | 17.09 | 0.00  | 10.92 | 11.20 | 15.97 |       | 56   | 54   | 50 |
| 29. <i>S. yagiui</i> SKS071    | 17.93 | 17.93 | 16.53 | 16.53 | 15.41 | 17.65 | 17.09 | 17.09 | 17.37 | 16.81 | 16.81 | 16.81 | 16.81 | 16.81 | 16.81 | 16.81 | 16.81 | 16.81 | 16.81 | 16.81 | 16.81 | 18.21 | 17.93 | 15.69 | 14.01 | 14.01 | 16.81 | 15.69 |      | 4    | 22 |
| 30. <i>S. yagiui</i> SKS977    | 17.09 | 17.09 | 15.97 | 15.97 | 15.13 | 17.37 | 17.09 | 16.81 | 17.09 | 15.97 | 15.97 | 15.97 | 15.97 | 15.97 | 15.97 | 15.97 | 15.97 | 15.97 | 15.97 | 15.97 | 15.97 | 17.37 | 17.09 | 15.13 | 13.17 | 13.17 | 16.53 | 15.13 | 1.12 |      | 20 |
| 31. <i>S. yagiui</i> SKS164    | 16.25 | 16.25 | 14.57 | 14.57 | 14.29 | 15.97 | 16.53 | 15.13 | 17.65 | 16.81 | 16.81 | 16.81 | 16.81 | 16.81 | 16.81 | 16.81 | 16.81 | 16.81 | 16.81 | 16.81 | 16.81 | 17.37 | 16.53 | 14.01 | 13.73 | 13.73 | 13.73 | 14.01 | 6.16 | 5.60 |    |

**Supplementary Table S20.** Numbers of amino acid differences (above diagonal) and pairwise distances (% below diagonal) of the mitochondrial CO1 gene sequences (without insert) among 31 *Spirostomum* populations.

| Taxon                          | 1    | 2    | 3    | 4    | 5    | 6    | 7    | 8    | 9    | 10   | 11   | 12   | 13   | 14   | 15   | 16   | 17   | 18   | 19   | 20   | 21   | 22   | 23   | 24   | 25   | 26   | 27   | 28   | 29   | 30   | 31 |
|--------------------------------|------|------|------|------|------|------|------|------|------|------|------|------|------|------|------|------|------|------|------|------|------|------|------|------|------|------|------|------|------|------|----|
| 1. <i>S. ambiguum</i> SKS363   |      | 0    | 1    | 1    | 1    | 0    | 0    | 5    | 3    | 3    | 3    | 3    | 3    | 3    | 3    | 3    | 3    | 3    | 3    | 3    | 3    | 4    | 4    | 6    | 5    | 5    | 4    | 6    | 6    | 6    | 6  |
| 2. <i>S. ambiguum</i> SKS949   | 0.00 |      | 1    | 1    | 1    | 0    | 0    | 5    | 3    | 3    | 3    | 3    | 3    | 3    | 3    | 3    | 3    | 3    | 3    | 3    | 3    | 4    | 4    | 6    | 5    | 5    | 4    | 6    | 6    | 6    | 6  |
| 3. <i>S. ambiguum</i> SKS167   | 0.85 | 0.85 |      | 0    | 0    | 1    | 1    | 6    | 2    | 2    | 2    | 2    | 2    | 2    | 2    | 2    | 2    | 2    | 2    | 2    | 2    | 5    | 5    | 5    | 4    | 4    | 3    | 5    | 5    | 5    | 5  |
| 4. <i>S. ambiguum</i> SKS254   | 0.85 | 0.85 | 0.00 |      | 0    | 1    | 1    | 6    | 2    | 2    | 2    | 2    | 2    | 2    | 2    | 2    | 2    | 2    | 2    | 2    | 2    | 5    | 5    | 5    | 4    | 4    | 3    | 5    | 5    | 5    | 5  |
| 5. <i>S. ambiguum</i> SKS779   | 0.85 | 0.85 | 0.00 | 0.00 |      | 1    | 1    | 6    | 2    | 2    | 2    | 2    | 2    | 2    | 2    | 2    | 2    | 2    | 2    | 2    | 2    | 5    | 5    | 5    | 4    | 4    | 3    | 5    | 5    | 5    | 5  |
| 6. <i>S. ambiguum</i> SKS185   | 0.00 | 0.00 | 0.85 | 0.85 | 0.85 |      | 0    | 5    | 3    | 3    | 3    | 3    | 3    | 3    | 3    | 3    | 3    | 3    | 3    | 3    | 3    | 4    | 4    | 6    | 5    | 5    | 4    | 6    | 6    | 6    | 6  |
| 7. <i>S. ambiguum</i> SKS989   | 0.00 | 0.00 | 0.85 | 0.85 | 0.85 | 0.00 |      | 5    | 3    | 3    | 3    | 3    | 3    | 3    | 3    | 3    | 3    | 3    | 3    | 3    | 3    | 4    | 4    | 6    | 5    | 5    | 4    | 6    | 6    | 6    | 6  |
| 8. <i>S. caudatum</i> SKS302   | 4.24 | 4.24 | 5.08 | 5.08 | 5.08 | 4.24 | 4.24 |      | 4    | 4    | 4    | 4    | 4    | 4    | 4    | 4    | 4    | 4    | 4    | 4    | 4    | 7    | 7    | 5    | 5    | 5    | 4    | 5    | 6    | 6    | 6  |
| 9. <i>S. minus</i> GuS1058     | 2.54 | 2.54 | 1.69 | 1.69 | 1.69 | 2.54 | 2.54 | 3.39 |      | 0    | 0    | 0    | 0    | 0    | 0    | 0    | 0    | 0    | 0    | 0    | 0    | 5    | 5    | 3    | 3    | 3    | 2    | 3    | 4    | 4    | 4  |
| 10. <i>S. minus</i> SKS161     | 2.54 | 2.54 | 1.69 | 1.69 | 1.69 | 2.54 | 2.54 | 3.39 | 0.00 |      | 0    | 0    | 0    | 0    | 0    | 0    | 0    | 0    | 0    | 0    | 0    | 5    | 5    | 3    | 3    | 3    | 2    | 3    | 4    | 4    | 4  |
| 11. <i>S. minus</i> SKS182     | 2.54 | 2.54 | 1.69 | 1.69 | 1.69 | 2.54 | 2.54 | 3.39 | 0.00 | 0.00 |      | 0    | 0    | 0    | 0    | 0    | 0    | 0    | 0    | 0    | 0    | 5    | 5    | 3    | 3    | 3    | 2    | 3    | 4    | 4    | 4  |
| 12. <i>S. minus</i> SKS214     | 2.54 | 2.54 | 1.69 | 1.69 | 1.69 | 2.54 | 2.54 | 3.39 | 0.00 | 0.00 | 0.00 |      | 0    | 0    | 0    | 0    | 0    | 0    | 0    | 0    | 0    | 5    | 5    | 3    | 3    | 3    | 2    | 3    | 4    | 4    | 4  |
| 13. <i>S. minus</i> SKS386     | 2.54 | 2.54 | 1.69 | 1.69 | 1.69 | 2.54 | 2.54 | 3.39 | 0.00 | 0.00 | 0.00 | 0.00 |      | 0    | 0    | 0    | 0    | 0    | 0    | 0    | 0    | 5    | 5    | 3    | 3    | 3    | 2    | 3    | 4    | 4    | 4  |
| 14. <i>S. minus</i> SKS731     | 2.54 | 2.54 | 1.69 | 1.69 | 1.69 | 2.54 | 2.54 | 3.39 | 0.00 | 0.00 | 0.00 | 0.00 | 0.00 |      | 0    | 0    | 0    | 0    | 0    | 0    | 0    | 5    | 5    | 3    | 3    | 3    | 2    | 3    | 4    | 4    | 4  |
| 15. <i>S. minus</i> SKS743     | 2.54 | 2.54 | 1.69 | 1.69 | 1.69 | 2.54 | 2.54 | 3.39 | 0.00 | 0.00 | 0.00 | 0.00 | 0.00 | 0.00 |      | 0    | 0    | 0    | 0    | 0    | 0    | 5    | 5    | 3    | 3    | 3    | 2    | 3    | 4    | 4    | 4  |
| 16. <i>S. minus</i> SKS794     | 2.54 | 2.54 | 1.69 | 1.69 | 1.69 | 2.54 | 2.54 | 3.39 | 0.00 | 0.00 | 0.00 | 0.00 | 0.00 | 0.00 | 0.00 |      | 0    | 0    | 0    | 0    | 0    | 5    | 5    | 3    | 3    | 3    | 2    | 3    | 4    | 4    | 4  |
| 17. <i>S. minus</i> SKS840     | 2.54 | 2.54 | 1.69 | 1.69 | 1.69 | 2.54 | 2.54 | 3.39 | 0.00 | 0.00 | 0.00 | 0.00 | 0.00 | 0.00 | 0.00 | 0.00 |      | 0    | 0    | 0    | 0    | 5    | 5    | 3    | 3    | 3    | 2    | 3    | 4    | 4    | 4  |
| 18. <i>S. minus</i> SKS1018    | 2.54 | 2.54 | 1.69 | 1.69 | 1.69 | 2.54 | 2.54 | 3.39 | 0.00 | 0.00 | 0.00 | 0.00 | 0.00 | 0.00 | 0.00 | 0.00 | 0.00 |      | 0    | 0    | 0    | 5    | 5    | 3    | 3    | 3    | 2    | 3    | 4    | 4    | 4  |
| 19. <i>S. minus</i> SKS1044    | 2.54 | 2.54 | 1.69 | 1.69 | 1.69 | 2.54 | 2.54 | 3.39 | 0.00 | 0.00 | 0.00 | 0.00 | 0.00 | 0.00 | 0.00 | 0.00 | 0.00 | 0.00 |      | 0    | 0    | 5    | 5    | 3    | 3    | 3    | 2    | 3    | 4    | 4    | 4  |
| 20. <i>S. minus</i> SKS1073    | 2.54 | 2.54 | 1.69 | 1.69 | 1.69 | 2.54 | 2.54 | 3.39 | 0.00 | 0.00 | 0.00 | 0.00 | 0.00 | 0.00 | 0.00 | 0.00 | 0.00 | 0.00 | 0.00 |      | 0    | 5    | 5    | 3    | 3    | 3    | 2    | 3    | 4    | 4    | 4  |
| 21. <i>S. minus</i> SKS939     | 2.54 | 2.54 | 1.69 | 1.69 | 1.69 | 2.54 | 2.54 | 3.39 | 0.00 | 0.00 | 0.00 | 0.00 | 0.00 | 0.00 | 0.00 | 0.00 | 0.00 | 0.00 | 0.00 | 0.00 |      | 5    | 5    | 3    | 3    | 3    | 2    | 3    | 4    | 4    | 4  |
| 22. <i>S. subtilis</i> SKS1056 | 3.39 | 3.39 | 4.24 | 4.24 | 4.24 | 3.39 | 3.39 | 5.93 | 4.24 | 4.24 | 4.24 | 4.24 | 4.24 | 4.24 | 4.24 | 4.24 | 4.24 | 4.24 | 4.24 | 4.24 | 4.24 | 4.24 |      | 0    | 8    | 7    | 7    | 6    | 8    | 8    | 8  |
| 23. <i>S. subtilis</i> SKS937  | 3.39 | 3.39 | 4.24 | 4.24 | 4.24 | 3.39 | 3.39 | 5.93 | 4.24 | 4.24 | 4.24 | 4.24 | 4.24 | 4.24 | 4.24 | 4.24 | 4.24 | 4.24 | 4.24 | 4.24 | 4.24 | 4.24 | 0.00 |      | 8    | 7    | 7    | 6    | 8    | 8    | 8  |
| 24. <i>S. teres</i> SKS026     | 5.08 | 5.08 | 4.24 | 4.24 | 4.24 | 5.08 | 5.08 | 4.24 | 2.54 | 2.54 | 2.54 | 2.54 | 2.54 | 2.54 | 2.54 | 2.54 | 2.54 | 2.54 | 2.54 | 2.54 | 2.54 | 6.78 | 6.78 |      | 4    | 4    | 3    | 0    | 5    | 5    | 5  |
| 25. <i>S. teres</i> SKS187     | 4.24 | 4.24 | 3.39 | 3.39 | 3.39 | 4.24 | 4.24 | 4.24 | 2.54 | 2.54 | 2.54 | 2.54 | 2.54 | 2.54 | 2.54 | 2.54 | 2.54 | 2.54 | 2.54 | 2.54 | 2.54 | 5.93 | 5.93 | 3.39 |      | 0    | 1    | 4    | 3    | 3    | 3  |
| 26. <i>S. teres</i> SKS85      | 4.24 | 4.24 | 3.39 | 3.39 | 3.39 | 4.24 | 4.24 | 4.24 | 2.54 | 2.54 | 2.54 | 2.54 | 2.54 | 2.54 | 2.54 | 2.54 | 2.54 | 2.54 | 2.54 | 2.54 | 2.54 | 5.93 | 5.93 | 3.39 | 0.00 |      | 1    | 4    | 3    | 3    | 3  |
| 27. <i>S. teres</i> SKS1045    | 3.39 | 3.39 | 2.54 | 2.54 | 2.54 | 3.39 | 3.39 | 3.39 | 1.69 | 1.69 | 1.69 | 1.69 | 1.69 | 1.69 | 1.69 | 1.69 | 1.69 | 1.69 | 1.69 | 1.69 | 1.69 | 5.08 | 5.08 | 2.54 | 0.85 | 0.85 |      | 3    | 2    | 2    | 2  |
| 28. <i>S. teres</i> SKS351     | 5.08 | 5.08 | 4.24 | 4.24 | 4.24 | 5.08 | 5.08 | 4.24 | 2.54 | 2.54 | 2.54 | 2.54 | 2.54 | 2.54 | 2.54 | 2.54 | 2.54 | 2.54 | 2.54 | 2.54 | 2.54 | 6.78 | 6.78 | 0.00 | 3.39 | 3.39 | 2.54 |      | 5    | 5    | 5  |
| 29. <i>S. yagiui</i> SKS071    | 5.08 | 5.08 | 4.24 | 4.24 | 4.24 | 5.08 | 5.08 | 5.08 | 3.39 | 3.39 | 3.39 | 3.39 | 3.39 | 3.39 | 3.39 | 3.39 | 3.39 | 3.39 | 3.39 | 3.39 | 3.39 | 6.78 | 6.78 | 4.24 | 2.54 | 2.54 | 1.69 | 4.24 |      | 0    | 0  |
| 30. <i>S. yagiui</i> SKS977    | 5.08 | 5.08 | 4.24 | 4.24 | 4.24 | 5.08 | 5.08 | 5.08 | 3.39 | 3.39 | 3.39 | 3.39 | 3.39 | 3.39 | 3.39 | 3.39 | 3.39 | 3.39 | 3.39 | 3.39 | 3.39 | 6.78 | 6.78 | 4.24 | 2.54 | 2.54 | 1.69 | 4.24 | 0.00 |      | 0  |
| 31. <i>S. yagiui</i> SKS164    | 5.08 | 5.08 | 4.24 | 4.24 | 4.24 | 5.08 | 5.08 | 5.08 | 3.39 | 3.39 | 3.39 | 3.39 | 3.39 | 3.39 | 3.39 | 3.39 | 3.39 | 3.39 | 3.39 | 3.39 | 3.39 | 6.78 | 6.78 | 4.24 | 2.54 | 2.54 | 1.69 | 4.24 | 0.00 | 0.00 |    |

**Supplementary Table S21.** Log likelihoods (ln L) and *P*-values of AU (approximately unbiased), WKH (weighted Kishino-Hasegawa), and WSH (weighted Shimodaira-Hasegawa) tests for tree comparisons considering different topological scenarios. Significant differences (*P*-value < 0.05) between the best unconstrained and constrained topologies are in bold.

| Topology                                                             | Dataset | Log likely-<br>hood (-ln L) | $\Delta$ (-ln L) | AU           | WKH          | WSH          | Conclusion      |
|----------------------------------------------------------------------|---------|-----------------------------|------------------|--------------|--------------|--------------|-----------------|
| Best maximum likelihood tree (unconstrained)                         | CON-89  | 7833.0066                   | –                | 0.780        | 0.622        | 0.964        | –               |
|                                                                      | CO1-38  | 4521.7946                   | –                | 0.122        | 0.102        | 0.183        | –               |
|                                                                      | Tub-32  | 3813.3828                   | –                | 0.800        | 0.000        | 0.861        | –               |
| Monophyly of <i>Spirostomum</i> species with moniliform macronucleus | CO1-38  | 4526.7854                   | 4.99             | 0.122        | 0.102        | 0.183        | Not rejected    |
|                                                                      | Tub-32  | 3820.0138                   | 6.63             | 0.178        | 0.160        | 0.231        | Not rejected    |
| Monophyly of <i>Spirostomum</i> species with compact macronucleus    | CO1-38  | 4526.8669                   | 5.07             | 0.062        | 0.096        | 0.205        | Not rejected    |
|                                                                      | Tub-32  | 3815.6151                   | 2.23             | 0.267        | 0.188        | 0.415        | Not rejected    |
| Monophyly of <i>Spirostomum minus</i> clades                         | CON-89  | 7844.4821                   | 11.47            | <b>0.036</b> | 0.052        | 0.125        | Not rejected    |
| Monophyly of <i>Spirostomum teres</i> clades 1, 2, 3 and 4           | CON-89  | 7870.7522                   | 37.74            | <b>0.004</b> | <b>0.016</b> | <b>0.034</b> | <b>Rejected</b> |
| Monophyly of <i>Spirostomum teres</i> clades 1 and 2                 | CON-89  | 7834.7035                   | 1.69             | 0.572        | 0.378        | 0.856        | Not rejected    |
|                                                                      | CO1-38  | 4521.8258                   | 0.03             | 0.565        | 0.471        | 0.691        | Not rejected    |
|                                                                      | Tub-32  | 3814.7539                   | 1.37             | 0.436        | 0.336        | 0.533        | Not rejected    |
| Monophyly of <i>Spirostomum teres</i> clades 3 and 4                 | CON-89  | 7852.1695                   | 19.16            | <b>0.046</b> | 0.050        | 0.134        | Not rejected    |
| Monophyly of <i>Spirostomum teres</i> clades 1, 2 and 3              | CON-89  | 7838.3122                   | 5.30             | 0.245        | 0.228        | 0.549        | Not rejected    |
| Monophyly of <i>Spirostomum teres</i> clades 1, 2 and 4              | CON-89  | 7874.4004                   | 41.39            | <b>2e-04</b> | <b>0.006</b> | <b>0.017</b> | <b>Rejected</b> |

**Supplementary Table S22.** Morphological characterization of *Spirostomum* clades delimited in phylogenetic analyses.

| Clade designation       | Body size in vivo (µm) | Length:width ratio | Shape of posterior body end | Peristome, % of body length | CV, % of body length | Zoochlorellae | Morphology of MA             | No. of MA nodules | No. of MI | No. of CG rows | References                                                                                                                                                             |
|-------------------------|------------------------|--------------------|-----------------------------|-----------------------------|----------------------|---------------|------------------------------|-------------------|-----------|----------------|------------------------------------------------------------------------------------------------------------------------------------------------------------------------|
| <i>S. ambiguum</i>      | 717–1491 × 80–140      | 7.6–18.6:1         | Truncated                   | 45–78                       | 6–18                 | Absent        | Moniliform                   | 7–26              | 3–17      | 2–5            | Boscaro <i>et al.</i> (2014), Fernandes <i>et al.</i> (2016), Gao <i>et al.</i> (2016), Schmidt <i>et al.</i> (2007), Shazib <i>et al.</i> (2014; 2016), Present study |
| <i>S. caudatum</i>      | 442–450 × 20–24        | 17–22:1            | Tail-like                   | 18–20                       | 47–55                | Absent        | Ellipsoid                    | 1                 | N.A.      | 2–3            | Shazib <i>et al.</i> (2014), Present study                                                                                                                             |
| <i>S. dharwarensis</i>  | 327–519 × 28–51        | 8.4–14.8:1         | Rounded                     | 45–68                       | 8–28                 | Absent        | Filiform                     | 1                 | 1–6       | 3–4            | Boscaro <i>et al.</i> (2014)                                                                                                                                           |
| <i>S. minus</i> clade 1 | 342–735 × 29–61        | 7.4–19.1:1         | N.A.                        | 40–62                       | 6–26                 | Absent        | Moniliform                   | 5–25              | 1–9       | 2–5            | Boscaro <i>et al.</i> (2014), Schmidt <i>et al.</i> (2007), Present study                                                                                              |
| <i>S. minus</i> clade 2 | 358–997 × 28–78        | 6.5–16.4:1         | Truncated                   | 44–65                       | 6–25                 | Absent        | Moniliform                   | 7–20              | 1–18      | 2–4            | Boscaro <i>et al.</i> (2014), Shazib <i>et al.</i> (2016), Present study                                                                                               |
| <i>S. semivirescens</i> | 630–1425 × 35          | N.A.               | N.A.                        | ca. 50                      | N.A.                 | Present       | Moniliform                   | 12                | N.A.      | N.A.           | Esteban <i>et al.</i> (2009), Hines <i>et al.</i> (2018)                                                                                                               |
| <i>S. subtilis</i>      | 630–1190 × 32–55       | 12.8–27.0:1        | Truncated                   | 28–61                       | 10–39                | Absent        | Moniliform                   | 9–29              | 1–6       | 1–4            | Boscaro <i>et al.</i> (2014), Present study                                                                                                                            |
| <i>S. teres</i> clade 1 | 219–471 × 22–55        | 5.4–16.4:1         | Truncated                   | 31–56                       | 7–31                 | Absent        | Ellipsoid                    | 1                 | 1–4       | 2–6            | Boscaro <i>et al.</i> (2014), Schmidt <i>et al.</i> (2007), Shazib <i>et al.</i> (2014; 2016), Present study                                                           |
| <i>S. teres</i> clade 2 | 191–327 × 25–41        | 5.4–10.7:1         | Truncated                   | 32–52                       | 7–24                 | Absent        | Ellipsoid                    | 1                 | 1–3       | 2–4            | Boscaro <i>et al.</i> (2014), Fernandes <i>et al.</i> (2016), Present study                                                                                            |
| <i>S. teres</i> clade 3 | 305–430 × 32–45        | 8.2–11.1:1         | N.A.                        | 36–51                       | 16–38                | Absent        | Ellipsoid                    | 1                 | 1–2       | 2              | Boscaro <i>et al.</i> (2014)                                                                                                                                           |
| <i>S. teres</i> clade 4 | 269–679 × 27–53        | 7.9–19.1:1         | N.A.                        | 39–56                       | 10–26                | Absent        | Ellipsoid                    | 1                 | 1–3       | 3–5            | Boscaro <i>et al.</i> (2014)                                                                                                                                           |
| <i>S. yagiui</i>        | 200–630 × 20–50        | 5.9–15.8:1         | Truncated                   | 21–59                       | 5–27                 | Absent        | Ellipsoid, curved cylindroid | 1                 | 1–5       | 2–6            | Boscaro <i>et al.</i> (2014), Chen <i>et al.</i> (2017), Present study                                                                                                 |

**Notes:** CG, cortical granules; CV, contractile vacuole; MA, macronucleus; MI, micronucleus; N.A., data not available.

## References

- Boscaro, V. *et al.* Focusing on genera to improve species identification: Revised systematics of the ciliate *Spirostomum*. *Protist* **165**, 527–541; [10.1016/j.protis.2014.05.004](https://doi.org/10.1016/j.protis.2014.05.004) (2014).
- Chen, X., Kim, J. H., Shazib, S. U. A., Kwon, C. B. & Shin, M. K. Morphology and molecular phylogeny of three heterotrichid species (Ciliophora, Heterotrichea), including a new species of *Anigsteinia*. *Eur. J. Protistol.* **61**, 278–293; [10.1016/j.ejop.2017.06.005](https://doi.org/10.1016/j.ejop.2017.06.005) (2017).
- Esteban, G. F., Bradley, M. W., Finlay, B. J. A case-building *Spirostomum* (Ciliophora, Heterotrichida) with zoochlorellae. *Eur. J. Protistol.* **45**, 156–158; [10.1016/j.ejop.2009.01.002](https://doi.org/10.1016/j.ejop.2009.01.002) (2009).
- Fernandes, N. M., Paiva, T. da S., da Silva-Neto, I. D., Schlegel, M. & Schrago, C. G. Expanded phylogenetic analyses of the class Heterotrichea (Ciliophora, Postciliodesmatophora) using five molecular markers and morphological data. *Mol. Phylogenet. Evol.* **95**, 229–246; [10.1016/j.ympev.2015.10.030](https://doi.org/10.1016/j.ympev.2015.10.030) (2016).
- Gao, F. *et al.* The all-data-based evolutionary hypothesis of ciliated protists with a revised classification of the phylum Ciliophora (Eukaryota, Alveolata). *Sci. Rep.* **6**, 24874; [10.1038/srep24874](https://doi.org/10.1038/srep24874) (2016).
- Hines, H. N., Onsbring, H., Ettema, T. J. & Esteban, G. F. Molecular investigation of the ciliate *Spirostomum semivirescens*, with first transcriptome and new geographical records. *Protist* **169**, 875–886; [10.1016/j.protis.2018.08.001](https://doi.org/10.1016/j.protis.2018.08.001) (2018).
- Schmidt, S. L., Treuner, T., Schlegel, M. & Bernhard, D. Multiplex PCR approach for species detection and differentiation within the genus *Spirostomum* (Ciliophora, Heterotrichea). *Protist* **158**, 139–145; [10.1016/j.protis.2006.11.005](https://doi.org/10.1016/j.protis.2006.11.005) (2007).
- Shazib, S. U. A., Vďačný, P., Kim, J. H., Jang, S. W., Shin, M. K. Phylogenetic relationships of the ciliate class Heterotrichea (Protista, Ciliophora, Postciliodesmatophora) inferred from multiple molecular markers and multifaceted analysis strategy. *Mol. Phylogenet. Evol.* **78**, 118–135; [10.1016/j.ympev.2014.05.012](https://doi.org/10.1016/j.ympev.2014.05.012) (2014).
- Shazib, S. U. A., Vďačný, P., Kim, J. H., Jang, S. W., Shin, M. K. Molecular phylogeny and species delimitation within the ciliate genus *Spirostomum* (Ciliophora, Postciliodesmatophora, Heterotrichea), using the internal transcribed spacer region. *Mol. Phylogenet. Evol.* **102**, 128–144; [10.1016/j.ympev.2016.05.041](https://doi.org/10.1016/j.ympev.2016.05.041) (2016).
